1     **Mechanism of a COVID-19 nanoparticle vaccine candidate that elicits a broadly**  
2                   **neutralizing antibody response to SARS-CoV-2 variants**

3

4             Yi-Nan Zhang<sup>1</sup>, Jennifer Paynter<sup>1</sup>, Cindy Sou<sup>1</sup>, Tatiana Fourfouris<sup>1</sup>, Ying Wang<sup>3,4</sup>, Ciril  
5                   Abraham<sup>3</sup>, Timothy Ngo<sup>1</sup>, Yi Zhang<sup>3,4</sup>, Linling He<sup>1</sup>, and Jiang Zhu<sup>1,2,\*</sup>

6

7     <sup>1</sup>Department of Integrative Structural and Computational Biology, <sup>2</sup>Department of Immunology  
8     and Microbiology, The Scripps Research Institute, La Jolla, California 92037, USA

9     <sup>3</sup>Fels Institute for Cancer Research and Molecular Biology, and <sup>4</sup>Department of Microbiology  
10    and Immunology, Temple University, Philadelphia, Pennsylvania 19140, USA.

11

12    \*Corresponding author

13    JZ: Phone +1 (858) 784-8157; Email: [jiang@scripps.edu](mailto:jiang@scripps.edu)

14

15    **KEYWORDS**

16    Adjuvant; coronavirus disease 2019 (COVID-19); severe acute respiratory syndrome coronavirus  
17    2 (SARS-CoV-2); variant of concern (VOC); vaccine; lymph node; germinal center; broadly  
18    neutralizing antibody (bNAbs).

19 **ABSTRACT (150 words)**

20 Vaccines that induce potent neutralizing antibody (NAb) responses against emerging variants of  
21 severe acute respiratory syndrome coronavirus 2 (SARS-CoV-2) are essential for combating the  
22 coronavirus disease 2019 (COVID-19) pandemic. We demonstrated that mouse plasma induced  
23 by self-assembling protein nanoparticles (SApNPs) that present rationally designed S2GΔHR2  
24 spikes can neutralize the B.1.1.7, B.1.351, and P.1 variants with titers comparable to the wildtype  
25 strain. The adjuvant effect on vaccine-induced immunity was illustrated by testing 16 formulations  
26 for the multilayered I3-01v9 SApNP that presents 20 stabilized spikes. Using single-cell sorting,  
27 monoclonal antibodies (mAbs) with diverse neutralization breadth and potency were isolated from  
28 mice immunized with the receptor binding domain (RBD), S2GΔHR2 spike, and SApNP vaccines.  
29 The mechanism of vaccine-induced immunity was examined in mice. Compared with the soluble  
30 spike, the I3-01v9 SApNP showed 6-fold longer retention, 4-fold greater presentation on follicular  
31 dendritic cell dendrites, and 5-fold stronger germinal center reactions in lymph node follicles.

32

33

34 **ONE-SENTENCE SUMMARY (125 characters)**

35 With prolonged lymph node retention and robust germinal centers, spike nanoparticles offer a  
36 vaccine solution to emerging SARS-CoV-2 variants.

## 37 INTRODUCTION

38 The COVID-19 pandemic has led to more than 152 million infection cases and 3.2 million deaths  
39 globally. Human antibody responses to SARS-CoV-2 spike antigens in COVID-19 patients can be  
40 sustained for several months after infection (1-5). However, recently identified variants of concern  
41 (VOCs) exhibit higher transmissibility and resistance to prior immunity as SARS-CoV-2 continues  
42 to adapt to the human host (6, 7). One such variant, B.1.1.7, emerged from southeast England in  
43 October 2020 and accounted for two-thirds of new infections in London in December 2020, with  
44 a higher transmission rate (43-90%) and risk of mortality (32-104%) than previously circulating  
45 strains (8-11). Other variants, such as B.1.351 and P.1, also became prevalent in three provinces  
46 in South Africa and in Manaus, Brazil, respectively (7, 12-14). A new variant, B.1.617, is now  
47 causing a second wave of COVID-19 in India (15). The rise of SARS-CoV-2 VOCs and their rapid  
48 spread worldwide will likely result in more infection cases, hospitalizations, and potentially more  
49 deaths, further straining healthcare resources (14).

50 To date, eight COVID-19 vaccines have been approved for emergency use in humans, with  
51 more than 90 candidates assessed in various phases of clinical trials (16). With the exception of  
52 inactivated whole-virion vaccines, diverse platforms have been used to deliver the recombinant  
53 SARS-CoV-2 spike, such as mRNA-encapsulating liposomes (e.g., BNT162b2 and mRNA-1273),  
54 adenovirus vectors (e.g., ChAdOx1 nCoV-19 [AZD1222], CTII-nCoV, Sputnik V, and  
55 Ad26.COV2.S), and micelle-attached spikes (e.g., NVX-CoV2373). These vaccines demonstrated  
56 65-96% efficacy in Phase 3 trials, with lower morbidity and mortality associated with COVID-19  
57 disease (17-21). However, a notable loss of vaccine efficacy against new SARS-CoV-2 variants  
58 was reported because of spike mutations in the receptor-binding domain (RBD; e.g., K417N,  
59 E484K, and N501Y), N-terminal domain (NTD; e.g., L18F, D80A, D215G, and  $\Delta$ 242-244), and

60 other regions that are critical to spike stability (e.g., D614G) (7, 22-29). Among circulating VOCs,  
61 the B.1.351 lineage appeared to be most resistant to neutralization by convalescent plasma (9.4-  
62 fold) and vaccine sera (10.3 to 12.4-fold) (30), whereas a lesser degree of reduction was observed  
63 for an early variant, B.1.1.7 (31, 32). Based on these findings, it was suggested that vaccines would  
64 need to be updated periodically to maintain protection against rapidly evolving SARS-CoV-2 (25,  
65 33, 34). This raises the concern that herd immunity may not be achievable with current vaccines  
66 and highlights the necessity of developing vaccines that can elicit a broadly neutralizing antibody  
67 (bNAb) response to SARS-CoV-2 variants (25, 29). As previously reported (35-43), the production  
68 of a bNAb response relies on long-lived germinal center (GC) reactions to activate precursor B  
69 cells, stimulate affinity maturation, and form long-term immune memory. Antigen retention and  
70 presentation within lymph node follicles are key to the induction of long-lived GC reactions (35,  
71 37, 44, 45) and should be considered in the development of bNAb-producing vaccines (46).

72 We previously investigated the cause of SARS-CoV-2 spike metastability and rationally  
73 designed the S2G $\Delta$ HR2 spike, which was displayed on three self-assembling protein nanoparticle  
74 (SApNP) platforms, including ferritin (FR) 24-mer and multilayered E2p and I3-01v9 60-mers, as  
75 COVID-19 vaccine candidates (47). In the present study, we investigated the vaccine-induced  
76 NAb response to SARS-CoV-2 VOCs and mechanism by which SApNP vaccines (e.g., I3-01v9)  
77 generate such a response. We first examined the neutralizing activity of mouse plasma from our  
78 previous study (47) against three representative SARS-CoV-2 variants, B.1.1.7, B.1.351, and P.1.  
79 Mouse plasma induced by the spike-presenting I3-01v9 SApNP potently neutralized all three  
80 variants with comparable titers to the wildtype strain, Wuhan-Hu-1. When a different injection  
81 route was tested in mouse immunization, E2p and I3-01v9 SApNPs sustained neutralizing titers  
82 against the three VOCs, even at a low dosage of 3.3  $\mu$ g, whereas a significant reduction of plasma

83 neutralization was observed for the soluble spike. Next, we examined the adjuvant effect on  
84 vaccine-induced humoral and T-cell responses for the I3-01v9 SApNP. While the non-adjuvanted  
85 group yielded detectable neutralizing titers, conventional adjuvants, such as aluminum hydroxide  
86 (AH) and phosphate (AP), boosted the titers by 8.6 to 11.3-fold (or 9.6 to 12.3 times). Adjuvants  
87 that target the stimulator of interferon genes (STING) and Toll-like receptor 9 (TLR) pathways  
88 enhanced neutralization by 21 to 35-fold, either alone or combined with AP, in addition to a Th1-  
89 biased cellular response. We then performed single-cell sorting to isolate 20 monoclonal antibodies  
90 (mAbs) from RBD, spike, and I3-01v9 SApNP-immunized mice. These mAbs were from diverse  
91 B cell lineages, of which some neutralized the wildtype SARS-CoV-2 strain and three VOCs with  
92 equivalent potency. Lastly, we investigated how SApNPs behave in lymph nodes and induce GCs  
93 by characterizing vaccine delivery and immunological responses at the intraorgan, intracellular,  
94 and intercellular levels in the mouse model. The spike-presenting I3-01v9 SApNP showed 6-fold  
95 longer retention, 4-fold greater presentation on follicular dendritic cell dendrites, and 5-fold higher  
96 GC reactions. Intact protein nanoparticles in lymph node tissues were visualized by transmission  
97 electron microscopy (TEM). Our study demonstrates that a spike-presenting SApNP vaccine may  
98 confer broad protection against diverse SARS-CoV-2 variants.

## 99 **RESULTS**

### 100 **Spike and SApNP vaccine-induced neutralizing responses to SARS-CoV-2 variants.**

101 We previously demonstrated that the rationally designed S2G $\Delta$ HR2 spike was more immunogenic  
102 than the S2P spike (48), and SApNPs that present 8-20 spikes outperform soluble spikes in NAb  
103 elicitation (47) (**Fig. 1A**). Notably, the I3-01v9 SApNP that presents 20 S2G $\Delta$ HR2 spikes induced  
104 a potent NAb response to both SARS-CoV-1 and SARS-CoV-2, as well as critically needed T-cell  
105 responses (47). SARS-CoV-1 shares only modest sequence similarity (~73% in the RBD) with

106 SARS-CoV-2. Thus, we hypothesized that our vaccines would protect against emerging variants  
107 that are much more closely related to the wildtype SARS-CoV-2 strain, Wuhan-Hu-1.

108 We first assessed the neutralizing activity of polyclonal plasma induced by various spike  
109 and SApNP vaccine formulations from our previous study (47) against the wildtype SARS-CoV-  
110 2 strain, Wuhan-Hu-1, as a baseline for comparison (**Fig. 1B**). Mouse plasma collected at week 5  
111 after two intraperitoneal (i.p.) injections of adjuvanted vaccine antigens (50  $\mu$ g) was analyzed in  
112 pseudoparticle (pp) neutralization assays (49). The soluble S2P<sub>ECTO</sub> spike elicited the lowest 50%  
113 inhibitory dilution (ID<sub>50</sub>) titers, whereas the soluble S2G $\Delta$ HR2 spike increased neutralization with  
114 a 7.1-fold higher average ID<sub>50</sub> titer, which did not reach statistical significance because of within-  
115 group variation. All three spike-presenting SApNPs elicited superior neutralizing responses to the  
116 soluble S2P<sub>ECTO</sub> spike (47). Notably, the I3-01v9 SApNP showed the most potent neutralizing  
117 response, with an average ID<sub>50</sub> titer of 2090, which was 8.1-fold higher than the soluble S2P<sub>ECTO</sub>  
118 spike. Despite differences in ID<sub>50</sub> titers, the overall pattern remained the same as reported in our  
119 previous study (47). The differences might be attributable to the inherent variation of pseudovirus  
120 neutralization assays (49, 50). We then assessed neutralizing activity against three major SARS-  
121 CoV-2 variants (**Fig. 1C, fig. S1A, B**). The I3-01v9 SApNP induced a stronger neutralizing  
122 response against three VOCs, with 0.5-fold (B.1.1.7), 0.8-fold (B.1.351), and 1.8-fold (P.1) higher  
123 (or 1.5-2.8 times) ID<sub>50</sub> titers compared with the wildtype strain (**Fig. 1C**). Altogether, these results  
124 confirmed our hypothesis and highlighted the advantages of spike-presenting SApNPs.

125 Next, we examined the influence of injection dosage and route on the plasma neutralizing  
126 response to various SARS-CoV-2 strains. To this end, we performed a mouse study, in which three  
127 groups of mice were immunized with 5, 15, and 45  $\mu$ g of I3-01v9 SApNP three times through i.p.  
128 injection. Remarkably, all three SARS-CoV-2 VOCs were neutralized by mouse plasma, with

129 comparable ID<sub>50</sub> titers observed across dose groups (**fig. S1C, D**). To examine whether routes of  
130 injection affect the plasma neutralizing response against variants, we performed another mouse  
131 study, in which a low dose (3.3 µg) of adjuvanted antigen was intradermally administered into four  
132 footpads (i.e., 0.8 µg/footpad). The large (~55-60 nm) E2p and I3-01v9 SApNPs that present 20  
133 S2GΔHR2 spikes yielded higher ID<sub>50</sub> titers against the wildtype strain than the soluble S2GΔHR2  
134 spike (**Fig. 1D, fig. S1E, F**), whereas a notable reduction of ID<sub>50</sub> titers against the variants was  
135 noted for mouse plasma from the S2GΔHR2 group (**Fig. 1E, fig. S1E, F**), suggesting that  
136 multivalent display is critical for eliciting a broad neutralizing response. The E2p and I3-01v9  
137 SApNP groups exhibited comparable or stronger plasma neutralization against three VOCs relative  
138 to the wildtype Wuhan-Hu-1 strain (**Fig. 1E**). In our previous study, a panel of human NABs was  
139 used to evaluate the antigenicity of stabilized S2GΔHR2 spike and SApNPs and to validate the  
140 SARS-CoV-2-pp assays (47). In the present study, this panel of human NABs was tested against  
141 SARS-CoV-2-pps that carry spikes of the wildtype strain and the three VOCs (**Fig. 1F, fig. S1G**).  
142 Lower potency against the B.1.351 and P.1 variants, measured by the 50% inhibitory concentration  
143 (IC<sub>50</sub>), was observed for all human NABs, with the exception of NAb S309, which was identified  
144 from a SARS-CoV-1 patient (51). This finding is consistent with reports on convalescent patient  
145 plasma (30-32). As a negative control, mouse plasma induced by the S2GΔHR2-presenting I3-  
146 01v9 SApNP was tested against pseudoviruses carrying the murine leukemia virus (MLV)  
147 envelope glycoprotein (Env), or MLV-pps. Nonspecific neutralization was not detected for  
148 samples produced in two independent immunization experiments (**fig. S1H, I**). Altogether, these  
149 results demonstrate that spike-presenting SApNPs are more advantageous than soluble spikes in  
150 eliciting a strong neutralizing response against SARS-CoV-2 variants.

151 **Adjuvant effect on vaccine-induced neutralizing antibody and T-cell responses.**

152 Innate immunity plays an important role in regulating the adaptive immunity, including humoral  
153 and cellular immune responses (52-56). Adjuvant-formulated vaccines have been shown to recruit  
154 and activate innate immune cells more effectively at injection sites and local lymph nodes (57-60).  
155 Among commonly used adjuvants, AH and AP create depots for the recruitment and activation of  
156 antigen-presenting cells (APCs) at injection sites and sentinel lymph nodes (61, 62), whereas oil-  
157 in-water emulsions (e.g., MF59) promote antigen retention and APC stimulation in lymph nodes  
158 (63, 64). Pattern recognition receptor agonists (e.g., STING, TLR3, TLR4, TLR7/8, and TLR9  
159 agonists) stimulate APCs at injection sites and nearby lymph nodes (52, 59, 65-72). Macrophage  
160 inhibitors (e.g., clodronate liposomes, termed CL) directly stimulate B cells or inhibit antigen  
161 sequestration by subcapsular sinus macrophages, thus resulting in more effective GC simulation  
162 in lymph nodes (73-75). Adjuvant combinations may generate a synergistic immune response by  
163 simultaneously activating multiple pathways (59, 68).

164 To examine the effect of innate signaling pathways on SApNP-induced immune responses,  
165 we tested 16 adjuvant formulations in a systematic study (**Fig. 2A**), in which mice were immunized  
166 with the adjuvanted I3-01v9 SApNP (20 µg) via intradermal injections in four footpads (i.e., 5  
167 µg/footpad). We first tested mouse plasma neutralization against the wildtype SARS-CoV-2 stain.  
168 Mouse plasma at week 5 was analyzed in SARS-CoV-2-pp assays (**Fig. 2B, fig. S2A, B**). The non-  
169 adjuvanted group showed detectable neutralization after two doses, with an average ID<sub>50</sub> titer of  
170 160, which was used as a baseline in this analysis. By comparison, conventional adjuvants, such  
171 as AH, AP, and MF59 (AddaVax), increased ID<sub>50</sub> titers by 10.3, 7.6, and 12.5-fold, respectively.  
172 The macrophage inhibitor CL boosted plasma neutralization by merely 1.6-fold relative to the non-  
173 adjuvanted group. Adjuvants that target pattern recognition receptors exhibited differential effects  
174 on plasma neutralization, increasing ID<sub>50</sub> titers by 1.1 to 34.2-fold. Notably, STING and CpG



175 (TLR9) substantially enhanced neutralizing titers, whereas TLR3, TLR4, and TLR7/8 agonists  
176 only exerted a modest effect. In most cases, adjuvants combined with AP further boosted plasma  
177 neutralizing activity. For example, when TLR4 and TLR7/8 agonists were mixed with AP, a 3.1-  
178 fold increase in ID<sub>50</sub> titers was observed, suggesting a synergistic effect of stimulating multiple  
179 immune pathways. Overall, STING and CpG, either alone or combined with AP, elicited a plasma  
180 neutralizing response superior to any other adjuvant or adjuvant mix, increasing ID<sub>50</sub> titers by 21  
181 to 34-fold compared with the non-adjuvanted group. This is consistent with the results of the S-  
182 Trimer (SCB-2019), which, when formulated with CpG 1018 (TLR9 agonist) and alum adjuvants,  
183 induced potent NAb responses in nonhuman primates and human trials (76, 77). Mouse plasma at  
184 week 8 showed further increases in ID<sub>50</sub> titers (1 to 3-fold) for most adjuvant groups (**Fig. 2C, fig.**  
185 **S2C, D**). Lastly, we examined mouse plasma at week 5 from the STING and CpG groups against  
186 the B.1.1.7, B.1.351, and P.1 variants (**Fig. 2C, fig. S2E, F**). Both groups exhibited impressive  
187 neutralizing responses to the three VOCs, with ID<sub>50</sub> titers comparable to the wildtype strain.

188 We previously demonstrated that the AP-formulated I3-01v9 SApNP induces interferon- $\gamma$   
189 (IFN- $\gamma$ )-producing CD4<sup>+</sup> Th1 cells and IFN- $\gamma$ /interleukin-4 (IL-4) double-positive memory CD4<sup>+</sup>  
190 T cells (47). Given the superior performance of STING and CpG in plasma neutralization, we  
191 examined the impact of these two adjuvants on vaccine-induced T-cell responses. IFN- $\gamma$ -producing  
192 CD4<sup>+</sup> T helper (Th) cells are important for optimal antibody responses and the induction of cellular  
193 immunity to clear viruses (78-80). To assess the effect of STING and CpG on vaccine-induced Th  
194 cells, we isolated splenocytes from mice 8 weeks after vaccination and cultured them in the  
195 presence of BALB/c mouse dendritic cells (DCs) pulsed with the spike-presenting I3-01v9  
196 SApNP. Compared with the non-adjuvanted control (PBS in the place of an adjuvant), STING and  
197 CpG (TLR9) induced 3.7 and 5.5-fold more IFN- $\gamma$ -producing CD4<sup>+</sup> Th1 cells, and 5.5 and 16-fold

198 more IL-4-producing CD4<sup>+</sup> Th2 cells, respectively (**Fig. 2E**). A non-significant trend toward a  
199 higher frequency of both Th1 and Th2 cells was observed in mice immunized with the CpG-  
200 formulated I3-01v9 SApNP. Nonetheless, both adjuvants induced more IFN- $\gamma$ -producing CD4<sup>+</sup>  
201 Th1 cells than IL-4-producing CD4<sup>+</sup> Th2 cells, suggesting a dominant Th1 response in these mice.  
202 This is consistent with the results for the S-Trimer (SCB-2019), which, when formulated with the  
203 AS03 adjuvant or mixed CpG 1018/alum adjuvants, induced Th1-biased cellular responses in mice  
204 (76). STING and CpG also enhanced CD8<sup>+</sup> T-cell responses, by 6 and 10-fold, respectively,  
205 compared with the PBS control. Notably, this effect was more visible for CpG in terms of both the  
206 frequency and number of IFN- $\gamma$ -producing CD8<sup>+</sup> effector T cells (**Fig. 2F**).

207 Our results demonstrate that the I3-01v9 SApNP itself is immunogenic and adjuvants can  
208 further enhance vaccine-induced NAb responses in plasma by up to 35-fold. The I3-01v9 SApNP,  
209 when formulated with the STING or TLR9 agonist, yielded the highest ID<sub>50</sub> titers with robust  
210 CD4<sup>+</sup> and CD8<sup>+</sup> T-cell responses, highlighting their potential as adjuvants in the development of  
211 more effective SARS-CoV-2 vaccines.

### 212 **Diverse variant-neutralizing mouse antibody lineages identified by single-cell analysis.**

213 Although plasma neutralization confirmed the effectiveness of our newly designed SARS-CoV-2  
214 vaccines (47) against VOCs, the nature of this response was unclear. It might result from multiple  
215 NAb lineages that each target a specific strain (non-overlapping), a few bNAb lineages that are  
216 each able to block multiple strains (overlapping), or a combination of both. Previously, we used  
217 antigen-specific single-cell sorting to identify potent mouse NAb elicited by an I3-01 SApNP that  
218 presents 20 stabilized HIV-1 Env trimers (81). Here, we applied a similar strategy to decipher NAb  
219 responses induced by SARS-CoV-2 vaccines using mouse samples from our previous study (47),  
220 for which potent plasma neutralization against VOCs has been verified (**Fig. 1C**).

221 Spleen samples from M4 in the spike group (S2GΔHR2-5GS-1TD0) and M2 in the spike-  
222 SApNP group (S2GΔHR2-10GS-I3-01v9-L7P), along with a control sample from M2 in the RBD  
223 (RBD-5GS-1TD0) group were analyzed. Two probes, RBD-5GS-foldon-Avi and S2GΔHR2-5GS-  
224 foldon-Avi, were produced, biotinylated, and purified to facilitate antigen-specific B cell sorting  
225 (**fig. S3A, B**). Following antibody cloning, reconstituted mouse mAbs were tested for neutralizing  
226 activity against the wildtype strain, Wuhan-Hu-1, in SARS-CoV-2-pp assays. A total of 20 mAbs,  
227 four from the RBD group (**fig. S3C**), six from the spike group (**fig. S3D**), and 10 from the I3-01v9  
228 SApNP group (**fig. S3E**), were found to be NAbs. The genetic analysis of mAb sequences revealed  
229 some salient features of the vaccine-induced NAb response in mice (**Fig. 3A**). Overall, these mAbs  
230 evolved from diverse germline origins. The RBD-elicited mAbs appeared to use distinct germline  
231 variable (V) genes for both heavy chain (HC) and κ-light chain (KC), or V<sub>H</sub> and V<sub>K</sub>, respectively,  
232 whereas the spike and I3-01v9 SApNP-elicited mAbs shared some common V<sub>H</sub> genes, such as  
233 IGHV14-1/3 and IGHV1S81. This result was not unexpected because the RBD vaccine presents a  
234 structurally distinct antigen to the immune system compared with the spike and I3-01v9 vaccines,  
235 which both present the S2GΔHR2 spike. These mAbs showed low levels of somatic hypermutation  
236 (SHM) with respect to their germline genes. Heavy chain complementarity-determining region  
237 (HCDR3) loops ranged from 4 to 12 aa in length, whereas most KCs contained 9 aa KCDR3 loops.  
238 Collectively, diverse germline genes and HCDR3 loops, accompanied by low degrees of SHM,  
239 suggest that many antibody lineages must have been generated upon vaccination and some could  
240 achieve neutralizing activity without an extensive maturation process.

241 We then examined the biological function of these mouse mAbs. Neutralizing activity was  
242 assessed in SARS-CoV-2-pp assays against the wildtype strain and three VOCs (**Fig. 3B** and **fig.**  
243 **S3F**). Overall, diverse yet consistent patterns were observed for the three sets of mAbs. Both the

244 RBD vaccine (an RBD scaffold) and the two spike vaccines, albeit in different forms, appeared to  
245 elicit potent NAbs against the wildtype strain. MAbs TRBD-R-4G5, S2GD-S-2C10, and I3V9-R-  
246 1G9 showed similar  $IC_{50}$  values (0.019-0.030  $\mu\text{g/ml}$ ) against Wuhan-Hu-1, on par with the human  
247 NAbs CB6 (82) and CC12.1/3 (83) (**Fig. 1F**). All three vaccines elicited bNAbs responses, despite  
248 variation in potency for different mAbs against different strains. Notably, I3V9-R-1G9, which was  
249 isolated from an SApNP-immunized mouse, demonstrated high potency across four SARS-CoV-  
250 2 strains ( $IC_{50}$ : 0.007-0.024  $\mu\text{g/ml}$ ). This bNAbs provided evidence that individual bNAbs lineages  
251 may critically contribute to the plasma neutralization of SARS-CoV-2 VOCs (**Fig. 1C**). All three  
252 vaccines generated NAbs that preferentially neutralize specific SARS-CoV-2 strains. Some mAbs,  
253 such as TRBD-R-4B6, S2GD-S-1F3, and I3V9-R-2E11, were more effective against the wildtype  
254 strain and an early VOC, B.1.1.7, whereas a subset of mAbs (e.g., TRDB-R-4F3 and S2GD-S-  
255 2E4) neutralized B.1.351 and P.1 with greater potency. Although RBD-isolated NAbs likely  
256 neutralized SARS-CoV-2 by blocking receptor binding, those spike-isolated NAbs may target the  
257 RBD, N-terminal domain (NTD), or epitopes in the S2 subunit. Thus, we tested these mAbs in an  
258 enzyme-linked immunosorbent assay (ELISA) against the RBD monomer and S2G $\Delta$ HR2-5GS-  
259 1TD0 spike, both derived from the Wuhan-Hu-1 backbone (**Fig. 3C, fig. S3G, H**). Overall, all of  
260 the NAbs bound the RBD and spike with a half-maximal concentration ( $EC_{50}$ ) of 0.034  $\mu\text{g/ml}$  or  
261 lower, except for I3V9-R-2F2 (1.973  $\mu\text{g/ml}$  for the RBD and 2.051  $\mu\text{g/ml}$  for the spike). Most (15)  
262 NAbs showed greater binding affinity (or lower  $EC_{50}$  values) for the spike, suggesting that the two  
263 arms of the immunoglobulin (Ig) can each interact with one RBD of the spike, resulting in an  
264 avidity effect. Notably, more diverse binding patterns were observed for I3-01v9 SApNP-elicited  
265 NAbs. Although I3V9-S-1C9 and I3V9-S-1F5 bound to the spike more favorably than the RBD,  
266 indicated by 4.7 to 4.9-fold reduction in their  $EC_{50}$  values, three NAbs from this group (I3V9-R-

267 1G3 I3V9-R-1G9, and I3V9-R-2F10) preferred the monomeric RBD over the spike, which might  
268 be explained by steric hindrance when they approach the RBDs on a native-like spike.

269 Lastly, we characterized these mouse NAb in antigen-specific B-cell repertoires by next-  
270 generation sequencing (NGS), as previously demonstrated for NAb isolated from HIV-1 SApNP-  
271 immunized mice and rabbits (81). Using the same RBD and spike probes (**fig. S3A**), ~1500 splenic  
272 B cells were bulk-sorted from each of the three mice that were analyzed by single-cell sorting for  
273 mAb isolation (**fig. S4A**). Unbiased mouse antibody HC and KC libraries were constructed and  
274 sequenced on an Ion S5 platform, which yielded up to 4 million raw reads (**fig. S4B**). The antibody  
275 NGS data were then processed using a mouse antibodyomics pipeline (84) to remove low-quality  
276 reads, resulting in 0.11-0.41 full-length HCs and KCs (**Fig. S4B**). Quantitative profiles of critical  
277 antibody properties, such as germline gene usage, the degree of SHM, and CDR3 loop length, were  
278 determined for the RBD and spike-specific B cell populations (**fig. S4C**). All 20 single-cell-sorted  
279 mouse NAb could well fall in the range of these repertoire profiles, but some  $V_H/V_K$  genes that  
280 accounted for large portions of antigen-specific B cells, such as IGHV9 and IGHV5, were not used  
281 by any NAb, suggesting that they might give rise to non-neutralizing binding antibodies. Two-  
282 dimensional (2D) divergence/identity plots were generated to visualize these NAb in the context  
283 of NGS-derived B-cell repertoires (**Fig. 3D, fig. S4D, E, F**). Somatic variants were identified for  
284 each NAb by searching for sequences of the same  $V_H/V_K$  gene with a CDR3 identity cutoff of  
285 90% (or 85% for evolutionarily more remote variants). For the most potent NAb, TRBD-R-4G5,  
286 from an RBD-immunized mouse (M2), 34 HC variants were identified that overlapped with an  
287 “island” of high sequence similarity to TRBD-R-4G5 on the plot, whereas more KC variants  
288 (1183) were found, likely due to the lack of diversity in the KCDR3 region. A similar pattern was  
289 observed for the potent bNAb, I3V9-R-1G9, from an SApNP-immunized mouse (M2). By

290 comparison, fewer putative somatic variants were identified for other NABs in the antigen-specific  
291 B cell repertoires irrespective the sorting probe used (**fig. S4D-F**), suggesting that these NABs  
292 either were from less prevalent lineages or were generated in response to a previous injection (each  
293 mouse received four doses) (47). Similar observations were reported for the vaccination of non-  
294 human primates and humans in longitudinal repertoire analyses of single-cell-sorted NABs (85,  
295 86).

296 Single-cell isolation identified a panel of mouse mAbs with different neutralization breadth  
297 and potency against the wildtype SARS-CoV-2 strain and three major VOCs. The ELISA analysis  
298 suggested that the I3-01v9 SApNP can elicit NABs with more diverse angles of approach to their  
299 epitopes than the RBD and soluble spike vaccine. Structural analysis by crystallography and EM  
300 may be needed to provide a more detailed understanding of NAb-antigen interactions.

### 301 **Distribution and trafficking of I3-01v9 SApNP in mouse lymph node.**

302 After validating these vaccines against VOCs at both the plasma and mAb levels, we studied *in*  
303 *vivo* behaviors of the S2GΔHR2 spike and two large SApNPs to understand why SApNPs  
304 outperform soluble spikes in bNAb elicitation. In principle, these SApNPs need to be transported  
305 to lymph nodes, retained, and presented to various immune cell populations to induce robust innate  
306 and adaptive immune responses. Here, we first examined the transport and distribution of I3-01v9  
307 SApNPs in mouse lymph nodes via footpad injections (10 μg/footpad). The mice were sacrificed  
308 12 h after single-dose (**Fig. 4A**) and prime-boost (**Fig. 4B**) regimens. The axillary, brachial, and  
309 popliteal sentinel lymph nodes were isolated for histological analysis. The lymph node tissues were  
310 stained with the human anti-spike antibody P2B-2F6 (87) to characterize SARS-CoV-2 spikes  
311 presented on the I3-01v9 SApNPs. Consistent with our previous study (88), SApNPs accumulated  
312 in lymph node follicles, regardless of the number of doses. SApNPs were sequestered in the center

313 of lymph node follicles after a single dose (**Fig. 4A**, images on the left, schematics on the right)  
314 but were located along the outer layer of expanded lymph node follicles after the second injection  
315 due to preexisting humoral immunity (i.e., GC reactions) that was induced by the first dose (**Fig.**  
316 **4B**, images on the left, schematics on the right). Overall, the majority of SApNPs accumulated in  
317 lymph node follicles, but their distribution differed slightly depending on the doses.

318 In this context, we examined patterns of trafficking and lymph node follicle retention for  
319 soluble S2GΔHR2 spike vs. the S2GΔHR2-presenting E2p and I3-01v9 SApNPs. To facilitate this  
320 analysis, the mice were sacrificed 2 h to 8 weeks after a single dose (**Fig. 4C**) and 2 h to 5 weeks  
321 after the boost (**Fig. 4D**). The injection dose was normalized to the total amount of protein (10 μg)  
322 per injection into each footpad (40 μg/mouse). As shown in **Fig. 4C**, the S2GΔHR2 spikes that  
323 trafficked into lymph node follicles at 2 h cleared within 48 h. In contrast, the two large SApNPs  
324 accumulated in the subcapsular sinus at 2 h and then trafficked into follicles 12 h after the single-  
325 dose injection. Remarkably, I3-01v9 SApNPs remained detectable in lymph node follicles after 2  
326 weeks, suggesting 6-fold longer retention than the S2GΔHR2 spike (**Fig. 4C**). The results for these  
327 protein nanoparticles are thus consistent with the pattern of size dependency that was observed for  
328 ovalbumin-conjugated gold nanoparticles in our previous study (88), in which small (5-15 nm)  
329 nanoparticles cleared shortly after the injection, whereas large (50-100 nm) nanoparticles were  
330 retained in lymph node follicles for weeks. Similar patterns of antigen retention were observed  
331 after the second injection, although the boost appeared to exert a more positive effect on the soluble  
332 spike, which could be detected in lymph node follicles at 48 h (**Fig. 4D**). Nonetheless, prolonged  
333 retention was observed for both E2p and I3-01v9 SApNPs 2 weeks after the boost injection.  
334 Overall, the multivalent display of S2GΔHR2 spikes on the I3-01v9 SApNP resulted in 325- and  
335 4-fold greater accumulation in lymph node follicles compared with the soluble spike 48 h after the

336 single-dose (**Fig. 4E**) and prime-boost (**Fig. 4F**) injections, respectively. These findings reveal the  
337 advantage of a leading vaccine candidate identified in our previous study, S2GΔHR2-10GS-I3-  
338 01v9-L7P (47), in terms of spike antigen retention in lymph node follicles.

### 339 **Retention and presentation of I3-01v9 SApNP on follicular dendritic cell dendrites.**

340 Antigen retention and presentation in lymph node follicles are prerequisites to the stimulation of  
341 robust B cell responses and GC reactions (35, 37, 89). Resident cells spatially rearrange antigens  
342 and present them to B cells. Follicular dendritic cells (FDCs) are resident stromal cells in follicles  
343 and retain soluble antigens, immune complexes, virus-like particles, viruses, and bacteria (88, 90-  
344 94). FDCs are also key to GC initiation, maintenance, and B-cell affinity maturation (40, 95-98).  
345 Here, we hypothesized that FDCs comprise the major cell population in lymph node follicles that  
346 retain SARS-CoV-2 spikes and spike-presenting SApNPs. To test this hypothesis, we administered  
347 vaccines via footpad injections and collected mouse lymph nodes at the peak of accumulation (12  
348 h) after single-dose (**Fig. 5A**) and prime-boost (**Fig. 5B**) injections. Lymph node tissue samples  
349 were stained with the anti-spike antibody P2B-2F6 (87) for the S2GΔHR2 spike, as well as anti-  
350 CD21 and anti-CD169 antibodies for FDCs and subcapsular sinus macrophages, respectively. The  
351 spike and SApNP (E2p or I3-01v9) signals colocalized with FDC (CD21<sup>+</sup>) networks in lymph  
352 node follicles (**Fig. 5A, B**). This result confirmed the critical role of FDC networks in mediating  
353 vaccine retention in lymph node follicles.

354 The induction of potent bNAbs responses by spike-presenting SApNPs in mice suggests the  
355 effective activation of naïve B cells and subsequent recalls by crosslinking B cell receptors (94,  
356 99-102). We visualized the interface between FDC networks and B cells to better understand how  
357 FDC networks present SApNPs to engage B cells. Briefly, fresh lymph nodes were isolated and  
358 directly immersed in fixative. The processed tissue samples were sectioned and stained on copper



359 grids for TEM analysis. We first determined whether SApNPs, such as the S2GΔHR2-presenting  
360 I3-01v9 SApNP, remain intact *in vivo* (**fig. S5**). Mouse lymph nodes were isolated 2 h after the  
361 injection of a high dose (50 μg) of the non-adjuvanted I3-01v9 SApNP. The TEM images revealed  
362 that round-shape granules corresponding to intact SApNP aligned on the macrophage surface or  
363 inside endolysosomes of the macrophage in a lymph node (**fig. S5**). We next studied the relative  
364 location between FDCs and I3-01v9 SApNPs and how FDCs present SApNPs to B cells. Mouse  
365 lymph nodes were collected 2, 12, and 48 h after a single-dose (50 μg) and 12 h after the boost of  
366 the I3-01v9 SApNP vaccine. The FDCs exhibited the characteristic morphology of long dendrites  
367 that surrounded and interacted with B cells in lymph node follicles (**Fig. 5C, fig. S6**). Few I3-01v9  
368 SApNPs were observed on FDC dendrites at 2 h (**fig. S6D**), whereas notably more nanoparticles  
369 migrated to and aligned on FDC dendrites at 12 and 48 h (**Fig. 5C, fig. S6A-C**, yellow arrows).  
370 The TEM images indicated that FDCs can present many SApNPs to neighboring B cells in this  
371 “hugging mode”, in which their long dendrites brace B cells to maximize interactions between  
372 multivalently displayed spikes and B cell receptors. These results demonstrated the intrinsic nature  
373 of FDCs as a reservoir for the sequestration, retention, and presentation of virus-like particles, or  
374 SApNPs with similar molecular traits, to initiate GC reactions.

### 375 **Robust germinal center reactions induced by spike-presenting SApNPs.**

376 Long-lived GC reactions induce immune stimulation for B-cell selection and affinity maturation  
377 and the production of immune memory and bNAb responses (35, 36, 46). Here, we investigated  
378 whether the prolonged retention of S2GΔHR2-presenting E2p and I3-01v9 SApNPs induce more  
379 robust GCs in lymph node follicles than the soluble S2GΔHR2 spike. Immunohistological analysis  
380 was performed to characterize GC B cells (GL7<sup>+</sup>) and T follicular helper (T<sub>fh</sub>) cells (CD4<sup>+</sup>Bcl6<sup>+</sup>).  
381 For the I3-01v9 SApNP, 2 weeks after immunization, we observed robust GCs in lymph node B

382 cell follicles (B220<sup>+</sup>) with well-formed dark zone (DZ) and light zone (LZ) compartments, which  
383 contain GC B cells, FDCs, and T<sub>fh</sub> cells (36, 38, 103-107) (**Fig. 6A**). We then extended the analysis  
384 to the S2GΔHR2 spike and spike-presenting SApNPs 2, 5, and 8 weeks after the single-dose  
385 injection (**Fig. 6B, fig. S7A-C**) and 2 and 5 weeks after the boost (**Fig. 6C, fig. S7D, E**). Two  
386 metrics, the GC/FDC ratio (i.e., whether GC formation is associated with an FDC network, %) and  
387 GC size (i.e., occupied area), were used. Overall, the soluble spike and both large SApNPs induced  
388 robust GCs 2 weeks after immunization (**Fig. 6B, fig. S7A**). The E2p and I3-01v9 SApNPs that  
389 present 20 spikes induced robust, long-lived GCs, whereas the spike alone failed to sustain robust  
390 GCs at week 8 with either the single-dose (**Fig. 6B, D**) or prime-boost (**Fig. 6C, E**) injections. The  
391 I3-01v9 SApNP generated larger GCs than the soluble spike, 2.0-fold larger after the single dose  
392 (**Fig. 6B, D**) and 2.4-fold larger after the boost (**Fig. 6C, E**), measured at week 8.

393 We further characterized GC reactions by flow cytometry. Fresh mouse lymph nodes were  
394 disaggregated into a single cell suspension and stained with an antibody cocktail to quantify GC  
395 B cells and T<sub>fh</sub> cells (**fig. S8A**). The results were consistent with the immunohistological analysis,  
396 in which all spike-based vaccine antigens, including the S2GΔHR2 spike and SApNPs, showed  
397 robust GCs at week 2 after the injection that declined over time, as measured at weeks 5 and 8  
398 (**Fig. 6F**). The E2p and I3-01v9 SApNPs generated a larger population of GC B cells than both  
399 the S2P<sub>ECTO</sub> and S2GΔHR2 spikes at week 2 (**fig. S8B, C**). Although the boost dose had little  
400 impact on the frequency of GC B cells and T<sub>fh</sub> cells, it appeared to extend GC formation within  
401 lymph nodes (**Fig. 6F, G**), which may promote B cell development toward bNAbs. Notably, the  
402 GC B cell and T<sub>fh</sub> cell populations elicited by the soluble S2GΔHR2 spike were barely detectable  
403 5 weeks after immunization (**Fig. 6F, G**). This result was reminiscent of a recent study of an  
404 mRNA vaccine, in which GC reactions diminished to baseline levels at week 4 after a single-dose

405 injection (108). The S2G $\Delta$ HR2-presenting I3-01v9 SApNP generated 3.7/5.2-fold more GC B  
406 cells and 3.7/4.4-fold more T<sub>fh</sub> cells than the soluble S2G $\Delta$ HR2 spike at week 8 after one/two-  
407 dose immunization (**Fig. 6F, G**). Therefore, SApNPs that were retained on FDC dendrites could  
408 present NAb epitopes to enable more effective B cell recognition than the soluble spike, and  
409 consequently induce more robust and long-lived GCs in lymph nodes. Patterns of trafficking and  
410 retention may be specific to antigen size, as shown previously (88) and in the present study (**Figs.**  
411 **4 and 5**), but GC reactions are largely determined by vaccine adjuvants. This effect was briefly  
412 demonstrated for the E2p and I3-01v9 SApNPs, which were previously formulated with the  
413 AddaVax and AP adjuvants (47). At week 2 after a single-dose injection, the adjuvanted SApNPs  
414 induced stronger GC reactions than the non-adjuvanted groups (**fig. S9**). This result can also  
415 explain the differences in plasma neutralization between the adjuvanted and non-adjuvanted I3-  
416 01v9 SApNPs (**Fig. 2**).

417 NGS has been used to assess vaccine-draining lymph node B cell responses (109). Here,  
418 we characterized lymph node B cells at the repertoire level for three groups of mice immunized  
419 with two doses (3.3  $\mu$ g each) of the S2G $\Delta$ HR2 spike, E2p, and I301v9 SApNPs via footpad  
420 injections. At this dosage, the spike showed less effective plasma neutralization against VOCs than  
421 the large SApNPs (**Fig. 1E**). Given their differences in retention, presentation, and GC reaction  
422 (**Figs. 4-6**), they were expected to yield different lymph node B-cell profiles. Interestingly, antigen-  
423 specific sorting identified more spike-targeting lymph node B cells from the I3-01v9 SApNP group  
424 than both the spike and E2p SApNP groups (**fig. S10A**). The antibody NGS data were processed  
425 by the mouse antibodyomics pipeline (84) (**fig. S10B**) to derive repertoire profiles for all three  
426 groups (**fig. S10C-E**). Compared with the spike, the I3-01v9 SApNP appeared to activate fewer  
427 V<sub>H</sub>/V<sub>K</sub> genes (**fig. S10F**, left two), while generating a larger population of spike-specific lymph

428 node B cells (**fig. S10A**). This pattern was different from the analysis of GC B cells at week 5 after  
429 two injections, albeit at a higher (40  $\mu$ g) dosage (**Fig. 6G**). Importantly, the spike and SApNP  
430 groups showed a similar degree of SHM for V<sub>H</sub> genes (**fig. S10F**, middle left), in contrast to more  
431 mutated V<sub>H</sub> genes observed for hepatitis C virus (HCV) E2 core SApNPs (*110*). Notably, I3-01v9  
432 showed higher SHM for V<sub>K</sub> genes than E2p (**fig. S10F**, middle right). The I3-01v9 SApNP induced  
433 lymph node B cells exhibited highly consistent HCDR3 loop length across animals with little  
434 variation, as measured by the root-mean-square fluctuation (RMSF) (**fig. S10F**, right two). The  
435 unexpected lymph node B-cell profiles thus revealed the complex inner workings of a primary site  
436 for vaccine-induced immunity. The I3-01v9 SANP exhibited more “focused” B-cell activation and  
437 development in vaccine-draining lymph nodes. More studies are needed to determine the factors  
438 (e.g., SApNP carrier and adjuvant) that contribute to this selectivity.

## 439 **DISCUSSION**

440 To end the COVID-19 pandemic, vaccines need to effectively block current and emerging SARS-  
441 Cov-2 variants that evade NAb responses by mutating key epitopes on the viral spike (25). To  
442 overcome this challenge, some suggested that COVID-19 vaccines need to be updated on a regular  
443 basis (25, 33, 34), whereas others developed mosaic or cocktail vaccines based on currently known  
444 variants (*111, 112*). These vaccine strategies may not provide long-term solutions as SARS-CoV-  
445 2 is evolving rapidly and will acquire new mutations to evade vaccine-induced immunity (e.g.,  
446 B.1.617) (*15*). In our previous study (*47*), the spike-presenting SApNPs induced a potent NAb  
447 response to SARS-CoV-1, which is evolutionarily more distant to the wildtype SARS-CoV-2  
448 strain, Wuhan-Hu-1, than all its circulating variants. Based on this finding, we hypothesized that  
449 the spike-presenting SApNPs may provide an effective vaccine solution against SARS-CoV-2

450 variants. In the present study, we sought to confirm this hypothesis by testing three major VOCs  
451 and, if proven true, investigate the mechanism underlying such a broadly protective vaccine.

452 We explored several critical aspects related to vaccine effectiveness, with a focus on the  
453 lead candidate identified in our previous study, S2GΔHR2-10GS-I3-01v9-L7P (47). We first tested  
454 vaccine-induced mouse plasma, which represents a polyclonal response, against three SARS-CoV-  
455 2 VOCs. Mouse plasma generated previously (47) and in new studies using different regimens  
456 (e.g., injection route, dosage, and adjuvant) potently neutralized the variants. Notably, SApNPs  
457 retained their high ID<sub>50</sub> titers at a dosage as low as 3.3 μg, whereas formulation with the STING  
458 and TLR9 agonists further enhanced the I3-01v9 SApNP-induced neutralizing response. Plasma  
459 neutralization may be sensitive to assay variation (50) and should be interpreted with caution, but  
460 single-cell-sorted mAbs provided unambiguous evidence of the vaccine-induced bNAb response.  
461 Our results revealed that a plethora of NAb lineages were generated upon vaccination, with I3-  
462 01v9 SApNP being the most effective at eliciting bNAbs. Protein vaccines, despite the well-  
463 established records of safety and effectiveness, have yet to be deployed to mitigate the COVID-19  
464 pandemic (113-116). One protein vaccine, NVX-CoV2373 (micelle-attached spikes formulated  
465 with the Matrix-M<sup>TM</sup> adjuvant), showed 96.4% efficacy in human trials (117). Our studies  
466 demonstrate that SApNPs that present 20 stabilized spikes may provide a superior protein vaccine  
467 candidate that can be used either alone or as a booster for current nucleic acid vaccines (e.g.,  
468 mRNA and viral vectors) in the battle against emerging SARS-CoV-2 variants (15).

469 We explored the mechanism of SApNP vs. spike vaccines following the previously used  
470 strategy to analyze the *in vivo* behaviors of antigen-attached gold nanoparticles (88). In principle,  
471 SApNP vaccines must induce long-lasting GCs to facilitate the development of bNAbs. Effective  
472 vaccine retention and presentation are critical for inducing and sustaining GC reactions, which in

473 turn promote the proliferation and affinity maturation of antigen-specific B cells. Indeed, we found  
474 that the I3-01v9 SApNP, our lead vaccine candidate (47), elicited 6-fold longer retention and 4-  
475 fold greater accumulation in lymph node follicles than the stabilized S2GΔHR2 spike alone with  
476 a prime-boost regimen. This can be attributed to the intrinsic physiological properties of lymph  
477 nodes that mediate vaccine trafficking and retention in follicles in a size-dependent manner, which  
478 would favor retaining large (> 50 nm) virus-like particles (88, 90, 91, 102, 118, 119). Supporting  
479 this notion are the TEM images of retained SApNPs aligned on long FDC dendrites, suggesting  
480 that such protein nanoparticles can present spike antigens to B cells for rapid initiation and then  
481 sustain GC reactions in lymph node follicles for an extended period of time. Specifically, the I3-  
482 01v9 SApNP generated 2.4-fold larger GCs and greater numbers of GC B cells (5.2-fold) and T<sub>h</sub>  
483 cells (4.4-fold) than the soluble S2GΔHR2 spike with the prime-boost regimen. These findings  
484 provide quantitative evidence that spike-presenting SApNPs are uniquely suited for inducing long-  
485 lived robust GCs in lymph node follicles. Our analyses thus shed light on the mechanism by which  
486 the I3-01v9 SApNP can elicit a more effective bNAb response than the soluble spike (33).

487 As postulated by Burton and Topol, an in-depth understanding of bNAbs will facilitate the  
488 rational design of more effective SARS-CoV-2 vaccines (25). Superior NAb responses have been  
489 reported for some vaccine candidates that take advantage of particulate display (111, 120-131).  
490 The S2GΔHR2-presenting I3-01v9 SApNP elicited a potent bNAb response to three VOCs, thus  
491 overcoming a major challenge. Mechanistic studies of trafficking, retention, presentation, and GC  
492 reactions can provide much-needed insights into vaccine-induced immunity (116, 132-134). Such  
493 knowledge, once obtained for different vaccine platforms, such as inactivated whole virions,  
494 mRNAs, viral vectors, individual spikes, and SApNPs, will facilitate rational selection of the most  
495 effective vaccine candidate for SARS-CoV-2 other other pathogens.

## 496 MATERIALS AND METHODS

### 497 SARS-CoV-2 spike and SApNP vaccine antigens

498 The design, expression, and purification of a stabilized SARS-CoV-2 spike, S2G $\Delta$ HR2, and three  
499 SApNPs that present either 8 or 20 S2G $\Delta$ HR2 spikes were described in our recent study (47).  
500 Briefly, the spike gene of the SARS-CoV-2 isolate Wuhan-Hu-1 (GenBank accession no.  
501 MN908947) was modified to include the mutations <sup>682</sup>GSAGSV<sup>687</sup> and K986G/V987G, in addition  
502 to truncation of the HR2 stalk ( $\Delta$ E1150-Q1208). The viral capsid protein SHP (Protein Data Bank:  
503 1TD0) was added as a C-terminal trimerization motif to stabilize the S2G $\Delta$ HR2 trimer, resulting  
504 in a soluble S2G $\Delta$ HR2-5GS-1TD0 spike (47). The S2G $\Delta$ HR2 spike was genetically fused to FR,  
505 multilayered E2p, and multilayered I3-01v9 with 5GS, 5GS, and 10GS linkers, respectively,  
506 resulting in three S2G $\Delta$ HR2-presenting SApNPs (47). An S2P<sub>ECTO</sub>-5GS-1TD0 spike construct  
507 that contained the mutations <sup>682</sup>GSAGSV<sup>687</sup> and K986G/V987G but without HR2 deletion (47)  
508 was included for comparison. All vaccine antigens were transiently expressed in ExpiCHO cells  
509 and purified by a CR3022 antibody column and size-exclusion chromatography (SEC) as  
510 described previously (47). Briefly, ExpiCHO cells were thawed and incubated with ExpiCHO<sup>TM</sup>  
511 Expression Medium (Thermo Fisher) in a shaker incubator at 37 °C, 135 rotations per minute  
512 (rpm), and 8% CO<sub>2</sub>. When the cells reached a density of 10 $\times$ 10<sup>6</sup> ml<sup>-1</sup>, ExpiCHO<sup>TM</sup> Expression  
513 Medium was added to reduce cell density to 6 $\times$ 10<sup>6</sup> ml<sup>-1</sup> for transfection. The ExpiFectamine<sup>TM</sup>  
514 CHO/plasmid DNA complexes were prepared for 100-ml transfection in ExpiCHO cells following  
515 the manufacturer's instructions. For a given construct, 100  $\mu$ g of plasmid and 320  $\mu$ l of  
516 ExpiFectamine<sup>TM</sup> CHO reagent were mixed in 7.7 ml of cold OptiPRO<sup>TM</sup> medium (Thermo  
517 Fisher). After the first feed on day one, ExpiCHO cells were cultured in a shaker incubator at 33  
518 °C, 115 rpm and 8% CO<sub>2</sub> following the Max Titer protocol with an additional feed on day 5

519 (Thermo Fisher). Culture supernatants were harvested 13-14 days after transfection, clarified by  
520 centrifugation at 4000 rpm for 25 min, and filtered using a 0.45  $\mu\text{m}$  filter (Thermo Fisher). The  
521 CR3022 antibody column was used to extract SARS-CoV-2 antigens from the supernatants,  
522 followed by SEC on a Superdex 200 10/300 GL column (for scaffolded RBD trimers), a Superose  
523 6 16/600 GL column (for the S2G $\Delta$ HR2 spike, with and without Avi-tag), or a Superose 6 10/300  
524 GL column (for SApNPs). Protein concentration was determined using UV<sub>280</sub> absorbance with  
525 theoretical extinction coefficients.

### 526 **Animal immunization and sample collection**

527 Similar immunization protocols were reported in our previous vaccine studies (47, 110, 135, 136).  
528 Briefly, Institutional Animal Care and Use Committee (IACUC) guidelines were followed for all  
529 of the animal studies. BALB/c mice (6 weeks old) were purchased from The Jackson Laboratory  
530 and kept in ventilated cages in environmentally controlled rooms at The Scripps Research Institute.  
531 The mouse studies were conducted according to Association for the Assessment and Accreditation  
532 of Laboratory Animal Care guidelines, and the protocols were approved by the IACUC. For the  
533 immunogenicity study, the mice were intraperitoneally immunized at either week 0 or 3 with 200  
534  $\mu\text{l}$  of antigen/adjuvant mix containing 5-50  $\mu\text{g}$  of vaccine antigen and 100  $\mu\text{l}$  of adjuvant (47) or  
535 immunized at weeks 0 and 3 with 20  $\mu\text{l}$  of antigen/adjuvant mix containing 0.8  $\mu\text{g}$  of vaccine  
536 antigen per injection (3.3  $\mu\text{g}/\text{mouse}$ ) and 10  $\mu\text{l}$  of adjuvant per injection (four footpads were  
537 injected with 80  $\mu\text{l}$ , or 20  $\mu\text{l}/\text{footpad}$ ) via intradermal footpad injections. For the mechanistic study  
538 of vaccine trafficking, retention, and induced GCs, the mice were immunized at weeks 0 and 3  
539 with 20  $\mu\text{l}$  of antigen/adjuvant mix containing 10  $\mu\text{g}$  of vaccine antigen and 10  $\mu\text{l}$  of adjuvant per  
540 injection. To visualize the I3-01v9 SApNPs in lymph node tissues using TEM, the mice were  
541 immunized at weeks 0 and 3 with 70  $\mu\text{l}$  of antigen/adjuvant mix containing 50  $\mu\text{g}$  of vaccine



542 antigen and 20  $\mu$ l of adjuvant per injection. Vaccines were administered into intradermal footpads  
543 of mice using a 29-gauge insulin needle under 3% isoflurane anesthesia with oxygen. Blood was  
544 drawn from the maxillary/facial vein into an ethylenediaminetetraacetic acid (EDTA)-coated tube  
545 2 weeks after each immunization. Blood plasma was isolated after centrifugation at 14000 rpm for  
546 10 min. Plasma was heated and inactivated at 56°C for 30 min. The supernatant was then collected  
547 after centrifugation at 8000 rpm for 10 min. Plasma was used to determine NAb responses in the  
548 pseudovirus neutralization assays. The axillary, brachial, and popliteal sentinel lymph nodes were  
549 collected at the end timepoint for further analysis.

#### 550 **Experimental adjuvants and formulation**

551 The adjuvants squalene-oil-in-water (AddaVax), aluminum hydroxide (AH), aluminum phosphate  
552 (AP), 2'3'-c-di-AM(PS)<sub>2</sub> (Rp,Rp) (STING ligand), monophosphoryl lipid A from *S. minnesota*  
553 (MPLA-SM) R595 (TLR4 agonist), imidazoquinoline compound R848 (TLR7/8 agonist), and  
554 CpG ODN 1826, Class B (murine) (TLR9 agonist) were purchased from InvivoGen. PIKA, a  
555 TLR3 agonist with enhanced T cell and antibody responses reported for a Phase I rabies vaccine  
556 trial (137), was used as an adjuvant. PIKA was generously provided by Yisheng Biopharma and  
557 included in this study as an adjuvant that activates the TLR3 pathway. Macrophage inhibitors  
558 clodronate liposomes (Liposoma BV CP-005-005) were used to eliminate subcapsular sinus  
559 macrophages in lymph nodes to promote more robust B cell activation. Mouse immunization was  
560 performed to examine the adjuvant effect for the I3-01v9 SApNP formulated with 16 adjuvants or  
561 adjuvant combinations and compare with non-adjuvanted I3-01v9 SApNP (PBS in the place of an  
562 adjuvant). Adjuvants were mixed with vaccine antigen 10 min before immunization. The mice  
563 were intradermally immunized at weeks 0, 3, 6 with 30-35  $\mu$ l of antigen/adjuvant mix containing  
564 5  $\mu$ g of vaccine antigen I3-01v9 SApNP (20  $\mu$ g per mouse) and 20-25  $\mu$ l of adjuvant per injection

565 (four footpads were injected with a total of 120-140  $\mu$ l). Mouse blood was isolated at week 5 and  
566 8 after 2 and 3 intradermal injections, respectively. Spleens and lymph nodes were harvested at  
567 week 8 for immunological analyses. Spleen samples were ground through a 70  $\mu$ m cell strainer to  
568 release splenocytes into a cell suspension. Splenocytes were spun down at 400  $\times$  g for 10 min,  
569 washed with PBS, and treated with ammonium-chloride-potassium (ACK) lysing buffer (Lonza).  
570 Splenocytes were then frozen with 3 ml of Bambanker freezing media.

### 571 **SARS-CoV-2 pseudovirus neutralization assay**

572 The SARS-CoV-2-pp neutralization assays were described in our previous study (47). Briefly,  
573 SARS-CoV-2-pps were generated by the co-transfection of HEK293T cells with the HIV-1 pNL4-  
574 3.lucR-E- plasmid (obtained from the National Institutes of Health AIDS reagent program;  
575 <https://www.aidsreagent.org/>) and the expression plasmid encoding the *S* gene of various SARS-  
576 CoV-2 strains, including three variants: B.1.1.7, B.1.351, and P.1 (GISAID accession no.  
577 EPI\_ISL\_601443, EPI\_ISL\_678597, and EPI\_ISL\_792680, respectively). The HEK293T-hACE2  
578 cell line (catalog no. NR-52511) and pcDNA3.1(-) vector containing the *S* gene of the SARS-CoV-  
579 2 isolate Wuhan-Hu-1 (catalog no. NR52420) were requested from the BEI Resources  
580 (<https://www.beiresources.org/>) on September 23, 2020 and used in the pseudovirus neutralization  
581 assays (49). Based on sequence alignment, spike mutations were incorporated into the *S* gene of  
582 the original Wuhan-Hu-1 isolate (catalog no. NR52420) to create respective expression plasmids  
583 for B.1.1.7, B.1.351, and P.1. SARS-CoV-2-pp neutralization by immunized mouse plasma and  
584 human or mouse mAbs was performed according to our previously described protocol (47). Using  
585 the same co-transfection expression system as described above for the SARS-CoV-2-pps, we  
586 produced pseudoviruses carrying the murine leukemia virus (MLV) Env, MLV-pps, for use as a  
587 negative control (47). Percent neutralization data were analyzed using GraphPad Prism 9.0.2

588 software. ID<sub>50</sub>/IC<sub>50</sub> values were calculated using constraints for percent neutralization (0-100%),  
589 whereas unconstrained neutralization plots are shown in **Figs. 1** and **figs. S1-S3**.

### 590 **Enzyme-linked immunosorbent assay**

591 Each well of a Costar<sup>TM</sup> 96-well assay plate (Corning) was first coated with 50 µl PBS containing  
592 0.2 µg of the appropriate antigens. The plates were incubated overnight at 4 °C, and then washed  
593 five times with wash buffer containing PBS and 0.05% (v/v) Tween 20. Each well was then coated  
594 with 150 µl of blocking buffer consisting of PBS and 40 mg/ml blotting-grade blocker (Bio-Rad).  
595 The plates were incubated with blocking buffer for 1 h at room temperature, and then washed five  
596 times with wash buffer. Mouse mAbs, in the immunoglobulin G (IgG) form, were diluted in the  
597 blocking buffer to a maximum concentration of 10 µg/ml followed by a 10-fold dilution series.  
598 For each dilution, a total volume of 50 µl was added to the appropriate wells. Each plate was  
599 incubated for 1 h at room temperature and then washed five times with PBS containing 0.05%  
600 Tween 20. A 1:5000 dilution of horseradish peroxidase (HRP)-conjugated goat anti-human IgG  
601 antibody (Jackson ImmunoResearch Laboratories) was then made in wash buffer (PBS containing  
602 0.05% Tween 20), with 50 µl of this diluted secondary antibody added to each well. The plates  
603 were incubated with the secondary antibody for 1 h at room temperature, and then washed six  
604 times with PBS containing 0.05% Tween 20. Finally, the wells were developed with 50 µl of TMB  
605 (Life Sciences) for 3-5 min before stopping the reaction with 50 µl of 2 N sulfuric acid. The  
606 resulting plate readouts were measured at a wavelength of 450 nm. The ELISA data were analyzed  
607 to calculate EC<sub>50</sub> values using GraphPad Prism 9.0.2 software.

### 608 **Histology, immunostaining, and imaging**

609 The mice were sacrificed 2 h to 8 weeks after a single-dose and 2 h to 5 weeks after the boost  
610 immunization. The axillary, brachial, and popliteal sentinel lymph nodes were isolated for  
611 histological analysis. Fresh lymph nodes were rapidly merged into frozen section compound  
612 (VWR International, catalog no. 95057-838) in a plastic cryomold (Tissue-Tek at VWR, catalog  
613 no. 4565) using liquid nitrogen to preserve the antigens on the cell membrane and spike. Lymph  
614 node samples were stored at -80°C and sent to the Centre for Phenogenomics on dry ice for further  
615 sample processing. Tissue sections (8 µm) were cut on a cryostat (Cryostar NX70) and collected  
616 on charged slides. Sections were post-fixed in 10% neutral buffered formalin and permeabilized  
617 in PBS containing 0.5% Triton X-100 before immunostaining. Protein Block (Agilent) was used  
618 to block nonspecific antibody binding before incubating the sections with primary antibody  
619 overnight at 4°C. After washing in TBST, the sections were incubated in fluorophore-conjugated  
620 secondary antibodies for 1 h at room temperature. Lymph node tissue sections were stained with  
621 human anti-spike antibody P2B-2F6 (87) (1:50) and biotinylated goat anti-human secondary  
622 antibody (Abcam, catalog no. ab7152, 1:300), followed by streptavidin-HRP reagent (Vectastain  
623 Elite ABC-HRP Kit, Vector, catalog no. PK-6100) then DAB (ImmPACT DAB, Vector, catalog  
624 no. SK-4105) to study the distribution and retention of the S2GΔHR2 spike alone and S2GΔHR2-  
625 presenting E2p and I3-01v9 SApNPs. For immunofluorescent staining, tissue sections were  
626 stained for FDCs using anti-CD21 antibody (Abcam, catalog no. ab75985, 1:1800) followed by  
627 anti-rabbit secondary antibody conjugated with Alexa Fluor 555 (Thermo Fisher, catalog no.  
628 A21428; 1:200), stained for B cells using anti-B220 antibody (eBioscience, catalog no. 14-0452-  
629 82, 1:100) followed by anti-rat secondary antibody conjugated with Alexa Fluor 674 (Thermo  
630 Fisher, catalog no. A21247; 1:200), and stained for subcapsular sinus macrophages using anti-  
631 sialoadhesin (CD169) antibody (Abcam, catalog no. ab53443, 1:600) followed by anti-rat

632 secondary antibody conjugated with Alexa Fluor 488 (Abcam, catalog no. ab150165; 1:200).  
633 Germinal center B cells were labeled using rat anti-GL7 antibody (FITC; BioLegend, catalog no.  
634 144604, 1:250). T<sub>fh</sub> cells were labeled using CD4 antibody (BioLegend, catalog no. 100402,  
635 1:100) followed by anti-rat secondary antibody conjugated with Alexa Fluor 488 (Abcam, catalog  
636 no. ab150165; 1:1000) and Bcl6 antibody (Abcam, catalog no. ab220092, 1:300) followed by anti-  
637 rabbit secondary antibody conjugated with Alexa Fluor 555 (Thermo Fisher, catalog no. A21428;  
638 1:1000). Nuclei were then counterstained with DAPI (Sigma-Aldrich, catalog no. D9542, 100  
639 ng/ml). The stained tissue sections were scanned using an Olympus VS-120 slide scanner and  
640 imaged using a Hamamatsu ORCA-R2 C10600 digital camera for all bright-field and fluorescent  
641 images. Bright-field images of stained S2GΔHR2 spike and S2GΔHR2-presenting SApNPs in  
642 lymph node follicles and fluorescent images of GCs were quantified using ImageJ software  
643 (National Institutes of Health) (138).

#### 644 **Electron microscopy analysis of protein nanoparticles and lymph node tissues**

645 Electron microscopy (EM) analysis was performed by the Core Microscopy Facility at The Scripps  
646 Research Institute. For the negative-staining EM analysis of protein nanoparticles, the S2GΔHR2-  
647 10GS-I3-01v9-L7P SApNP samples were prepared at the concentration of 0.01 mg/ml. Carbon-  
648 coated copper grids (400 mesh) were glow-discharged, and 10 μl of each sample was adsorbed for  
649 2 min. Excess sample was wicked away, and grids were negatively stained with 2% uranyl formate  
650 for 2 min. Excess stain was wicked away and the grids were allowed to dry. For the EM analysis  
651 of mouse tissues, the lymph nodes were dissected from each animal and immersed in oxygenated  
652 2.5% glutaraldehyde and 4% paraformaldehyde in 0.1M Na cacodylate buffer (pH 7.4) fixative  
653 overnight at 4°C (139). After washing in 0.1 M sodium cacodylate buffer, the tissue samples were  
654 post-fixed in buffered 1% osmium tetroxide and 1.5% potassium ferrocyanide for 1-1.5 h at 4°C,

655 rinsed in the same buffer, and then stained *en bloc* with 0.5% uranyl acetate overnight at 4°C. The  
656 tissue samples were washed in double-distilled H<sub>2</sub>O and dehydrated through a graded series of  
657 ethanol followed by acetone, infiltrated with LX-112 (Ladd) epoxy resin, and polymerized at 60°C.  
658 Ultrathin lymph node sections (at 70-nm thickness) were prepared for imaging. Samples were  
659 analyzed at 80 kV with a Talos L120C transmission electron microscope (Thermo Fisher), and  
660 images were acquired with a CETA 16M CMOS camera.

### 661 **Lymph node disaggregation, cell staining, and flow cytometry**

662 Germinal center reactions, including the percentage of GC B cells (GL7<sup>+</sup>B220<sup>+</sup>) and T<sub>fh</sub> cells  
663 (CD3<sup>+</sup>CD4<sup>+</sup>CXCR5<sup>+</sup>PD1<sup>+</sup>), and the number of GC B cells and T<sub>fh</sub> cells were studied by flow  
664 cytometry (**fig. S5A**). The mice were sacrificed 2, 5, and 8 weeks after a single-dose and 2 and 5  
665 weeks after the boost immunization. Fresh axillary, brachial, and popliteal sentinel lymph nodes  
666 were collected and mechanically disaggregated. These lymph node samples were merged in  
667 enzyme digestion solution containing 958 µl of Hanks' balanced salt solution (HBSS) buffer  
668 (Thermo Fisher Scientific, catalog no. 14185052), 40 µl of 10 mg/ml collagenase IV (Sigma-  
669 Aldrich, catalog no. C5138), and 2 µl of 10 mg/ml of DNase (Roche, catalog no. 10104159001) in  
670 an Eppendorf tube. After incubation at 37°C for 30 min, lymph node samples were filtered through  
671 a 70 µm cell strainer and spun down at 400 × *g* for 10 min. The supernatant was discarded, and the  
672 cell pellet was resuspended in HBSS blocking solution containing 0.5% (w/v) bovine serum  
673 albumin and 2 mM EDTA. The nonspecific binding of Fc receptors was blocked using anti-  
674 CD16/32 antibody (BioLegend, catalog no. 101302) on ice for 30 min. Cocktail antibodies,  
675 Zombie NIR live/dead stain (BioLegend, catalog no. 423106), Brilliant Violet 510 anti-  
676 mouse/human CD45R/B220 antibody (BioLegend, catalog no. 103247), FITC anti-mouse CD3  
677 antibody (BioLegend, catalog no. 100204), Alexa Fluor 700 anti-mouse CD4 antibody

678 (BioLegend, catalog no. 100536), PE anti-mouse/human GL7 antibody (BioLegend, catalog no.  
679 144608), Brilliant Violet 605 anti-mouse CD95 (Fas) antibody (BioLegend, catalog no. 152612),  
680 Brilliant Violet 421 anti-mouse CD185 (CXCR5) antibody (BioLegend, catalog no. 145511), and  
681 PE/Cyanine7 anti-mouse CD279 (PD-1) antibody (BioLegend, catalog no. 135216) were then  
682 mixed with the cells and placed on ice for 30 min. After washing cells with HBSS blocking solution  
683 after antibody staining, the samples were fixed using 1.6% paraformaldehyde (Thermo Fisher  
684 Scientific, catalog no. 28906) in HBSS on ice for 30 min. The cell samples were stored in HBSS  
685 blocking solution for the flow cytometry study. Sample events were acquired by a 5-laser BD  
686 Biosciences LSR II analytical flow cytometer with BD FACS Diva 6 software at the Core Facility  
687 of The Scripps Research Institute. The data were further processed using FlowJo 10 software.

#### 688 **DC production, T cell culture, activation, and flow cytometry analysis**

689 Mouse bone marrow (BM) was cultured in RPMI 1640 medium containing 10% fetal bovine serum  
690 and recombinant mouse Flt3L (50 ng/mL) and SCF (10 ng/ml) for 9 days as described (*140*). To  
691 induce DC activation, immature DCs were incubated with lipopolysaccharide (LPS, 100 ng/mL)  
692 plus R848 (Resiquimod, 100 ng/mL) overnight, which activated TLR4 or TLR7/8 signaling,  
693 respectively. Cells were harvested for experiments. CD11c<sup>+</sup> DCs were sorted using magnetic beads  
694 (Miltenyi-Biotech, CA). Splenic mononuclear cells from each group of immunized mice were  
695 cultured in the presence of DCs pulsed with or without I3-01v9 SApNP ( $1 \times 10^{-7}$  mM) in complete  
696 IMDM medium containing IL-2 (5.0 ng/ml). Cells were collected 16 h later for intracellular  
697 cytokine staining and flow cytometry. All antibodies used for immunofluorescence staining were  
698 purchased from eBioscience (San Diego, CA), BioLegend (San Diego, CA) or BD Biosciences  
699 (San Jose, CA). Magnetic microbead-conjugated streptavidin was purchased from Miltenyi-  
700 Biotech (Auburn, CA). Recombinant human IL-2 protein was purchased from R&D Systems

701 (Minneapolis, MN). Recombinant mouse Flt3 ligand (Flt3L) and mouse SCF were purchased from  
702 Shenandoah Biotech (Warwick, PA). Cells were stained with appropriate concentrations of mAbs.  
703 Dead cells were excluded using Fixable Viability Dye from eBioscience (San Diego, CA). Flow  
704 cytometry was performed using LSRII (BD Bioscience, CA).

#### 705 **Bulk and single-cell sorting of SARS-CoV-2 antigen-specific mouse B cells.**

706 Spleens or lymph nodes were harvested from mice 15 days after the last immunization, and the  
707 cell suspension was prepared. Dead cells were excluded by staining with the Fixable Aqua Dead  
708 Cell Stain kit (Thermo Fisher L34957). Fc $\gamma$ III (CD16) and Fc $\gamma$ II (CD32) receptors were blocked  
709 by adding 20  $\mu$ l of 2.4G2 mAb (BD Pharmigen, catalog no. N553142). The cells were then  
710 incubated with 10  $\mu$ g of a biotinylated RBD-5GS-foldon-Avi trimer or a biotinylated S2G $\Delta$ HR2-  
711 5GS-foldon-Avi spike. Briefly, the probes were generated by the biotinylation of Avi-tagged  
712 SARS-CoV-2 antigens using biotin ligase BirA according to the manufacturer's instructions  
713 (Avidity). Biotin excess was removed by SEC on either a Superdex 200 10/300 column (GE  
714 Healthcare) for the RBD probe or a HiLoad Superose 6 16/600 column (GE Healthcare) for the  
715 spike probe. In the SEC profiles, the probe peak was well separated from the peak of biotin ligase  
716 (**fig. S3A**). Cells and biotinylated proteins were incubated for 5 min at 4  $^{\circ}$ C, followed by the  
717 addition of 2.5  $\mu$ l of anti-mouse IgG fluorescently labeled with FITC (Jackson ImmunoResearch  
718 catalog no. 115-095-071) and incubated for 15 min at 4  $^{\circ}$ C. Finally, 5  $\mu$ l of premium-grade  
719 allophycocyanin (APC)-labeled streptavidin was added to the cells and incubated for 15 min at 4  
720  $^{\circ}$ C. In each step, the cells were washed with 0.5 ml of PBS and the sorting buffer, PBS with 2%  
721 FBS. FITC $^{+}$  APC $^{+}$  probe-specific B cells were sorted using MoFloAstrios EQ (Beckman Coulter).  
722 For bulk sorting, positive cells were sorted into an Eppendorf microtube with 20  $\mu$ l of lysis buffer.  
723 For single B-cell sorting, individual positive cells were sorted into the inner wells of a 96-well



724 plate with 20  $\mu$ l of pre-reverse transcription (RT) lysis mix containing 0.1  $\mu$ l of NP40 (Sigma-  
725 Aldrich), 0.5  $\mu$ l of RNase Inhibitor (Thermo Fisher), 5  $\mu$ l of 5 $\times$  First Strand Buffer, and 1.25  $\mu$ l  
726 of DTT from SuperScript IV kit (Invitrogen), with 13.15  $\mu$ l of H<sub>2</sub>O per well.

### 727 **Antibody cloning from Env-specific single B cells and antibody production.**

728 The antibody cloning of SARS-CoV2-2 antigen-sorted single B cells was conducted as follows. A  
729 mix containing 3  $\mu$ l of Random Hexamers (GeneLink), 2  $\mu$ l of dNTPs, and 1  $\mu$ l of SuperScript IV  
730 enzyme (Thermo Fisher) was added to each well of a single-cell-sorted 96-well plate that  
731 underwent thermocycling according to the program outlined in the SuperScript IV protocol,  
732 resulting in 25  $\mu$ l of cDNA for each single cell. cDNA (5  $\mu$ l) was then added to a polymerase chain  
733 reaction (PCR) mix containing 12.5  $\mu$ l of 2 $\times$  Multiplex PCR mix (Qiagen), 9  $\mu$ l of H<sub>2</sub>O, 0.5  $\mu$ l of  
734 forward primer mix, and 0.5  $\mu$ l of reverse mouse primer mix (*I41*) for heavy and  $\kappa$ -light chains  
735 within each well. A second PCR reaction was then performed using 5  $\mu$ l of the first PCR as the  
736 template and respective mouse primers (*I41*) according to the same recipe as the first PCR. The  
737 PCR products were run on 1% Agarose gel and those with correct heavy and light chain bands  
738 were then used for Gibson ligation (New England Biolabs), cloning into human IgG expression  
739 vectors, and transformation into competent cells. Mouse mAbs were expressed by the transient  
740 transfection of ExpiCHO cells (Thermo Fisher) with equal amounts of paired heavy and  $\kappa$ -light  
741 chain plasmids. Antibody proteins were purified from the culture supernatant after 12-14 days  
742 using Protein A bead columns (Thermo Fisher).

### 743 **NGS and bioinformatics analysis of mouse B cells.**

744 Previously, a 5'-rapid amplification of cDNA ends (RACE)-PCR protocol was reported for the  
745 unbiased sequencing of mouse B-cell repertoires (84). In the present study, this protocol was

746 applied to analyze bulk-sorted, RBD/spike-specific mouse B cells. Briefly, 5'-RACE cDNA was  
747 obtained from bulk-sorted B cells of each mouse with the SMART-Seq v4 Ultra Low Input RNA  
748 Kit for Sequencing (TaKaRa). The IgG PCRs were set up with Platinum *Taq* High-Fidelity DNA  
749 Polymerase (Life Technologies) in a total volume of 50  $\mu$ l, with 5  $\mu$ l of cDNA as the template, 1  
750  $\mu$ l of 5'-RACE primer, and 1  $\mu$ l of 10  $\mu$ M reverse primer. The 5'-RACE primer contained a  
751 PGM/S5 P1 adaptor, and the reverse primer contained a PGM/S5 A adaptor. We adapted the mouse  
752 3'-C $\gamma$ 1-3/3'-C $\mu$  inner primers and 3'-mC $\kappa$  outer primer (141) as reverse primers for the 5'-RACE  
753 PCR processing of heavy and  $\kappa$ -light chains. A total of 25 cycles of PCR was performed and the  
754 expected PCR products (500-600 bp) were gel purified (Qiagen). NGS was performed on the Ion  
755 S5 GeneStudio system. Briefly, heavy and  $\kappa$ -light chain libraries from the same mouse were  
756 quantitated using a Qubit® 2.0 Fluorometer with Qubit® dsDNA HS Assay Kit and then mixed at  
757 a 3:1 ratio before being pooled with antibody libraries of other mice at an equal ratio for  
758 sequencing. Template preparation and (Ion 530) chip loading were performed on Ion Chef using  
759 the Ion 520/530 Ext Kit, followed by sequencing on the Ion S5 system with default settings. The  
760 mouse Antibodyomics pipeline (84). was used to process raw NGS data, derive quantitative  
761 profiles for germline gene usage, degree of SHM, and H/KCDR3 loop length, and generate 2D  
762 divergence/identity plots to visualize mAbs in their respective repertoires.

### 763 **Statistical analysis**

764 Data were collected from 4-7 mice per group. All of the statistical analyses were performed and  
765 graphs were generated using GraphPad Prism 6.01 software. For the antibody analysis,  
766 comparisons between different vaccine groups were performed using two-tailed unpaired  
767 Student's *t*-test. Comparisons of neutralizing antibody titers against SARS-CoV-2 variants were  
768 performed using the same plasma samples and analyzed using two-tailed paired Student's *t*-test.

769 For the vaccine accumulation and GC study as well as the adjuvant study, comparisons between  
770 different vaccine groups were performed using one-way analysis of variance (ANOVA) followed  
771 by Tukey's multiple comparison *post hoc* test. Statistical significance was determined as ns: not  
772 significant, \* $p < 0.05$ , \*\* $p < 0.01$ , \*\*\* $p < 0.001$ , \*\*\*\* $p < 0.0001$ .

773

## 774 SUPPLEMENTARY MATERIALS

775 Supplementary material for this article is available at <http://xxx/xxx/xxx>.

776 **fig. S1.** Spike and spike-presenting SApNP vaccine-induced neutralizing antibody responses  
777 against the wildtype SARS-CoV-2 strain and three variants of concern (VOCs).

778 **fig. S2.** Neutralizing antibody responses against the wildtype SARS-CoV-2 strain and three VOCs  
779 induced by the S2GΔHR2-10GS-I3-01v9-L7P SApNP formulated with different adjuvants.

780 **fig. S3.** Single-cell isolation and functional evaluation of monoclonal neutralizing antibodies from  
781 mice immunized with the RBD, spike, and SApNP vaccines.

782 **fig. S4.** Unbiased repertoire analysis of bulk-sorted SARS-CoV-2 antigen-specific mouse splenic  
783 B cells and tracing of mouse neutralizing antibodies in the NGS-derived repertoires.

784 **fig. S5.** SARS-CoV-2 spike-presenting SApNP interaction with macrophages in a lymph node.

785 **fig. S6.** TEM images of SARS-CoV-2 spike-presenting I3-01v9 SApNP interaction with FDCs in  
786 a lymph node.

787 **fig. S7.** Immunohistological analysis of SARS-CoV-2 spike/spike-presenting SApNP vaccine-  
788 induced GCs.

789 **fig. S8.** Flow cytometry analysis of SARS-CoV-2 spike/spike-presenting SApNP vaccine-induced  
790 GCs.

791 **fig. S9.** Adjuvant effect on SARS-CoV-2 spike/spike-presenting SApNP vaccine-induced GCs.

792 **fig. S10.** NGS analysis of SARS-CoV-2 spike-specific lymph node (LN) B cells from mice  
793 immunized with the spike and SApNP vaccines.

794  
795  
796  
797  
798  
799  
800  
801  
802  
803  
804  
805  
806  
807  
808  
809  
810  
811  
812  
813  
814  
815  
816  
817  
818  
819  
820  
821  
822  
823  
824  
825  
826  
827  
828  
829  
830  
831  
832  
833  
834  
835  
836  
837  
838  
839

## References

1. J. M. Dan *et al.*, Immunological memory to SARS-CoV-2 assessed for up to 8 months after infection. *Science* **371**, eabf4063 (2021).
2. B. Isho *et al.*, Persistence of serum and saliva antibody responses to SARS-CoV-2 spike antigens in COVID-19 patients. *Sci. Immunol.* **5**, eabe5511 (2020).
3. A. S. Iyer *et al.*, Persistence and decay of human antibody responses to the receptor binding domain of SARS-CoV-2 spike protein in COVID-19 patients. *Sci. Immunol.* **5**, eabe0367 (2020).
4. Y. Chen *et al.*, Quick COVID-19 healers sustain anti-SARS-CoV-2 antibody production. *Cell* **183**, 1496-1507.e1416 (2020).
5. S. Marot *et al.*, Rapid decline of neutralizing antibodies against SARS-CoV-2 among infected healthcare workers. *Nat. Commun.* **12**, 844 (2021).
6. R. Burioni, E. J. Topol, Assessing the human immune response to SARS-CoV-2 variants. *Nat. Med.*, Published Ahead-of-Print (2021).
7. H. Tegally *et al.*, Emergence of a SARS-CoV-2 variant of concern with mutations in spike glycoprotein. *Nature*, Published Ahead-of-Print (2021).
8. R. Challen *et al.*, Risk of mortality in patients infected with SARS-CoV-2 variant of concern 202012/1: matched cohort study. *BMJ* **372**, n579 (2021).
9. T. Kirby, New variant of SARS-CoV-2 in UK causes surge of COVID-19. *Lancet Respir. Med.* **9**, e20-e21 (2021).
10. N. G. Davies *et al.*, Estimated transmissibility and impact of SARS-CoV-2 lineage B.1.1.7 in England. *Science*, eabg3055 (2021).
11. N. L. Washington *et al.*, Genomic epidemiology identifies emergence and rapid transmission of SARS-CoV-2 B.1.1.7 in the United States. *medRxiv*, 2021.2002.2006.21251159 (2021).
12. E. C. Sabino *et al.*, Resurgence of COVID-19 in Manaus, Brazil, despite high seroprevalence. *Lancet* **397**, 452-455 (2021).
13. N. R. Faria *et al.*, Genomics and epidemiology of a novel SARS-CoV-2 lineage in Manaus, Brazil. *medRxiv*, 2021.2002.2026.21252554 (2021).
14. J. R. Mascola, B. S. Graham, A. S. Fauci, SARS-CoV-2 viral variants—tackling a moving target. *JAMA*, Published Ahead-of-Print (2021).
15. S. Cherian *et al.*, Convergent evolution of SARS-CoV-2 spike mutations, L452R, E484Q and P681R, in the second wave of COVID-19 in Maharashtra, India. *bioRxiv*, 2021.2004.2022.440932 (2021).
16. C. Zimmer, J. Corum, W. S.-L., in *Coronavirus vaccine tracker*. (<https://www.nytimes.com/interactive/2020/science/coronavirus-vaccine-tracker.html>).
17. N. Dagan *et al.*, BNT162b2 mRNA Covid-19 vaccine in a nationwide mass vaccination setting. *N. Engl. J. Med.*, Published Ahead-of-Print (2021).
18. L. R. Baden *et al.*, Efficacy and safety of the mRNA-1273 SARS-CoV-2 vaccine. *N. Engl. J. Med.* **384**, 403-416 (2020).
19. T. C. Williams, W. A. Burgers, SARS-CoV-2 evolution and vaccines: cause for concern? *Lancet Respir. Med.*, Published Ahead-of-Print (2021).
20. D. Y. Logunov *et al.*, Safety and efficacy of an rAd26 and rAd5 vector-based heterologous prime-boost COVID-19 vaccine: an interim analysis of a randomised controlled phase 3 trial in Russia. *Lancet* **397**, 671-681 (2021).

- 840 21. F. P. Polack *et al.*, Safety and efficacy of the BNT162b2 mRNA Covid-19 vaccine. *N.*  
841 *Engl. J. Med.* **383**, 2603-2615 (2020).
- 842 22. Q. Li *et al.*, The impact of mutations in SARS-CoV-2 spike on viral infectivity and  
843 antigenicity. *Cell* **182**, 1284-1294.e1289 (2020).
- 844 23. C. Rees-Spear *et al.*, The impact of spike mutations on SARS-CoV-2 neutralization.  
845 *bioRxiv*, 2021.2001.2015.426849 (2021).
- 846 24. C. K. Wibmer *et al.*, SARS-CoV-2 501Y.V2 escapes neutralization by South African  
847 COVID-19 donor plasma. *bioRxiv*, 2021.2001.2018.427166 (2021).
- 848 25. D. R. Burton, E. J. Topol, Variant-proof vaccines - invest now for the next pandemic.  
849 *Nature* **590**, 386-388 (2021).
- 850 26. M. Voysey *et al.*, Safety and efficacy of the ChAdOx1 nCoV-19 vaccine (AZD1222)  
851 against SARS-CoV-2: an interim analysis of four randomised controlled trials in Brazil,  
852 South Africa, and the UK. *Lancet* **397**, 99-111 (2021).
- 853 27. E. Andreano *et al.*, SARS-CoV-2 escape in vitro from a highly neutralizing COVID-19  
854 convalescent plasma. *bioRxiv*, 2020.2012.2028.424451 (2020).
- 855 28. M. Hoffmann *et al.*, SARS-CoV-2 variants B.1.351 and P.1 escape from neutralizing  
856 antibodies. *Cell*, Published Ahead-of-Print (2021).
- 857 29. W. F. Garcia-Beltran *et al.*, Multiple SARS-CoV-2 variants escape neutralization by  
858 vaccine-induced humoral immunity. *Cell*, Published Ahead-of-Print (2021).
- 859 30. P. Wang *et al.*, Antibody resistance of SARS-CoV-2 variants B.1.351 and B.1.1.7. *bioRxiv*,  
860 2021.2001.2025.428137 (2021).
- 861 31. P. Supasa *et al.*, Reduced neutralization of SARS-CoV-2 B.1.1.7 variant by convalescent  
862 and vaccine sera. *Cell*, Published Ahead-of-Print (2021).
- 863 32. D. A. Collier *et al.*, SARS-CoV-2 B.1.1.7 sensitivity to mRNA vaccine-elicited,  
864 convalescent and monoclonal antibodies. *medRxiv*, 2021.2001.2019.21249840 (2021).
- 865 33. Z. Wang *et al.*, mRNA vaccine-elicited antibodies to SARS-CoV-2 and circulating  
866 variants. *Nature*, Published Ahead-of-Print (2021).
- 867 34. Q. Li *et al.*, No higher infectivity but immune escape of SARS-CoV-2 501Y.V2 variants.  
868 *Cell*, Published Ahead-of-Print (2021).
- 869 35. A. Singh, Eliciting B cell immunity against infectious diseases using nanovaccines. *Nat.*  
870 *Nanotechnol.* **16**, 16-24 (2021).
- 871 36. G. D. Victora, M. C. Nussenzweig, Germinal centers. *Annu. Rev. Immunol.* **30**, 429-457  
872 (2012).
- 873 37. R. Rappuoli, Glycoconjugate vaccines: principles and mechanisms. *Sci. Transl. Med.* **10**,  
874 eaat4615 (2018).
- 875 38. J. G. Cyster, C. D. C. Allen, B cell responses: cell interaction dynamics and decisions. *Cell*  
876 **177**, 524-540 (2019).
- 877 39. M. McHeyzer-Williams, S. Okitsu, N. Wang, L. McHeyzer-Williams, Molecular  
878 programming of B cell memory. *Nat. Rev. Immunol.* **12**, 24-34 (2012).
- 879 40. M. Akkaya, K. Kwak, S. K. Pierce, B cell memory: building two walls of protection against  
880 pathogens. *Nat. Rev. Immunol.* **20**, 229-238 (2020).
- 881 41. N. S. De Silva, U. Klein, Dynamics of B cells in germinal centres. *Nat. Rev. Immunol.* **15**,  
882 137-148 (2015).
- 883 42. O. Bannard, J. G. Cyster, Germinal centers: programmed for affinity maturation and  
884 antibody diversification. *Curr. Opin. Immunol.* **45**, 21-30 (2017).

- 885 43. P. A. Robert, A. L. J. Marschall, M. Meyer-Hermann, Induction of broadly neutralizing  
886 antibodies in germinal centre simulations. *Curr. Opin. Biotechnol.* **51**, 137-145 (2018).
- 887 44. H. H. Tam *et al.*, Sustained antigen availability during germinal center initiation enhances  
888 antibody responses to vaccination. *Proc. Natl. Acad. Sci. U.S.A.* **113**, E6639-E6648 (2016).
- 889 45. K. M. Cirelli *et al.*, Slow delivery immunization enhances HIV neutralizing antibody and  
890 germinal center responses via modulation of immunodominance. *Cell* **177**, 1153-  
891 1171.e1128 (2019).
- 892 46. D. R. Burton, L. Hangartner, Broadly neutralizing antibodies to HIV and their role in  
893 vaccine design. *Annu. Rev. Immunol.* **34**, 635-659 (2016).
- 894 47. L. He *et al.*, Single-component, self-assembling, protein nanoparticles presenting the  
895 receptor binding domain and stabilized spike as SARS-CoV-2 vaccine candidates. *Sci. Adv.*  
896 **7**, eabf1591 (2021).
- 897 48. D. Wrapp *et al.*, Cryo-EM structure of the 2019-nCoV spike in the prefusion conformation.  
898 *Science* **367**, 1260-1263 (2020).
- 899 49. K. H. D. Crawford *et al.*, Protocol and reagents for pseudotyping lentiviral particles with  
900 SARS-CoV-2 spike protein for neutralization assays. *Viruses* **12**, 513 (2020).
- 901 50. A. M. Sholukh *et al.*, Evaluation of SARS-CoV-2 neutralization assays for antibody  
902 monitoring in natural infection and vaccine trials. *medRxiv*, 2020.2012.2007.20245431  
903 (2020).
- 904 51. D. Pinto *et al.*, Cross-neutralization of SARS-CoV-2 by a human monoclonal SARS-CoV  
905 antibody. *Nature* **583**, 290-295 (2020).
- 906 52. B. Pulendran, R. Ahmed, Translating innate immunity into immunological memory:  
907 implications for vaccine development. *Cell* **124**, 849-863 (2006).
- 908 53. S. G. Reed, M. T. Orr, C. B. Fox, Key roles of adjuvants in modern vaccines. *Nat. Med.*  
909 **19**, 1597-1608 (2013).
- 910 54. B. Pulendran, S. A. P, D. T. O'Hagan, Emerging concepts in the science of vaccine  
911 adjuvants. *Nat. Rev. Drug Discov.*, Published Ahead-of-Print (2021).
- 912 55. P. S. Arunachalam *et al.*, Adjuvanting a subunit COVID-19 vaccine to induce protective  
913 immunity. *Nature*, Published Ahead-of-Print (2021).
- 914 56. B. Pulendran, R. Ahmed, Immunological mechanisms of vaccination. *Nat. Immunol.* **12**,  
915 509-517 (2011).
- 916 57. K. A. Fitzgerald, J. C. Kagan, Toll-like receptors and the control of immunity. *Cell* **180**,  
917 1044-1066 (2020).
- 918 58. T. Kawai, S. Akira, The role of pattern-recognition receptors in innate immunity: update  
919 on Toll-like receptors. *Nat. Immunol.* **11**, 373-384 (2010).
- 920 59. S. P. Kasturi *et al.*, Programming the magnitude and persistence of antibody responses with  
921 innate immunity. *Nature* **470**, 543-547 (2011).
- 922 60. T. J. Moyer *et al.*, Engineered immunogen binding to alum adjuvant enhances humoral  
923 immunity. *Nat. Med.* **26**, 430-440 (2020).
- 924 61. T. L. Flach *et al.*, Alum interaction with dendritic cell membrane lipids is essential for its  
925 adjuvanticity. *Nat. Med.* **17**, 479-487 (2011).
- 926 62. P. J. Hotez, D. B. Corry, U. Strych, M. E. Bottazzi, COVID-19 vaccines: neutralizing  
927 antibodies and the alum advantage. *Nat. Rev. Immunol.* **20**, 399-400 (2020).
- 928 63. D. T. O'Hagan, G. S. Ott, G. V. Nest, R. Rappuoli, G. D. Giudice, The history of MF59(®)  
929 adjuvant: a phoenix that arose from the ashes. *Expert Rev. Vaccines* **12**, 13-30 (2013).

- 930 64. R. Cantisani *et al.*, Vaccine adjuvant MF59 promotes retention of unprocessed antigen in  
931 lymph node macrophage compartments and follicular dendritic cells. *J. Immunol.* **194**,  
932 1717-1725 (2015).
- 933 65. H. Ishikawa, G. N. Barber, STING is an endoplasmic reticulum adaptor that facilitates  
934 innate immune signalling. *Nature* **455**, 674-678 (2008).
- 935 66. H. Ishikawa, Z. Ma, G. N. Barber, STING regulates intracellular DNA-mediated, type I  
936 interferon-dependent innate immunity. *Nature* **461**, 788-792 (2009).
- 937 67. G. N. Barber, STING: infection, inflammation and cancer. *Nat. Rev. Immunol.* **15**, 760-770  
938 (2015).
- 939 68. B. Guy, The perfect mix: recent progress in adjuvant research. *Nat. Rev. Microbiol.* **5**, 396-  
940 397 (2007).
- 941 69. M. S. Duthie, H. P. Windish, C. B. Fox, S. G. Reed, Use of defined TLR ligands as  
942 adjuvants within human vaccines. *Immunol. Rev.* **239**, 178-196 (2011).
- 943 70. M. C. Hanson *et al.*, Nanoparticulate STING agonists are potent lymph node-targeted  
944 vaccine adjuvants. *J. Clin. Invest.* **125**, 2532-2546 (2015).
- 945 71. M. P. Steinbuck *et al.*, A lymph node-targeted Amphiphile vaccine induces potent cellular  
946 and humoral immunity to SARS-CoV-2. *Sci. Adv.* **7**, eabe5819 (2021).
- 947 72. D. S. Wilson *et al.*, Antigens reversibly conjugated to a polymeric glyco-adjuvant induce  
948 protective humoral and cellular immunity. *Nat. Mater.* **18**, 175-185 (2019).
- 949 73. E. Tonti *et al.*, Bisphosphonates target B cells to enhance humoral immune responses. *Cell*  
950 *Rep.* **5**, 323-330 (2013).
- 951 74. F. G. Delemarre, N. Kors, N. van Rooijen, The in situ immune response in popliteal lymph  
952 nodes of mice after macrophage depletion. Differential effects of macrophages on thymus-  
953 dependent and thymus-independent immune responses. *Immunobiology* **180**, 395-404  
954 (1990).
- 955 75. Y.-N. Zhang, W. Poon, E. Sefton, W. C. W. Chan, Suppressing subcapsular sinus  
956 macrophages enhances transport of nanovaccines to lymph node follicles for robust  
957 humoral immunity. *ACS Nano* **14**, 9478-9490 (2020).
- 958 76. J. G. Liang *et al.*, S-Trimer, a COVID-19 subunit vaccine candidate, induces protective  
959 immunity in nonhuman primates. *Nat. Commun.* **12**, 1346 (2021).
- 960 77. P. Richmond *et al.*, Safety and immunogenicity of S-Trimer (SCB-2019), a protein subunit  
961 vaccine candidate for COVID-19 in healthy adults: a phase 1, randomised, double-blind,  
962 placebo-controlled trial. *Lancet* **397**, 682-694 (2021).
- 963 78. E. S. Rosenberg *et al.*, Vigorous HIV-1-specific CD4+ T cell responses associated with  
964 control of viremia. *Science* **278**, 1447-1450 (1997).
- 965 79. L. M. Snell *et al.*, Overcoming CD4 Th1 cell fate restrictions to sustain antiviral CD8 T  
966 cells and control persistent virus infection. *Cell Rep.* **16**, 3286-3296 (2016).
- 967 80. J. Zhu, H. Yamane, W. E. Paul, Differentiation of effector CD4 T cell populations (\*).  
968 *Annu. Rev. Immunol.* **28**, 445-489 (2010).
- 969 81. S. Kumar *et al.*, Neutralizing antibodies induced by first-generation gp41-stabilized HIV-  
970 1 envelope trimers and nanoparticles. *bioRxiv*, 2020.2012.2002.408328 (2020).
- 971 82. R. Shi *et al.*, A human neutralizing antibody targets the receptor-binding site of SARS-  
972 CoV-2. *Nature* **584**, 120-124 (2020).
- 973 83. T. F. Rogers *et al.*, Isolation of potent SARS-CoV-2 neutralizing antibodies and protection  
974 from disease in a small animal model. *Science* **369**, 956-963 (2020).



- 975 84. C. D. Morris *et al.*, Differential antibody responses to conserved HIV-1 neutralizing  
976 epitopes in the context of multivalent scaffolds and native-like gp140 trimers. *mBio* **8**,  
977 e00036-00017 (2017).
- 978 85. F. Chen *et al.*, Functional convergence of a germline-encoded neutralizing antibody  
979 response in rhesus macaques immunized with HCV envelope glycoproteins. *Immunity* **54**,  
980 781-796.e784 (2021).
- 981 86. G. P. Wen *et al.*, Quantitative evaluation of protective antibody response induced by  
982 hepatitis E vaccine in humans. *Nat. Commun.* **11**, 3971 (2020).
- 983 87. B. Ju *et al.*, Human neutralizing antibodies elicited by SARS-CoV-2 infection. *Nature* **584**,  
984 115-119 (2020).
- 985 88. Y.-N. Zhang *et al.*, Nanoparticle size influences antigen retention and presentation in  
986 lymph node follicles for humoral immunity. *Nano Lett.* **19**, 7226-7235 (2019).
- 987 89. K. M. Cirelli, S. Crotty, Germinal center enhancement by extended antigen availability.  
988 *Curr. Opin. Immunol.* **47**, 64-69 (2017).
- 989 90. B. A. Heesters, R. C. Myers, M. C. Carroll, Follicular dendritic cells: dynamic antigen  
990 libraries. *Nat. Rev. Immunol.* **14**, 495-504 (2014).
- 991 91. J. G. Cyster, B cell follicles and antigen encounters of the third kind. *Nat. Immunol.* **11**,  
992 989-996 (2010).
- 993 92. F. D. Batista, N. E. Harwood, The who, how and where of antigen presentation to B cells.  
994 *Nat. Rev. Immunol.* **9**, 15-27 (2009).
- 995 93. M. Kuka, M. Iannacone, Viral subversion of B cell responses within secondary lymphoid  
996 organs. *Nat. Rev. Immunol.* **18**, 255-265 (2018).
- 997 94. R. Rappuoli, D. Serruto, Self-assembling nanoparticles usher in a new era of vaccine  
998 design. *Cell* **176**, 1245-1247 (2019).
- 999 95. C. D. C. Allen, T. Okada, J. G. Cyster, Germinal-center organization and cellular dynamics.  
1000 *Immunity* **27**, 190-202 (2007).
- 1001 96. C. D. C. Allen, J. G. Cyster, Follicular dendritic cell networks of primary follicles and  
1002 germinal centers: Phenotype and function. *Semin. Immunol.* **20**, 14-25 (2008).
- 1003 97. L. Mesin, J. Ersching, Gabriel D. Victora, Germinal center B cell dynamics. *Immunity* **45**,  
1004 471-482 (2016).
- 1005 98. N. Baumgarth, The shaping of a B cell pool maximally responsive to infections. *Annu. Rev.*  
1006 *Immunol.* **39**, (2021).
- 1007 99. J. López-Sagaseta, E. Malito, R. Rappuoli, M. J. Bottomley, Self-assembling protein  
1008 nanoparticles in the design of vaccines. *Comput. Struct. Biotechnol. J.* **14**, 58-68 (2016).
- 1009 100. D. J. Irvine, M. C. Hanson, K. Rakhra, T. Tokatlian, Synthetic nanoparticles for vaccines  
1010 and immunotherapy. *Chem. Rev.* **115**, 11109-11146 (2015).
- 1011 101. D. J. Irvine, M. A. Swartz, G. L. Szeto, Engineering synthetic vaccines using cues from  
1012 natural immunity. *Nat. Mater.* **12**, 978-990 (2013).
- 1013 102. Y. Kato *et al.*, Multifaceted effects of antigen valency on B cell response composition and  
1014 differentiation in vivo. *Immunity* **53**, 548-563.e548 (2020).
- 1015 103. S. Crotty, Follicular helper CD4 T cells (TFH). *Annu. Rev. Immunol.* **29**, 621-663 (2011).
- 1016 104. A K Szakal, a. M H Kosco, J. G. Tew, Microanatomy of lymphoid tissue during humoral  
1017 immune responses: structure function relationships. *Annu. Rev. Immunol.* **7**, 91-109 (1989).
- 1018 105. J. Merkenschlager *et al.*, Dynamic regulation of TFH selection during the germinal centre  
1019 reaction. *Nature* **591**, 458-463 (2021).

- 1020 106. Z. Shulman *et al.*, T follicular helper cell dynamics in germinal centers. *Science* **341**, 673-  
1021 677 (2013).
- 1022 107. C. Viant *et al.*, Antibody affinity shapes the choice between memory and germinal center  
1023 B cell fates. *Cell* **183**, 1298-1311.e1211 (2020).
- 1024 108. K. Lederer *et al.*, SARS-CoV-2 mRNA vaccines foster potent antigen-specific germinal  
1025 center responses associated with neutralizing antibody generation. *Immunity* **53**, 1281-  
1026 1295.e1285 (2020).
- 1027 109. G. S. Shukla, Y. J. Sun, S. C. Pero, G. S. Sholler, D. N. Krag, Immunization with tumor  
1028 neoantigens displayed on T7 phage nanoparticles elicits plasma antibody and vaccine-  
1029 draining lymph node B cell responses. *J. Immunol. Methods* **460**, 51-62 (2018).
- 1030 110. L. He *et al.*, Proof of concept for rational design of hepatitis C virus E2 core nanoparticle  
1031 vaccines. *Sci. Adv.* **6**, eaaz6225 (2020).
- 1032 111. A. A. Cohen *et al.*, Mosaic nanoparticles elicit cross-reactive immune responses to  
1033 zoonotic coronaviruses in mice. *Science* **371**, 735-741 (2021).
- 1034 112. A. C. Walls *et al.*, Elicitation of broadly protective sarbecovirus immunity by receptor-  
1035 binding domain nanoparticle vaccines. *bioRxiv*, 2021.2003.2015.435528 (2021).
- 1036 113. R. Rappuoli *et al.*, Vaccinology in the post-COVID-19 era. *Proc. Natl. Acad. Sci. U.S.A.*  
1037 **118**, e2020368118 (2021).
- 1038 114. M. Jeyanathan *et al.*, Immunological considerations for COVID-19 vaccine strategies. *Nat.*  
1039 *Rev. Immunol.* **20**, 615-632 (2020).
- 1040 115. L. Corey, J. R. Mascola, A. S. Fauci, F. S. Collins, A strategic approach to COVID-19  
1041 vaccine R&D. *Science* **368**, 948-950 (2020).
- 1042 116. L. DeFrancesco, Whither COVID-19 vaccines? *Nat. Biotechnol.* **38**, 1132-1145 (2020).
- 1043 117. C. Keech *et al.*, Phase 1–2 trial of a SARS-CoV-2 recombinant spike protein nanoparticle  
1044 vaccine. *N. Engl. J. Med.* **383**, 2320-2332 (2020).
- 1045 118. T. Tokatlian *et al.*, Innate immune recognition of glycans targets HIV nanoparticle  
1046 immunogens to germinal centers. *Science* **363**, 649-654 (2019).
- 1047 119. S. N. Mueller, S. Tian, J. M. DeSimone, Rapid and persistent delivery of antigen by lymph  
1048 node targeting PRINT nanoparticle vaccine carrier to promote humoral immunity. *Mol.*  
1049 *Pharm.* **12**, 1356-1365 (2015).
- 1050 120. B. Zhang *et al.*, A platform incorporating trimeric antigens into self-assembling  
1051 nanoparticles reveals SARS-CoV-2-spike nanoparticles to elicit substantially higher  
1052 neutralizing responses than spike alone. *Sci. Rep.* **10**, 18149 (2020).
- 1053 121. A. C. Walls *et al.*, Elicitation of potent neutralizing antibody responses by designed protein  
1054 nanoparticle vaccines for SARS-CoV-2. *Cell* **183**, 1367-1382.e1317 (2020).
- 1055 122. A. E. Powell *et al.*, A single immunization with spike-functionalized ferritin vaccines  
1056 elicits neutralizing antibody responses against SARS-CoV-2 in mice. *ACS Cent. Sci.* **7**,  
1057 183-199 (2021).
- 1058 123. P. J. M. Brouwer *et al.*, Two-component spike nanoparticle vaccine protects macaques  
1059 from SARS-CoV-2 infection. *Cell* **184**, 1188-1200.e1119 (2021).
- 1060 124. K. S. Park *et al.*, Lipid-based vaccine nanoparticles for induction of humoral immune  
1061 responses against HIV-1 and SARS-CoV-2. *J. Control. Release* **330**, 529-539 (2021).
- 1062 125. Y.-F. Kang *et al.*, Rapid development of SARS-CoV-2 spike protein receptor-binding  
1063 domain self-assembled nanoparticle vaccine candidates. *ACS Nano* **15**, 2738-2752 (2021).

- 1064 126. J. H. Lam *et al.*, Next generation vaccine platform: polymersomes as stable nanocarriers  
1065 for a highly immunogenic and durable SARS-CoV-2 spike protein subunit vaccine.  
1066 *bioRxiv*, 2021.2001.2024.427729 (2021).
- 1067 127. W. C. Huang *et al.*, SARS-CoV-2 RBD neutralizing antibody induction is enhanced by  
1068 particulate vaccination. *Adv. Mater.* **32**, e2005637 (2020).
- 1069 128. T. K. Tan *et al.*, A COVID-19 vaccine candidate using SpyCatcher multimerization of the  
1070 SARS-CoV-2 spike protein receptor-binding domain induces potent neutralising antibody  
1071 responses. *Nat. Commun.* **12**, 542 (2021).
- 1072 129. D. Lainšček *et al.*, Immune response to vaccine candidates based on different types of  
1073 nanoscaffolded RBD domain of the SARS-CoV-2 spike protein. *bioRxiv*,  
1074 2020.2008.2028.244269 (2020).
- 1075 130. X. Ma *et al.*, Nanoparticle vaccines based on the receptor binding domain (RBD) and  
1076 heptad repeat (HR) of SARS-CoV-2 elicit robust protective immune responses. *Immunity*  
1077 **53**, 1315-1330.e1319 (2020).
- 1078 131. N. C. Dalvie *et al.*, Engineered SARS-CoV-2 receptor binding domain improves  
1079 immunogenicity in mice and elicits protective immunity in hamsters. *bioRxiv*,  
1080 2021.2003.2003.433558 (2021).
- 1081 132. I. Quast, D. Tarlinton, B cell memory: understanding COVID-19. *Immunity* **54**, 205-210  
1082 (2021).
- 1083 133. D. J. Irvine, B. J. Read, Shaping humoral immunity to vaccines through antigen-displaying  
1084 nanoparticles. *Curr. Opin. Immunol.* **65**, 1-6 (2020).
- 1085 134. M. D. Shin *et al.*, COVID-19 vaccine development and a potential nanomaterial path  
1086 forward. *Nat. Nanotechnol.* **15**, 646-655 (2020).
- 1087 135. L. He *et al.*, Single-component multilayered self-assembling nanoparticles presenting  
1088 rationally designed glycoprotein trimers as Ebola virus vaccines. *bioRxiv*,  
1089 2020.2008.2022.262634 (2020).
- 1090 136. L. He *et al.*, HIV-1 vaccine design through minimizing envelope metastability. *Sci. Adv.* **4**,  
1091 aau6769 (2018).
- 1092 137. L. Wijaya *et al.*, An accelerated rabies vaccine schedule based on toll-like receptor 3  
1093 (TLR3) agonist PIKA adjuvant augments rabies virus specific antibody and T cell response  
1094 in healthy adult volunteers. *Vaccine* **35**, 1175-1183 (2017).
- 1095 138. C. A. Schneider, W. S. Rasband, K. W. Eliceiri, NIH Image to ImageJ: 25 years of image  
1096 analysis. *Nat. Methods* **9**, 671-675 (2012).
- 1097 139. T. J. Johnson, Glutaraldehyde fixation chemistry: oxygen-consuming reactions. *Eur. J.*  
1098 *Cell Biol.* **45**, 160-169 (1987).
- 1099 140. K. Mochizuki *et al.*, Programming of donor T cells using allogeneic  $\delta$ -like ligand 4-positive  
1100 dendritic cells to reduce GVHD in mice. *Blood* **127**, 3270-3280 (2016).
- 1101 141. T. Tiller, C. E. Busse, H. Wardemann, Cloning and expression of murine Ig genes from  
1102 single B cells. *J. Immunol. Methods* **350**, 183-193 (2009).
- 1103

## 1104 **Acknowledgements**

1105 **Funding:** This work was funded by National Institutes of Health grants AI137472, AI139092 (to  
1106 J.Z.), Ufovax/SFP-2018-0416, Ufovax/SFP-2018-1013, and Ufovax/SFP-2020-0111 (to J.Z.). Y.-

1107 N.Z. thanks the Natural Sciences and Engineering Research Council of Canada (NSERC) for a  
1108 postdoctoral fellowship. We thank V. Bradaschia, K. Duffin, and M. Ganguly at the Centre for  
1109 Phenogenomics for their expertise in histology and immunostaining. We acknowledge the expert  
1110 assistance of S. Henderson, K. Vanderpool, and T. Fassel at the Core Microscopy Facility at The  
1111 Scripps Research Institute. We thank A. Saluk, B. Seegers, and B. Monteverde at the Flow  
1112 Cytometry Core Facility of The Scripps Research Institute for their expertise in flow cytometry.  
1113 The authors thank M. Arends for proofreading the manuscript. **Author contributions:** Project  
1114 design by Y.-N.Z., L.H., and J.Z. SARS-CoV-2 variant plasmid design and processing by L.H.  
1115 and C.S. Antigen production, purification, and basic characterization by T.N., T.F., and L.H.  
1116 Antibody and mouse plasma neutralization by J.P., T.F., and L.H. Mouse immunization, plasma  
1117 collection, and lymph node isolation by Y.-N.Z. Vaccine-induced T-cell response analysis by  
1118 Y.W., C.A., and Y.Z. B cell sorting, antibody cloning, and synthesis by C.S. and L.H. Antibody  
1119 expression, purification, and ELISA by C.S. and T.N. NGS and bioinformatics by L.H. and J.Z.  
1120 Immunohistology, TEM, and flow cytometry by Y.-N.Z. Manuscript written by Y.-N.Z., Y.Z.,  
1121 L.H., and J.Z. All authors commented on the manuscript. This is manuscript number 30082 from  
1122 The Scripps Research Institute. **Competing interests:** The authors declare no competing interests.  
1123 **Data and material availability:** All data are available in the main text or in the supplementary  
1124 materials. Additional data related to this paper may be requested from the corresponding author.  
1125

1126 **Figure Legends**

1127 **Fig. 1. SARS-CoV-2 SApNP vaccines induce broadly neutralizing plasma responses to three**  
1128 **variants of concern.** (A) Molecular surface representations of vaccine constructs, including two  
1129 spikes (S2P<sub>ECTO</sub>-5GS-1TD0 and S2G $\Delta$ HR2-5GS-1TD0) and three spike-presenting SApNPs  
1130 (S2G $\Delta$ HR2-5GS-ferritin (FR), S2G $\Delta$ HR2-5GS-E2p-LD4-PADRE (E2p-L4P), and S2G $\Delta$ HR2-  
1131 10GS-I3-01v9-LD7-PADRE (I3-01v9-L7P)). Representative negative-stain EM (nsEM) image of  
1132 S2G $\Delta$ HR2-10GS- I3-01v9-L7P SApNPs is shown on the right. (B) Neutralization of the original  
1133 Wuhan-Hu-1 strain by mouse plasma induced by five different vaccines at week 5 after two  
1134 intraperitoneal injections. ID<sub>50</sub> titers derived from SARS-CoV-2-pp neutralization assays are  
1135 plotted, with average ID<sub>50</sub> values labeled on the plots. (C) Mouse plasma neutralization against  
1136 the original Wuhan-Hu-1 strain and three variants, B.1.1.7, B1.351, and P.1, at week 5 after two  
1137 intraperitoneal injections of the adjuvanted S2G $\Delta$ HR2-10GS-I3-01v9-L7P vaccine. Left panels 1-  
1138 4: percent neutralization plots of individual mice against 4 SARS-CoV-2 strains; Right panel: ID<sub>50</sub>  
1139 plot. In (B) and (C), the plasma samples were generated in our previous study (47), in which mice  
1140 were immunized with 50  $\mu$ g of adjuvanted vaccine antigen. (D) Neutralization of the original  
1141 Wuhan-Hu-1 strain by mouse plasma induced the S2G $\Delta$ HR2 spike and two large S2G $\Delta$ HR2-  
1142 presenting SApNPs. Vaccines were administered via footpad injections (0.8  $\mu$ g/injection, for a  
1143 total of 3.3  $\mu$ g/mouse). (E) Mouse plasma neutralization against the original Wuhan-Hu-1 strain  
1144 and three variants, B.1.1.7, B1.351, and P.1, at week 5 after two footpad injections of the  
1145 S2G $\Delta$ HR2 spike and two large S2G $\Delta$ HR2-presenting SApNPs. In (B)-(E), the ID<sub>50</sub> values are  
1146 plotted as mean  $\pm$  SEM. The data were analyzed using two-tailed unpaired Student's *t*-test for  
1147 comparison between different vaccine groups or two-tailed paired Student's *t*-test for comparison  
1148 of ID<sub>50</sub> titers against SARS-Cov-2 variants using the same plasma samples from a mouse. \**p* <

1149 0.05, \*\* $p < 0.01$ . (F) Neutralization of four SARS-CoV-2 strains by human monoclonal antibodies  
1150 including CR3022, B38, CB6, S309, CC12.1, CC12.3, C105, and P2B-2F6. IC<sub>50</sub> values are listed  
1151 and color-coded (white: IC<sub>50</sub> > 10 µg/ml; green to red: low to high). The IC<sub>50</sub> values were  
1152 calculated with the % neutralization range constrained within 0.0-100.0%.

1153 **Fig. 2. Adjuvants enhance the I3-01v9 SApNP vaccine -induced plasma neutralization of both**  
1154 **the wildtype strain and three variants of concern.** (A) Schematic representation of mouse  
1155 immunization with the I3-01v9 SApNP with diverse adjuvant formulations and functional  
1156 assessment by SARS-CoV-2-pp neutralization assays and T-cell analysis. Conventional adjuvants,  
1157 STING/TLR agonists, macrophage inhibitors, and adjuvant combinations were compared to non-  
1158 adjuvanted control (PBS). (B, C) Mouse plasma neutralization against the wildtype SARS-CoV-2  
1159 strain, Wuhan-Hu-1, at weeks 5 and 8 after two and three footpad injections, respectively. ID<sub>50</sub>  
1160 titers derived from SARS-CoV-2-pp neutralization assays are plotted, with average ID<sub>50</sub> values  
1161 labeled on the plots. (D) Neutralization against three SARS-CoV-2 variants by mouse plasma from  
1162 STING (top panel) and CpG (bottom panel)-formulated vaccine groups. ID<sub>50</sub> titers derived from  
1163 SARS-CoV-2-pp neutralization assays are plotted. Splenic mononuclear cells derived from mice  
1164 in the STING and CpG groups ( $n=5$ /group) at week 8 were cultured in the presence of BALB/C  
1165 DCs pulsed with I3-01v9 SApNP ( $1 \times 10^{-7}$  mM). Cells were harvested 16 hours following re-  
1166 activation. (E) Production of IFN- $\gamma$ -producing Th1 CD4<sup>+</sup> T cells and IL-4-producing Th2 CD4<sup>+</sup> T  
1167 cells. (F) IFN- $\gamma$ -producing CD8<sup>+</sup> effector T cells. The  $P$  values were determined by one-way  
1168 ANOVA. \*,  $P < 0.05$ ; \*\*,  $P < 0.01$ ; \*\*\*,  $P < 0.001$ .

1169 **Fig. 3. Single-cell isolation identifies vaccine-elicited mouse neutralizing antibody lineages**  
1170 **with diverse breadth and potency.** (A) Genetic analysis of 20 mouse antibodies identified from

1171 M2 in the RBD-5GS-1TD0 trimer group (4), M4 in the S2GΔHR2-5GS-1TD0 spike group (6),  
1172 and M2 in the S2GΔHR2-10GS-I3-01v9-L7P SApNP group (10). Antibodies isolated by the RBD  
1173 and spike probes are highlighted in light gray and orange shade, respectively. **(B)** Neutralization  
1174 of four SARS-CoV-2 strains by 10 RBD and spike-elicited mouse antibodies (left) and 10 SApNP-  
1175 elicited mouse antibodies (right). IC<sub>50</sub> values are listed and color-coded (white: IC<sub>50</sub> > 100 μg/ml;  
1176 green to red: low to high). The IC<sub>50</sub> values were calculated with the %neutralization range  
1177 constrained within 0.0-100.0%. **(C)** EC<sub>50</sub> (μg/ml) values of 20 mouse antibodies binding to the  
1178 two SARS-CoV-2 antigens, the RBD monomer and S2GΔHR2-5GS-1TD0 spike, both with the  
1179 Wuhuan-Hu-1 backbone. Antigen binding was measured by ELISA in duplicates, with mean value  
1180 and standard deviation (SD) shown as black and red lines, respectively. **(D)** Divergence-identity  
1181 analysis of selected mouse NAbs in the context of RBD/spike-specific splenic B cells. HCs and  
1182 KCs are plotted as a function of sequence identity to the template and sequence divergence from  
1183 putative germline genes. Color coding denotes sequence density. The template and sequences  
1184 identified based on the V gene assignment and a CDR3 identity of 90%/85% or greater to the  
1185 template are shown as black and orange/magenta dots on the 2D plots, with the number of related  
1186 sequences labeled accordingly. The 2D plots for other NAbs are shown in fig. S4D-F.

1187 **Fig. 4. SARS-CoV-2 SApNP vaccines induce long-term lymph node follicle retention. (A, B)**  
1188 S2GΔHR2-presenting I3-01v9 SApNP vaccine distribution in a lymph node 12 h after **(A)** a single-  
1189 dose or **(B)** prime-boost footpad injections (10 μg/injection, 40 μg/mouse). A schematic illustration  
1190 of SApNPs in lymph node follicles is shown. **(C, D)** Histological images of the S2GΔHR2 spike  
1191 and S2GΔHR2-presenting E2p and I3-01 SApNP vaccine trafficking and retention in lymph node  
1192 follicles 2 h to 8 weeks after **(C)** a single-dose or **(D)** prime-boost injections, with a scale bar of

1193 50  $\mu\text{m}$  shown for each image. **(E, F)** Quantification of vaccine accumulation in lymph node  
1194 follicles 48 h after **(E)** a single-dose or **(F)** prime-boost injections. Data were collected from more  
1195 than 10 lymph node follicles ( $n = 3\text{-}4$  mice/group). The data points are expressed as mean  $\pm$  SD.  
1196 The data were analyzed using one-way ANOVA followed by Tukey's multiple comparison *post*  
1197 *hoc* test. \*\* $p < 0.01$ , \*\*\* $p < 0.001$ , \*\*\*\* $p < 0.0001$ .

1198 **Fig. 5. SARS-CoV-2 SApNP vaccines interact with follicular dendritic cells (FDCs) and are**  
1199 **presented on FDC dendrites to B cells. (A, B)** S2G $\Delta$ HR2 spike and S2G $\Delta$ HR2-presenting E2p  
1200 and I3-01 SApNP vaccine interaction with FDC networks in lymph node follicles 12 h after **(A)** a  
1201 single-dose or **(B)** prime-boost injections (10  $\mu\text{g}/\text{injection}$ , 40  $\mu\text{g}/\text{mouse}$ ). Vaccine antigens (the  
1202 S2G $\Delta$ HR2 spike and S2G $\Delta$ HR2-presenting E2p and I3-01 SApNPs) colocalized with FDC  
1203 networks. Immunostaining is color-coded (Green: CD21; Red: CD169; White: anti-spike), with  
1204 scale bars of 500  $\mu\text{m}$  and 100  $\mu\text{m}$  shown for a complete lymph node and an enlarged image of a  
1205 follicle, respectively. **(C)** Representative TEM images of an FDC surrounded by multiple B cells.  
1206 S2G $\Delta$ HR2-presenting I3-01 SApNPs (yellow arrows) presented on FDC dendrites.

1207 **Fig. 6. SARS-CoV-2 SApNP vaccines induce robust long-lived germinal centers. (A)** Top:  
1208 Representative immunohistological images of germinal centers at week 2 after a single-dose  
1209 injection of the S2G $\Delta$ HR2-presenting I3-01 SApNP vaccine (10  $\mu\text{g}/\text{injection}$ , 40  $\mu\text{g}/\text{mouse}$ ).  
1210 Bottom: germinal center B cells (GL7<sup>+</sup>, red) adjacent to FDCs (CD21<sup>+</sup>, green) in lymph node  
1211 follicles (left) and T<sub>fh</sub> cells in the light zone (LZ) of germinal centers (right). Scale bars of 500  $\mu\text{m}$   
1212 and 50  $\mu\text{m}$  are shown for a complete lymph node and an enlarged image of a follicle, respectively.  
1213 **(B, C)** Quantification of germinal center reactions using immunofluorescent images: GC/FDC  
1214 ratio and sizes of germinal centers 2, 5, and 8 weeks after **(B)** a single-dose or **(C)** prime-boost



1215 injections ( $n = 4-7$  mice/group). The GC/FDC ratio is defined as whether germinal center  
1216 formation is associated with an FDC network (%). Representative immunohistological images of  
1217 germinal centers in mice immunized using S2G $\Delta$ HR2 spike or S2G $\Delta$ HR2-presenting E2p and I3-  
1218 01 SApNP vaccines at week 8 after **(D)** a single-dose or **(E)** prime-boost injections, with a scale  
1219 bar of 50  $\mu\text{m}$  shown for each image. **(F, G)** Quantification of germinal center reactions using flow  
1220 cytometry: percentage and number of germinal center B cells and T<sub>fh</sub> cells 2, 5, and 8 weeks after  
1221 **(F)** a single-dose or **(G)** prime-boost injections. The data points are shown as mean  $\pm$  SD. The data  
1222 were analyzed using one-way ANOVA followed by Tukey's multiple comparison *post hoc* test for  
1223 each timepoint. \* $p < 0.05$ , \*\* $p < 0.01$ , \*\*\* $p < 0.001$ , \*\*\*\* $p < 0.0001$ .

# Figure 1

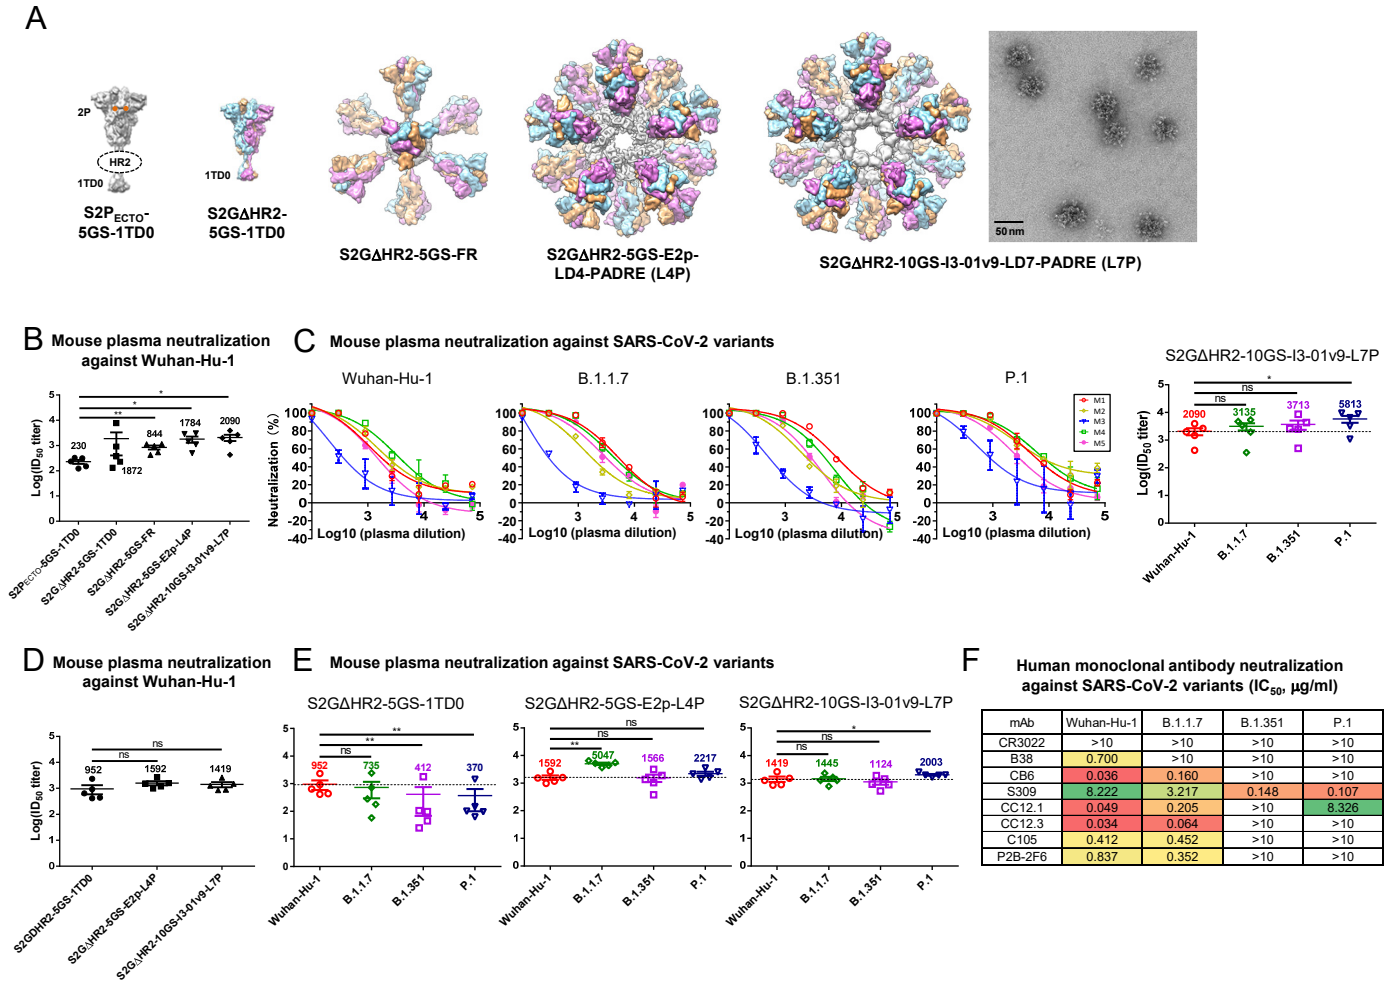

## Figure 2

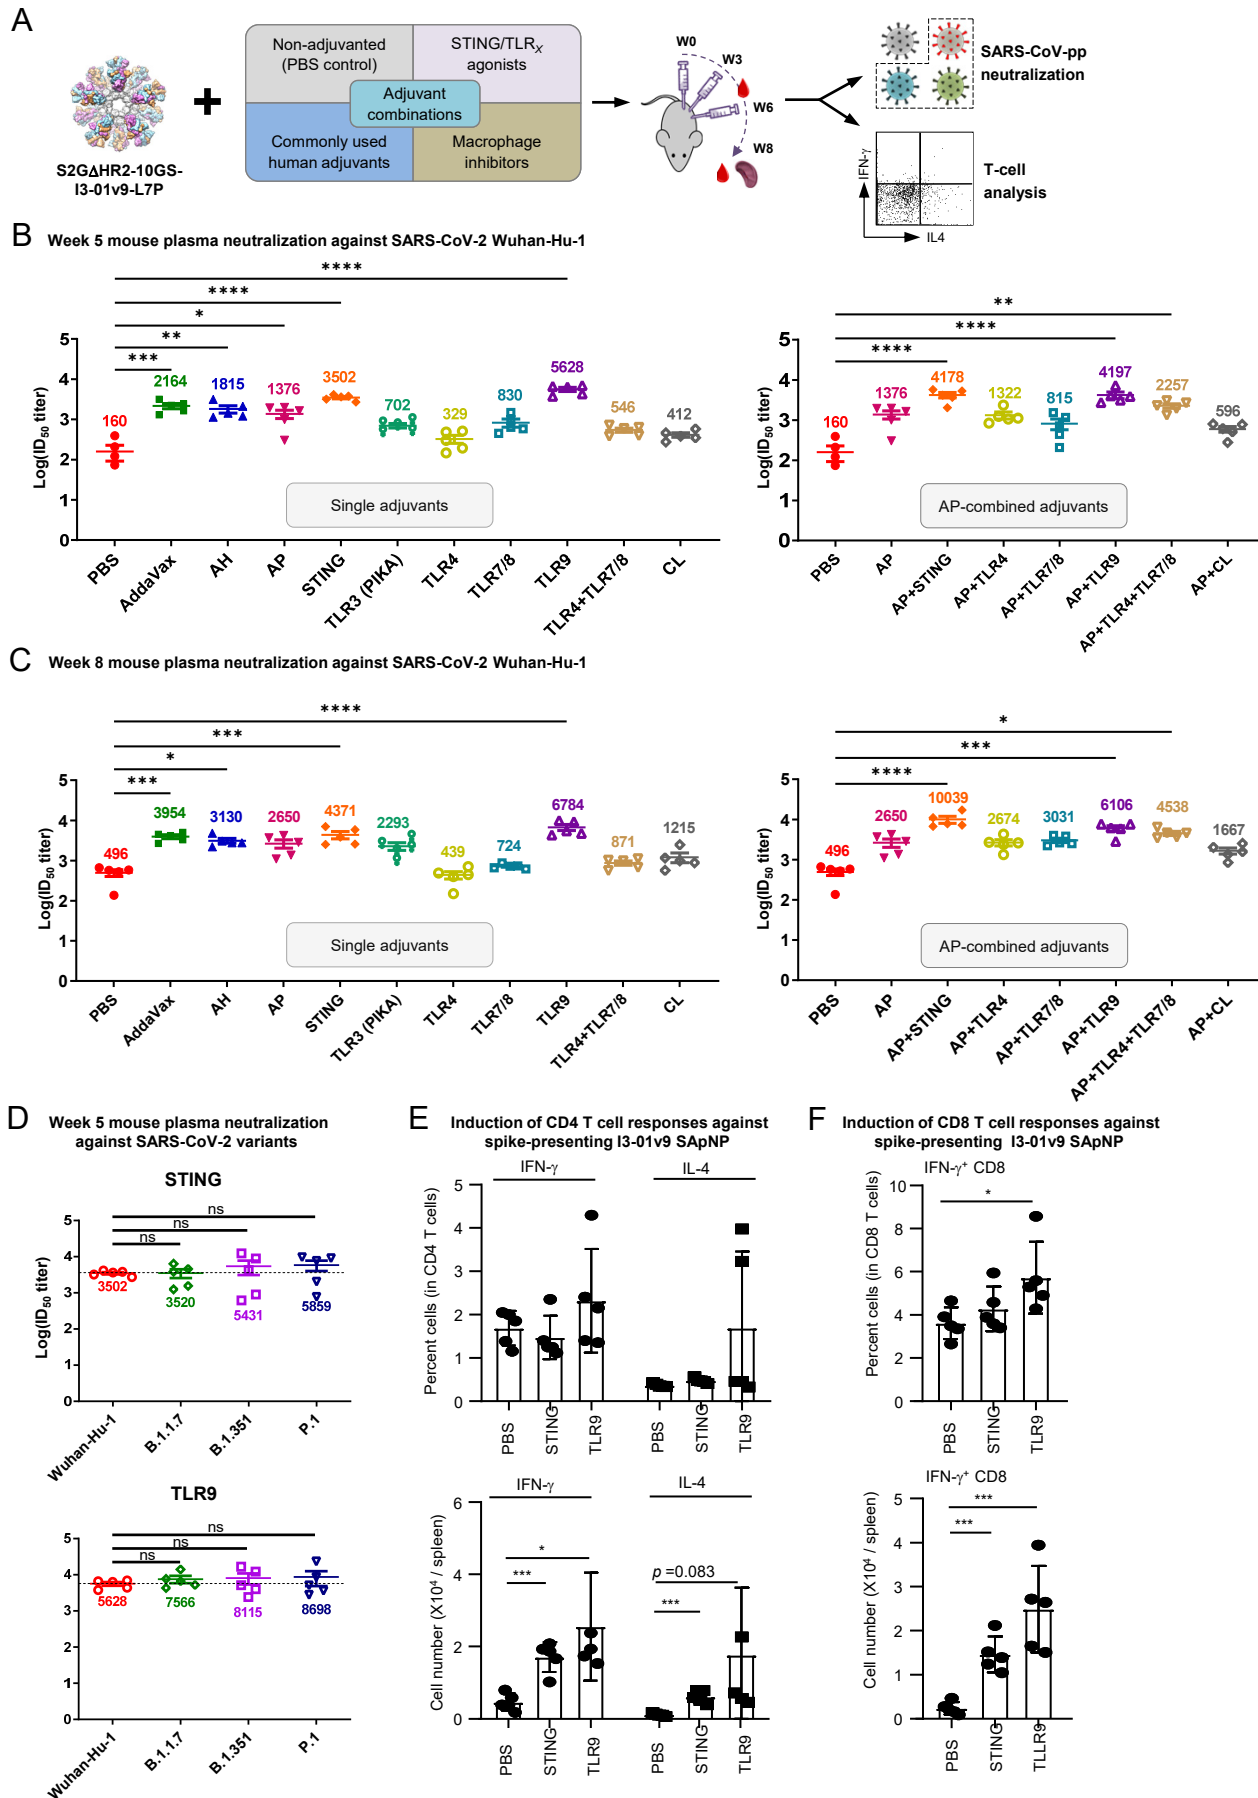

## Figure 3

**A Antibodies identified from SARS-CoV-2 RBD, spike, and nanoparticle-immunized mice by single-cell sorting<sup>a</sup>**

| Antibody    | V <sub>H</sub> family <sup>b</sup> | V <sub>H</sub> identity <sup>b</sup> | HCDR3 (# aa) <sup>c</sup> | V <sub>K</sub> family <sup>b</sup> | V <sub>K</sub> identity <sup>b</sup> | KCDR3 (# aa) <sup>c</sup> |
|-------------|------------------------------------|--------------------------------------|---------------------------|------------------------------------|--------------------------------------|---------------------------|
| TRBD-R-4B6  | IGHV2-2*02                         | 97.6%                                | WGYWYFDV (8)              | IGKV8-24*01                        | 98.0%                                | QQHYSTPLT (9)             |
| TRBD-R-4F3  | IGHV1-12*01                        | 95.6%                                | DDYYALDY (8)              | IGKV8-30*01                        | 97.0%                                | QQYYSYPWT (9)             |
| TRBD-R-4G5  | IGHV1-5*01                         | 94.9%                                | DDYGYGNY (8)              | IGKV12-44*01                       | 99.6%                                | QHHYGTPLT (9)             |
| TRBD-R-5B9  | IGHV1S126*01                       | 88.0%                                | RDYYGNPFDV (11)           | IGKV2-137*01                       | 97.7%                                | MQHLEYPYT (9)             |
| S2GD-S-1F3  | IGHV1-7*01                         | 95.9%                                | SEYGNLYYAMDY (12)         | IGKV3-4*01                         | 97.6%                                | QQSNDEPLT (9)             |
| S2GD-S-2C10 | IGHV1-14*01                        | 98.6%                                | FTKVEGY (7)               | IGKV3-2*01                         | 97.3%                                | HQSKVEPWT (9)             |
| S2GD-R-1F9  | IGHV14-1*02                        | 98.6%                                | WEGRAMDY (8)              | IGKV10-94*01                       | 95.8%                                | QQYSSPYT (9)              |
| S2GD-R-2D10 | IGHV14-3*02                        | 95.1%                                | WDNAAYYGMVDY (12)         | IGKV14-111*01                      | 95.7%                                | LQYDELYT (8)              |
| S2GD-R-2E4  | IGHV1S81*02                        | 92.8%                                | YGRYFDC (7)               | IGKV14-130*01                      | 98.2%                                | LQYEFYPY (9)              |
| S2GD-R-2F4  | IGHV1-37*01                        | 95.8%                                | ERHY (4)                  | IGKV14-100*01                      | 98.9%                                | VQYDQFPYT (9)             |
| I3V9-S-1C9  | IGHV14-1*02                        | 98.6%                                | GDFDY (5)                 | IGKV4-55*01                        | 96.1%                                | QQWGTYPPT (10)            |
| I3V9-S-2D8  | IGHV1-18*01                        | 95.6%                                | GLYDYDGSFPAY (12)         | IGKV10-96*01                       | 96.8%                                | QQGNTLPYT (9)             |
| I3V9-S-2D10 | IGHV14-1*02                        | 95.5%                                | GDGNY (5)                 | IGKV4-57*01                        | 97.8%                                | QQRSSYPIFT (10)           |
| I3V9-R-1G3  | IGHV1S81*02                        | 94.2%                                | DGSSAY (6)                | IGKV9-120*01                       | 97.1%                                | LQYAGSPFT (9)             |
| I3V9-R-1G9  | IGHV1-18*01                        | 93.2%                                | DGYPIYYAMDY (11)          | IGKV6-15*01                        | 97.9%                                | QQYNSYPWT (9)             |
| I3V9-R-1F5  | IGHV1-82*01                        | 92.5%                                | SWDGLVFAV (9)             | IGKV4-55*01                        | 93.3%                                | QQWNNFPPT (9)             |
| I3V9-R-2E11 | IGHV1S81*02                        | 92.2%                                | DGSIAY (6)                | IGKV9-120*01                       | 98.5%                                | LQYASSPYT (9)             |
| I3V9-R-2F2  | IGHV1-18*01                        | 89.4%                                | DRYDRYFDV (9)             | IGKV4-55*01                        | 92.9%                                | QQWNNFPPT (9)             |
| I3V9-R-2F5  | IGHV1-20*02                        | 96.2%                                | SHDYRFDY (8)              | IGKV9-123*01                       | 97.5%                                | LQRNAYPT (9)              |
| I3V9-R-2F10 | IGHV1-18*01                        | 92.9%                                | DGYPIYYALDY (11)          | IGKV12-98*01                       | 97.6%                                | QLLYSTPLT (9)             |

<sup>a</sup> Splenic B cells from three mice immunized with the RBD-5GS-1TD0 trimer, S2GΔHR2-5GS-1TD0 spike, and S2GΔHR2-10GS-I3-01v9-L7P NP were sorted to isolate monoclonal neutralizing antibodies. Antibodies are named as [vaccine]-[probe]-[sorting index]. [vaccine]: TRBD, S2GD, and I3V9 stand for RBD-5GS-1TD0, S2GΔHR2-5GS-1TD0, and S2GΔHR2-10GS-I3-01v9-L7P, respectively. [probe]: R and S stand for RBD-5GS-foldon-Avi-Biot and S2GΔHR2-5GS-foldon-Avi-Biot, respectively. Spike and RBD-sorted antibodies are highlighted in light gray and light brown shade, respectively.

<sup>b</sup> V<sub>H/K</sub> gene assignment and identity were determined by IGBLAST (<https://www.ncbi.nlm.nih.gov/igblast/>).

<sup>c</sup> H/KCDR3 sequence and length are determined following the Kabat numbering scheme.

**B RBD and spike-elicited mouse neutralizing antibodies against SARS-CoV-2 wildtype and variants (IC<sub>50</sub>, μg/ml)**

| Antibody    | Wuhan-Hu-1 | B.1.1.7 | B.1.351 | P.1   |
|-------------|------------|---------|---------|-------|
| TRBD-R-4B6  | 0.109      | 0.053   | >100    | >100  |
| TRBD-R-4F3  | 4.074      | 6.217   | 0.126   | 0.085 |
| TRBD-R-4G5  | 0.019      | 0.031   | 1.157   | 0.823 |
| TRBD-R-5B9  | 1.003      | 2.529   | 1.447   | 0.693 |
| S2GD-S-1F3  | 0.273      | 24.130  | >100    | >100  |
| S2GD-S-2C10 | 0.030      | 0.020   | 0.906   | 1.175 |
| S2GD-R-1F9  | 1.199      | 0.941   | 4.015   | 2.719 |
| S2GD-R-2D10 | 16.970     | 3.622   | 14.430  | 1.502 |
| S2GD-R-2E4  | 2.598      | 1.868   | 0.236   | 0.162 |
| S2GD-R-2F4  | 1.921      | 1.132   | 3.673   | 3.867 |

**Spike nanoparticle-elicited mouse neutralizing antibodies against SARS-CoV-2 wildtype and variants (IC<sub>50</sub>, μg/ml)**

| Antibody    | Wuhan-Hu-1 | B.1.1.7 | B.1.351 | P.1    |
|-------------|------------|---------|---------|--------|
| I3V9-S-1C9  | 0.120      | 0.089   | 0.053   | 0.074  |
| I3V9-S-2D8  | >100       | 2.634   | 11.820  | 6.471  |
| I3V9-S-2D10 | 0.095      | 0.051   | 0.102   | 0.181  |
| I3V9-R-1F5  | 9.291      | 3.083   | 6.241   | 3.101  |
| I3V9-R-1G3  | 0.027      | 0.026   | 10.430  | 9.309  |
| I3V9-R-1G9  | 0.024      | 0.008   | 0.012   | 0.007  |
| I3V9-R-2E11 | 0.152      | 0.052   | >100    | >100   |
| I3V9-R-2F2  | 3.598      | 14.350  | 3.167   | 1.583  |
| I3V9-R-2F5  | 2.582      | 3.659   | 3.759   | 8.757  |
| I3V9-R-2F10 | 54.520     | >100    | 14.100  | 11.740 |

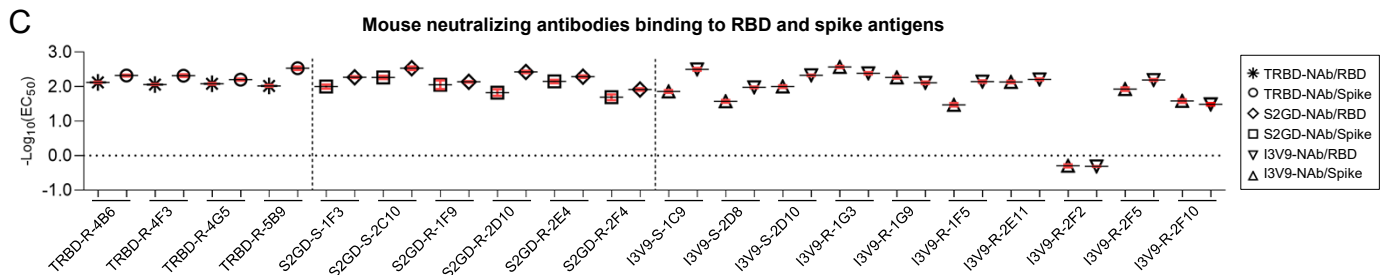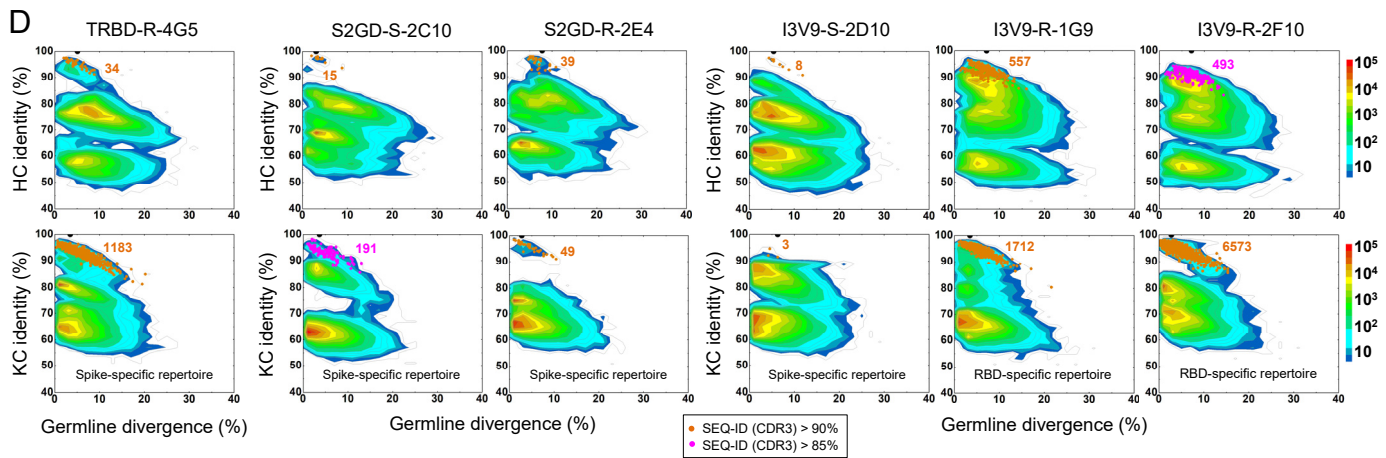

## Figure 4

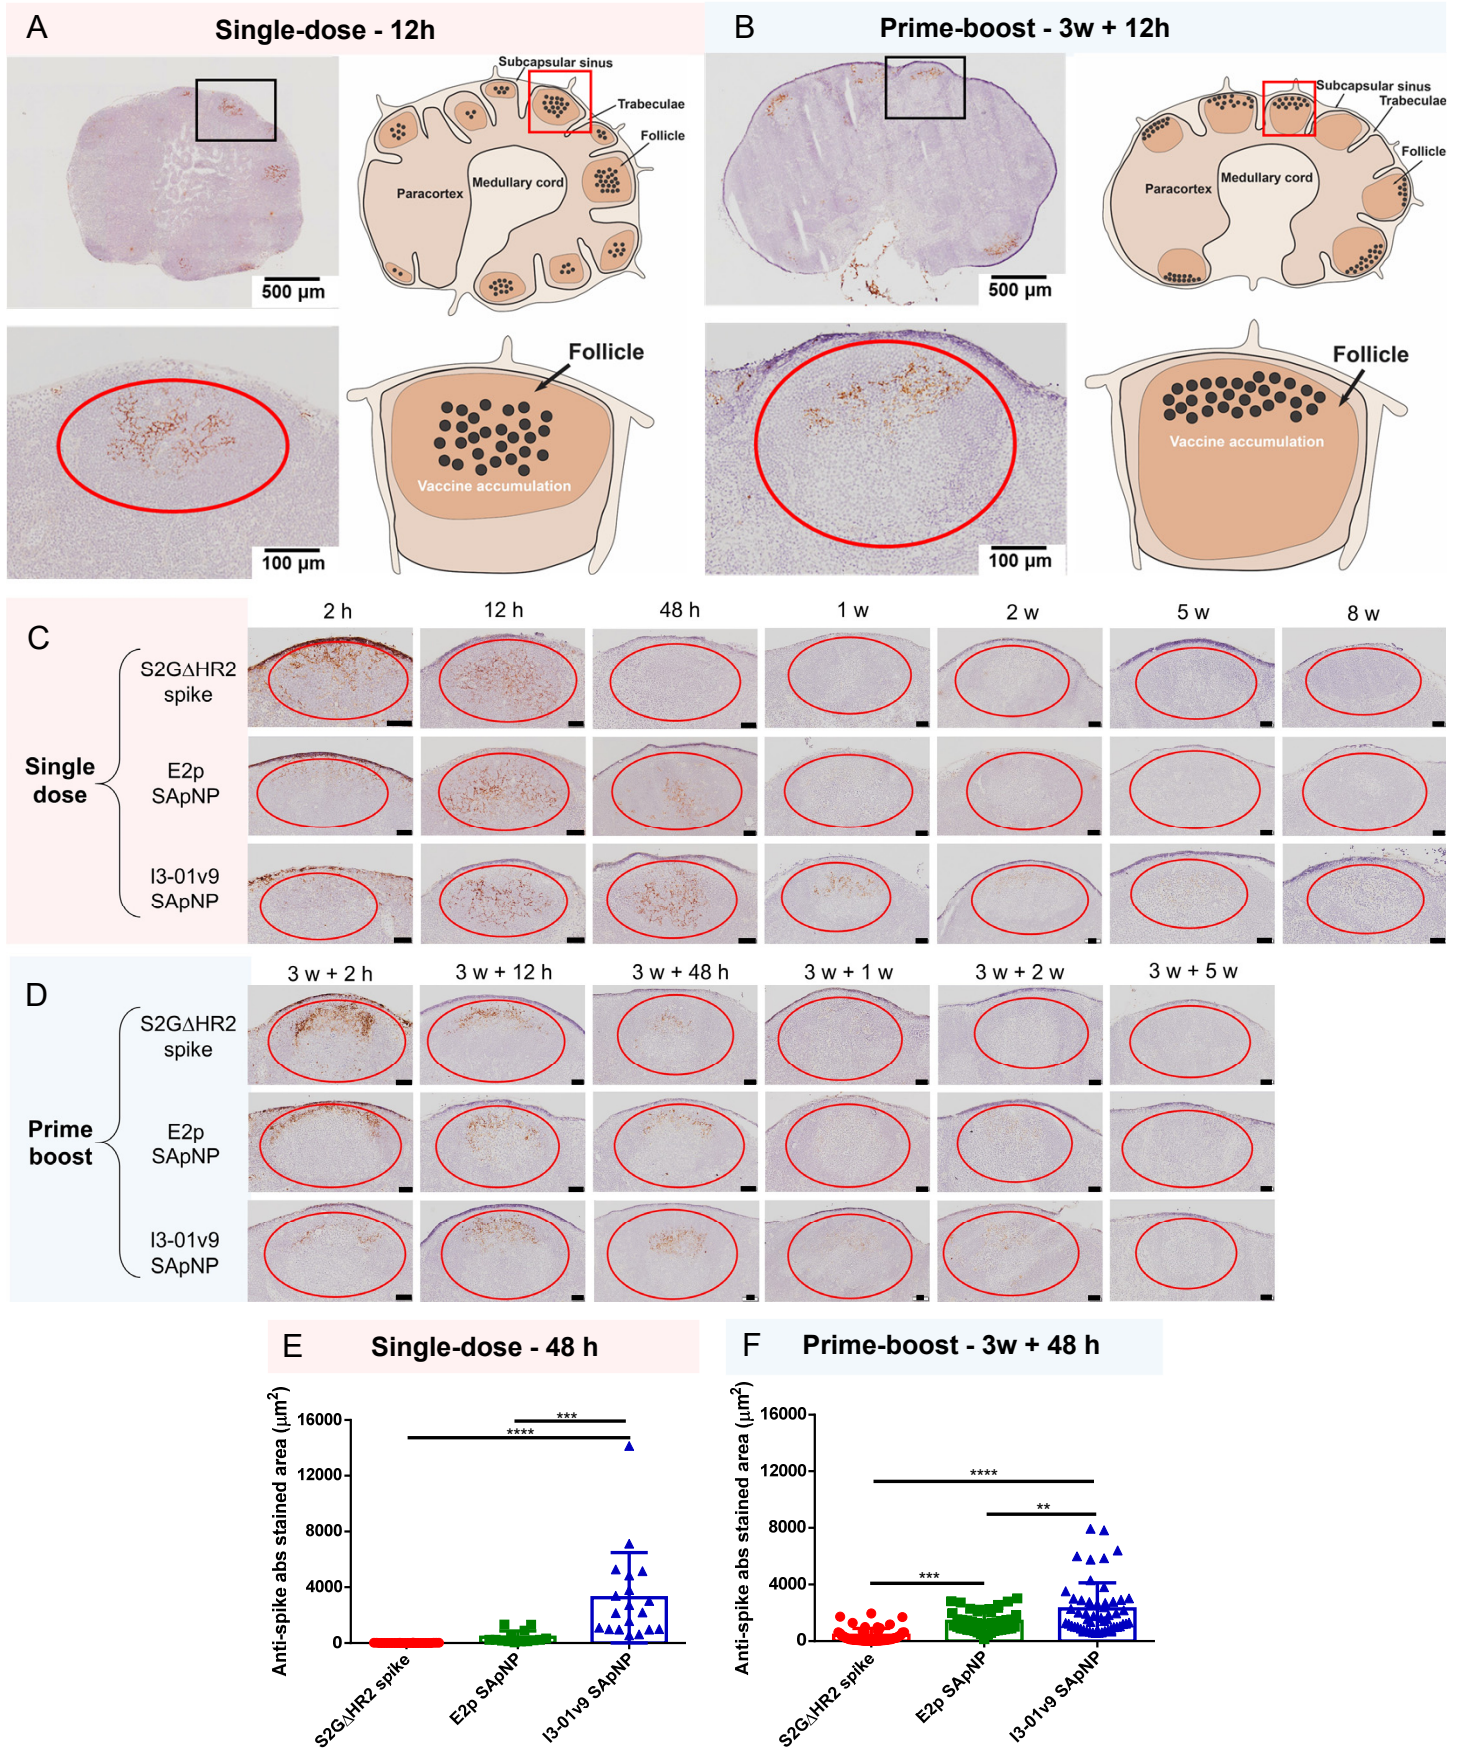

## Figure 5

### A Single-dose - 12h

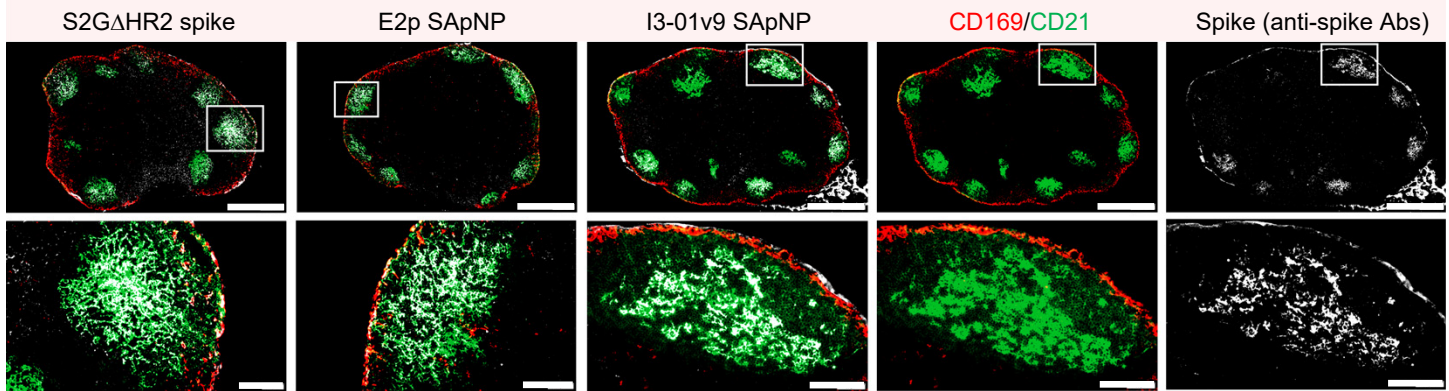

### B Prime-boost - 3w + 12h

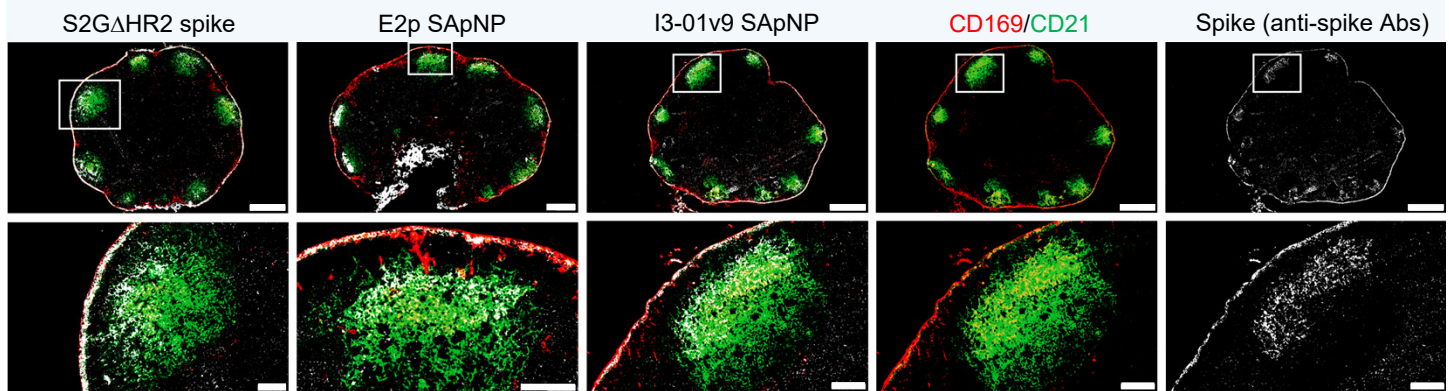

### C I3-01v9 SApNPs (yellow arrow) are aligned on FDC dendrites

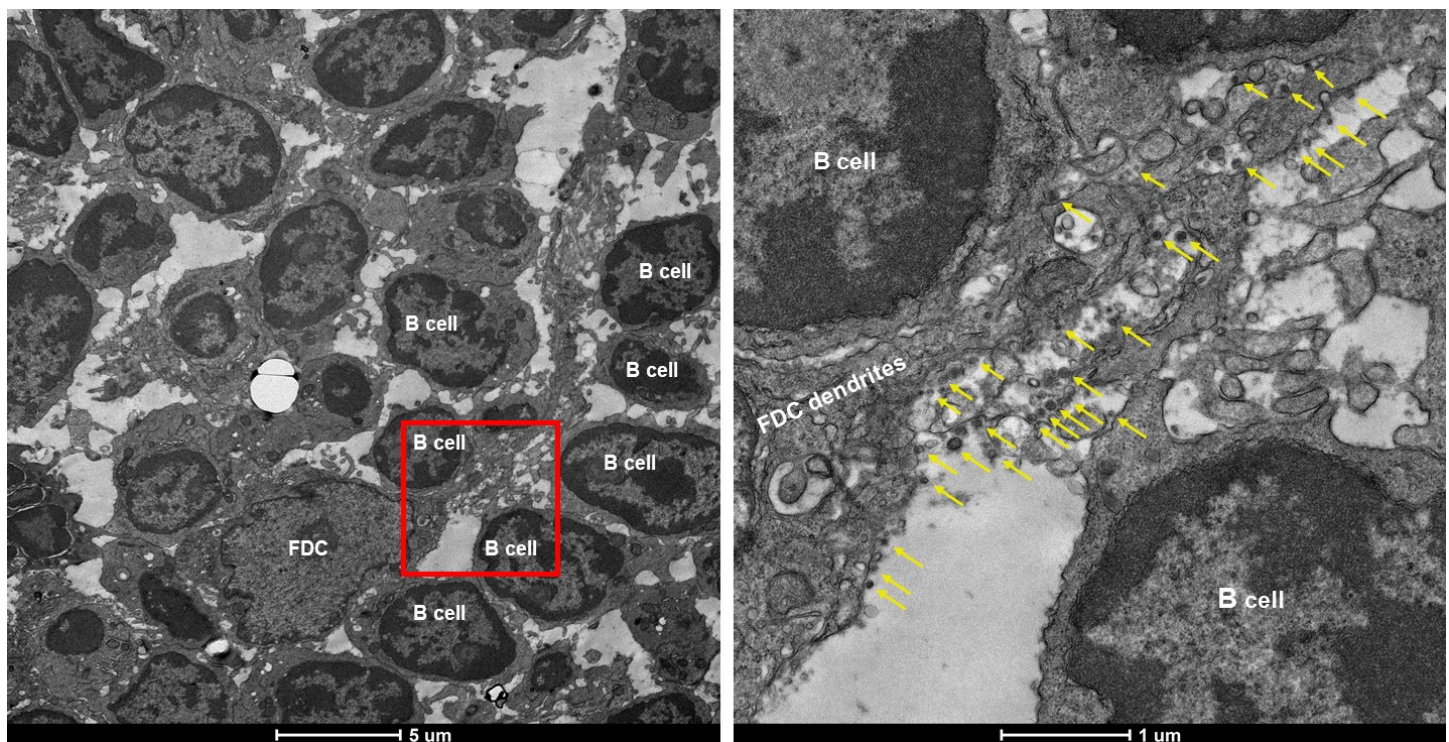

## Figure 6

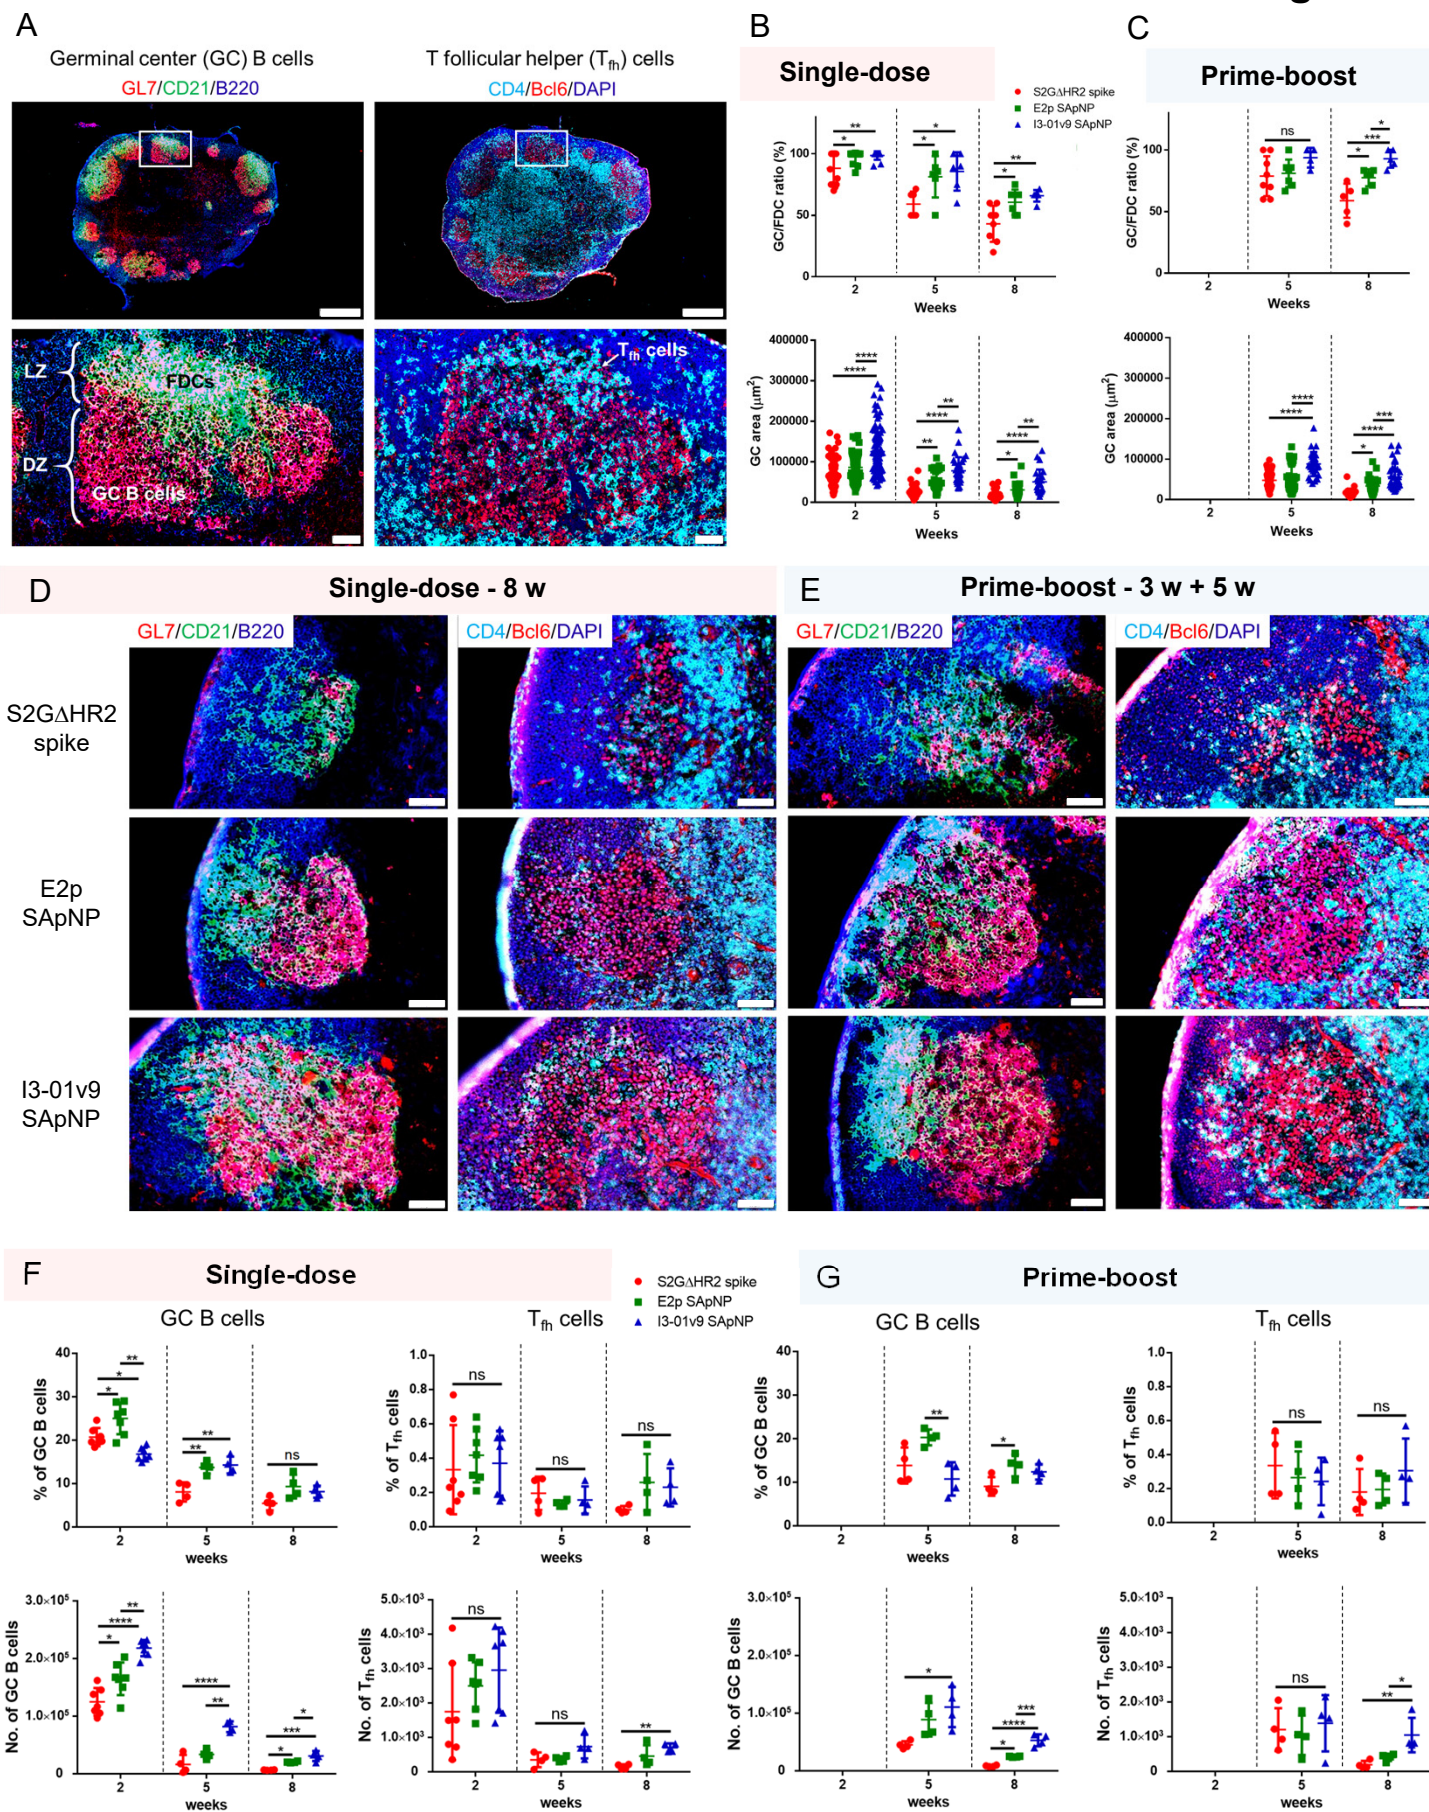

Source: http://biorxiv.org/content/10.1101/2021.03.26.437274v2.full.pdf
