# Supplementary material for: Mechanism of a COVID-19 nanoparticle vaccine candidate that elicits a broadly neutralizing antibody response to SARS-CoV-2 variants
Source: PubMed Central journal article supplement — bioRxiv. 2021 Sep 9:2021.03.26.437274. Originally published 2021 Mar 27. Preprint. [Version 4] doi: 10.1101/2021.03.26.437274 (PMC8010731; doi:10.1101/2021.03.26.437274), 2021-09-09
Supplement: media-1.pdf [file media-1.pdf]

# Supplementary Materials for

## **Mechanism of a COVID-19 nanoparticle vaccine candidate that elicits a broadly neutralizing antibody response to SARS-CoV-2 variants**

Yi-Nan Zhang<sup>1</sup>, Jennifer Paynter<sup>1</sup>, Tatiana Fourfouris<sup>1</sup>, Cindy Sou<sup>1</sup>, Timothy Ngo<sup>1</sup>,

Linling He<sup>1</sup>, and Jiang Zhu<sup>1, 2, \*</sup>

Correspondence to: JZ ([jiang@scripps.edu](mailto:jiang@scripps.edu));

**This PDF file includes:**

Figs. S1 to S6

**A** Mouse plasma neutralization against SARS-CoV-2 strains Wuhan-Hu-1, B.1.1.7, B.1.351, and P.1

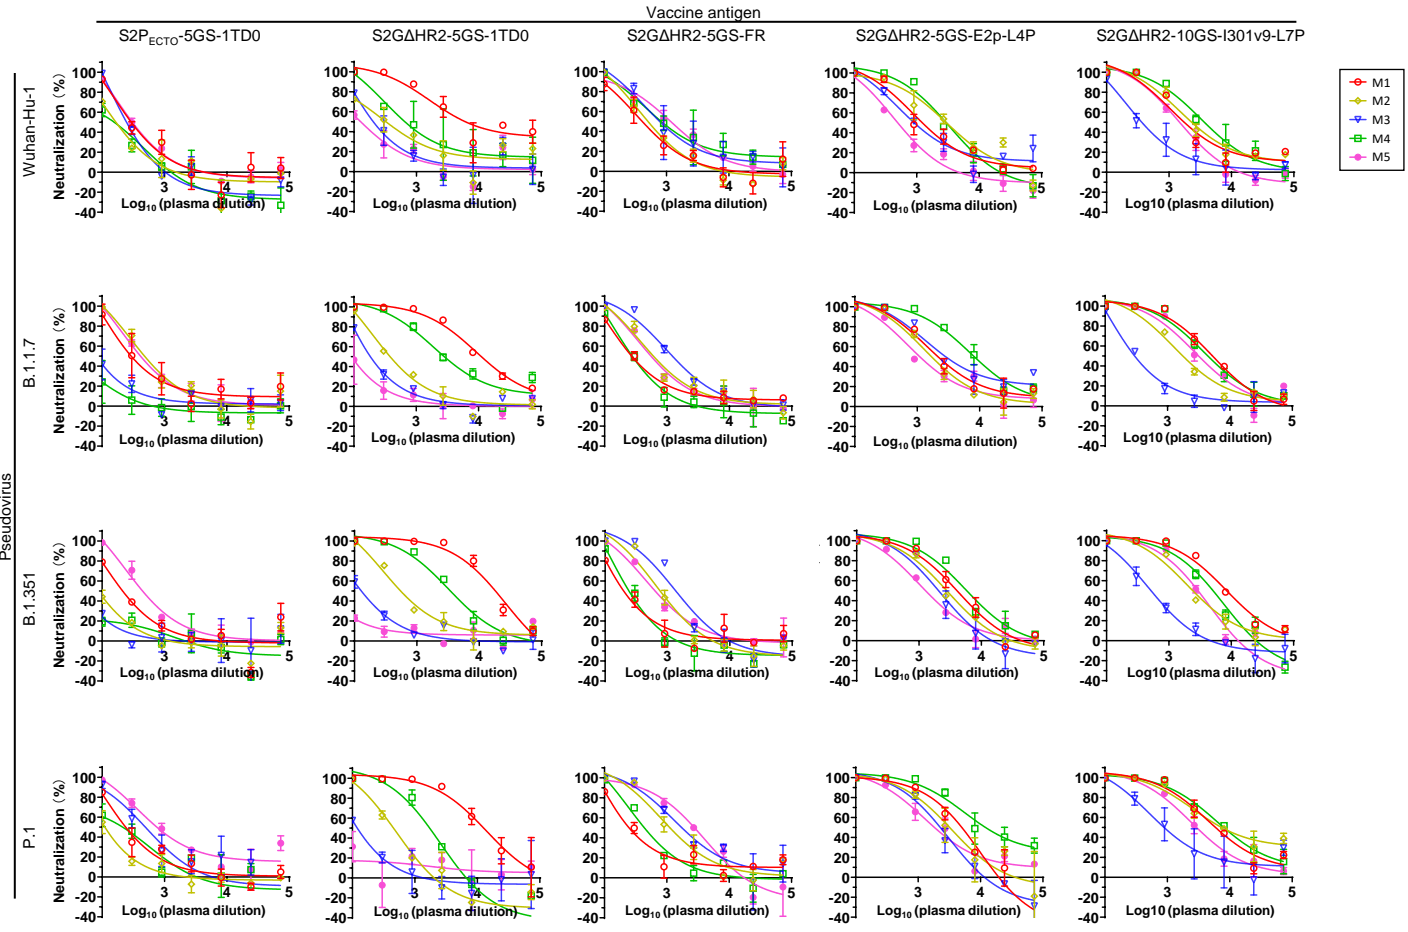

**B** Mouse plasma neutralization ID<sub>50</sub> titers

| Vaccine antigen                             | Wuhan-Hu-1 |      |      |      |      | B.1.1.7 |      |      |      |      | B.1.351 |      |      |      |      | P.1   |      |      |       |      |
|---------------------------------------------|------------|------|------|------|------|---------|------|------|------|------|---------|------|------|------|------|-------|------|------|-------|------|
|                                             | M1         | M2   | M3   | M4   | M5   | M1      | M2   | M3   | M4   | M5   | M1      | M2   | M3   | M4   | M5   | M1    | M2   | M3   | M4    | M5   |
| S2P <sub>ECTO</sub> -5GS-1TD0 (50 µg, i.p.) | 316        | 150  | 233  | 123  | 326  | 377     | 541  | <100 | <100 | 487  | 223     | <100 | <100 | <100 | 506  | 274   | <100 | 465  | 186   | 967  |
| S2ΔHR2-5GS-1TD0 (50 µg, i.p.)               | 7719       | 370  | 227  | 911  | 131  | 11868   | 444  | 202  | 3252 | <100 | 17560   | 654  | 123  | 3550 | <100 | 12563 | 387  | 101  | 1467  | <100 |
| S2ΔHR2-5GS-FR (50 µg, i.p.)                 | 425        | 544  | 962  | 1135 | 1154 | 326     | 700  | 1327 | 293  | 629  | 215     | 764  | 1353 | 236  | 695  | 316   | 1244 | 1978 | 488   | 2355 |
| S2ΔHR2-5GS-E2p-L4P (50 µg, i.p.)            | 1442       | 3020 | 1107 | 2849 | 501  | 2458    | 1846 | 3473 | 8633 | 1331 | 4018    | 2757 | 2002 | 5971 | 1375 | 3650  | 3085 | 1966 | 14185 | 2104 |
| S2ΔHR2-10GS-I301v9-L7P (50 µg, i.p.)        | 1992       | 2648 | 428  | 3910 | 1470 | 5313    | 1953 | 355  | 4715 | 3337 | 8641    | 2602 | 506  | 4336 | 2480 | 6461  | 9520 | 1070 | 8834  | 3180 |

**C** Mouse plasma neutralization against SARS-CoV-2 strains Wuhan-Hu-1, B.1.1.7, B1.351, and P.1

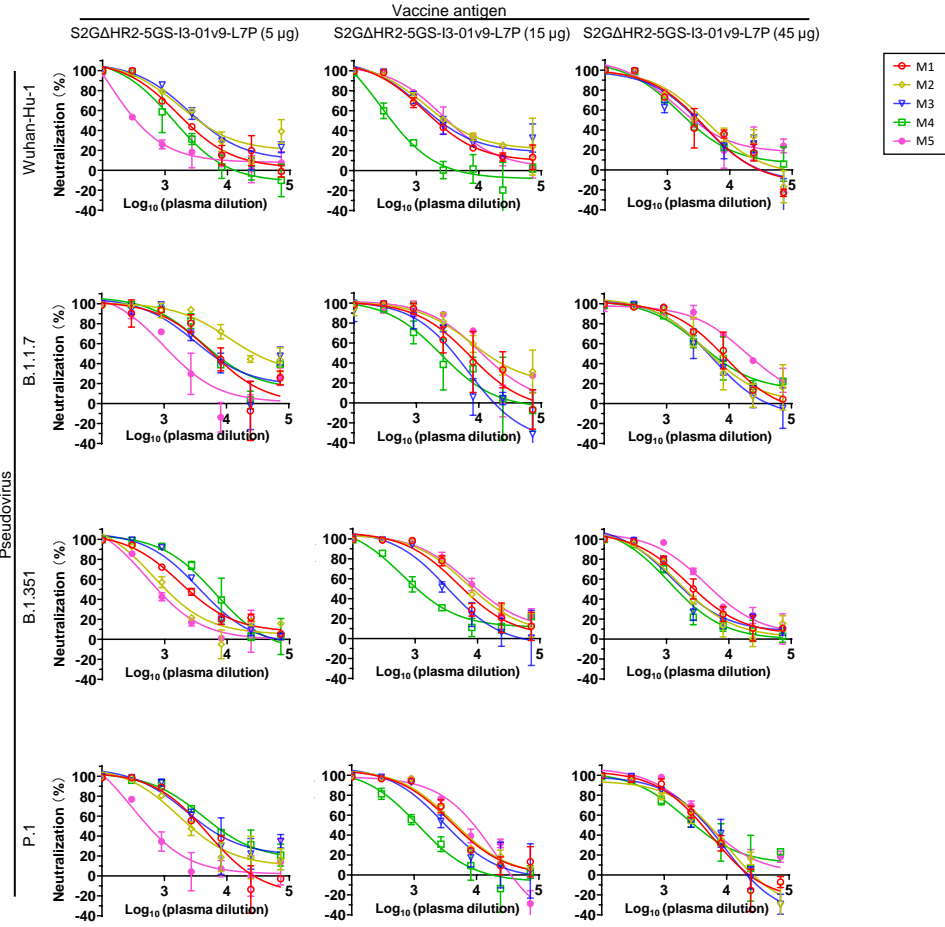

**D** Mouse plasma neutralization ID<sub>50</sub> titers

| Vaccine antigen                        | Wuhan-Hu-1 |      |      |      |      | B.1.1.7 |       |      |      |       | B.1.351 |      |      |      |       | P.1  |      |      |      |      |
|----------------------------------------|------------|------|------|------|------|---------|-------|------|------|-------|---------|------|------|------|-------|------|------|------|------|------|
|                                        | M1         | M2   | M3   | M4   | M5   | M1      | M2    | M3   | M4   | M5    | M1      | M2   | M3   | M4   | M5    | M1   | M2   | M3   | M4   | M5   |
| S2GΔHR2-10GS-I3-01v9-L7P (5 µg, i.p.)  | 2287       | 4102 | 4023 | 1364 | 455  | 6142    | 28391 | 6058 | 7113 | 1393  | 2624    | 1163 | 3711 | 5420 | 848   | 3550 | 2939 | 5351 | 7806 | 620  |
| S2GΔHR2-10GS-I3-01v9-L7P (15 µg, i.p.) | 2381       | 3946 | 2911 | 425  | 3493 | 6246    | 13941 | 3284 | 2315 | 11227 | 6220    | 8930 | 3425 | 1290 | 10607 | 4560 | 5007 | 3325 | 1143 | 6478 |
| S2GΔHR2-10GS-I3-01v9-L7P (45 µg, i.p.) | 2772       | 3753 | 2644 | 2433 | 3186 | 7277    | 5160  | 4435 | 6032 | 19255 | 3062    | 2141 | 2119 | 1538 | 5770  | 3627 | 3585 | 3469 | 3503 | 5235 |

**E** Mouse plasma neutralization against SARS-CoV-2 strains Wuhan-Hu-1, B.1.1.7, B1.351, and P.1

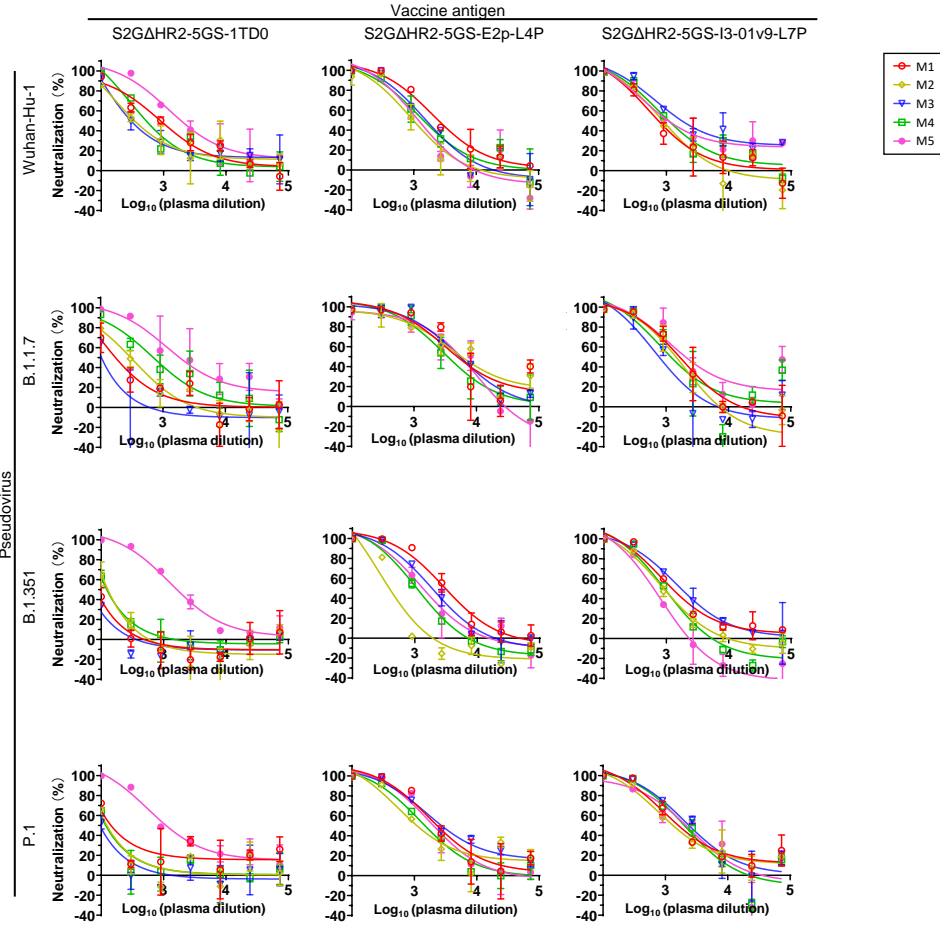

**F** Mouse plasma neutralization ID<sub>50</sub> titers

| Vaccine antigen                         | Wuhan-Hu-1 |     |      |      |      | B.1.1.7 |      |      |      |      | B.1.351 |      |      |      |      | P.1  |      |      |      |      |
|-----------------------------------------|------------|-----|------|------|------|---------|------|------|------|------|---------|------|------|------|------|------|------|------|------|------|
|                                         | M1         | M2  | M3   | M4   | M5   | M1      | M2   | M3   | M4   | M5   | M1      | M2   | M3   | M4   | M5   | M1   | M2   | M3   | M4   | M5   |
| S2GΔHR2-5GS-1TD0 (3.3 μg, i.d.)         | 923        | 435 | 416  | 640  | 2345 | 179     | 278  | <100 | 721  | 2440 | <100    | <100 | <100 | 105  | 1787 | 146  | 100  | <100 | <100 | 1446 |
| S2GΔHR2-5GS-E2p-L4P (3.3 μg, i.d.)      | 2680       | 988 | 1586 | 1530 | 1178 | 5243    | 6549 | 5467 | 3676 | 4300 | 3149    | 377  | 1884 | 1048 | 1372 | 2533 | 1335 | 3524 | 1573 | 2120 |
| S2GΔHR2-10GS-I3-01v9-L7P (3.3 μg, i.d.) | 851        | 884 | 2593 | 1263 | 1504 | 1617    | 1271 | 776  | 1267 | 2292 | 1418    | 921  | 1866 | 891  | 522  | 1923 | 1616 | 2530 | 1980 | 1968 |

**G** Human monoclonal antibody neutralization against SARS-CoV-2 strains Wuhan-Hu-1, B.1.1.7, B1.351, and P.1

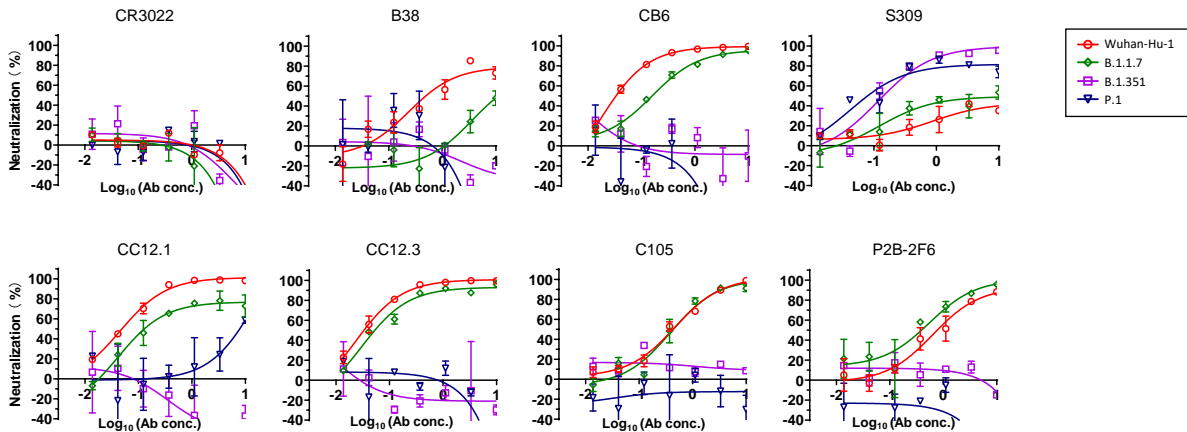

**H** Mouse plasma neutralization against MLV-pp

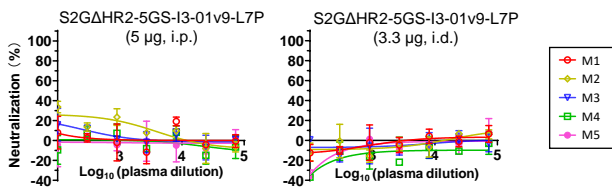

**I** Mouse plasma neutralization ID<sub>50</sub> titers

| Vaccine antigen                         | MLV-pp |      |      |      |      |
|-----------------------------------------|--------|------|------|------|------|
|                                         | M1     | M2   | M3   | M4   | M5   |
| S2GΔHR2-10GS-I3-01v9-L7P (5 μg, i.p.)   | <100   | <100 | <100 | <100 | <100 |
| S2GΔHR2-10GS-I3-01v9-L7P (3.3 μg, i.d.) | <100   | <100 | <100 | <100 | <100 |

**fig. S1. Spike and spike-presenting SApNP vaccine-induced neutralizing antibody responses against SARS-CoV-2 variants of concern (VOCs).** (A) Neutralization curves of mouse plasma from 5 vaccine groups at week 5 after 2 intraperitoneal (i.p.) injections. The plasma samples were generated in the previous study (Ref 41), where mice were immunized with 50 μg of adjuvanted vaccine antigen. The five vaccines include two spikes (S2P<sub>ECTO</sub>-5GS-1TD0 and S2GΔHR2-5GS-1TD0) and three SApNPs (S2GΔHR2-5GS-FR, S2GΔHR2-5GS-E2p-LD4-PADRE (L4P), and S2GΔHR2-10GS-I3-01v9-LD7-PADRE (L7P)). (B) Summary of ID<sub>50</sub> titers measured for five SARS-CoV-2 spike-based vaccine groups in (A). (C) Neutralization curves of mouse plasma induced by the S2GΔHR2-presenting I3-01v9 SApNP vaccine at week 5 after two i.p. injections with different antigen doses (5 μg, 15 μg, and 45 μg). (D) Summary of ID<sub>50</sub> titers measured for the S2GΔHR2-presenting I3-01v9 SApNP vaccine in (C). (E) Neutralization curves of mouse plasma induced by the S2GΔHR2 spike and two S2GΔHR2-presenting SApNPs (E2p and I3-01v9) at week 5 after two intradermal (i.d.) footpad injections (0.8 μg per injection, totally 3.3 μg per mouse). (F) Summary of ID<sub>50</sub> titers measured for the three S2GΔSHR2-based vaccines against SARS-CoV-2-pps in (E). (G) Neutralization curves of human monoclonal antibodies (mAbs). In (A)-(G), SARS-CoV-2-pps that carry spikes of four strains, including the original Wuhan-Hu-1 strain and three variants, B.1.1.7, B1.351, and P.1, were tested in neutralization assays. (H) Neutralization curves of mouse plasma from two S2GΔHR2-presenting I3-01v9 SApNP vaccine groups against MLV-pps. One group was taken from (C), where mice were given 5 μg of adjuvanted antigen via i.p. injection and the other group was taken from (E), where mice were given 3.3 μg of adjuvanted antigen via i.d. injection. (I) Summary of ID<sub>50</sub> titers measured for two S2GΔHR2-presenting I3-01v9 SApNP vaccine groups against MLV-pps. In all tables, color coding indicates the level of ID<sub>50</sub> titer (white: no neutralization; green to red: low to high).



A

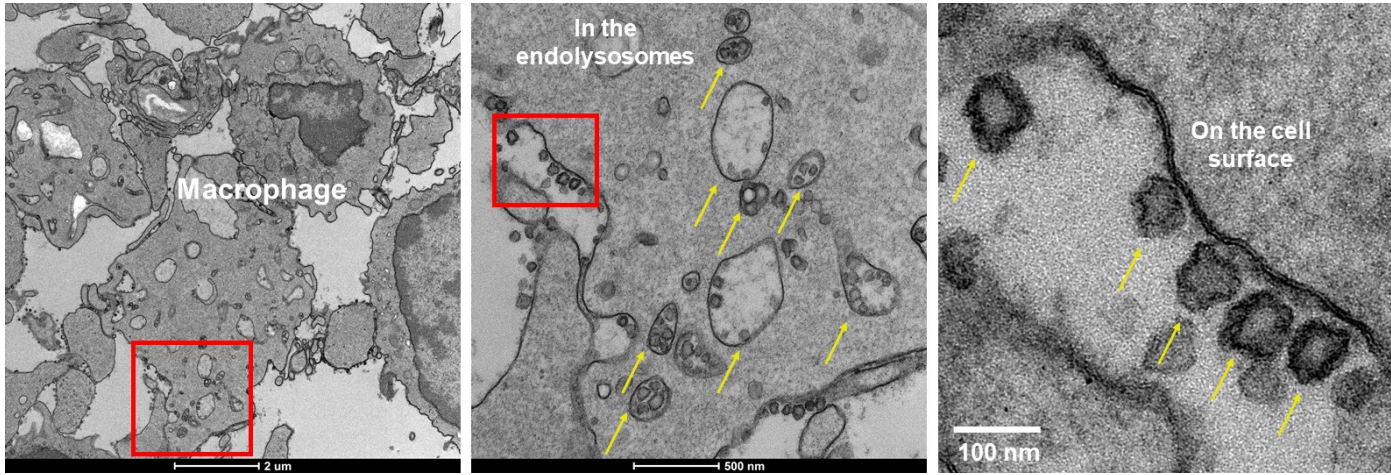

B

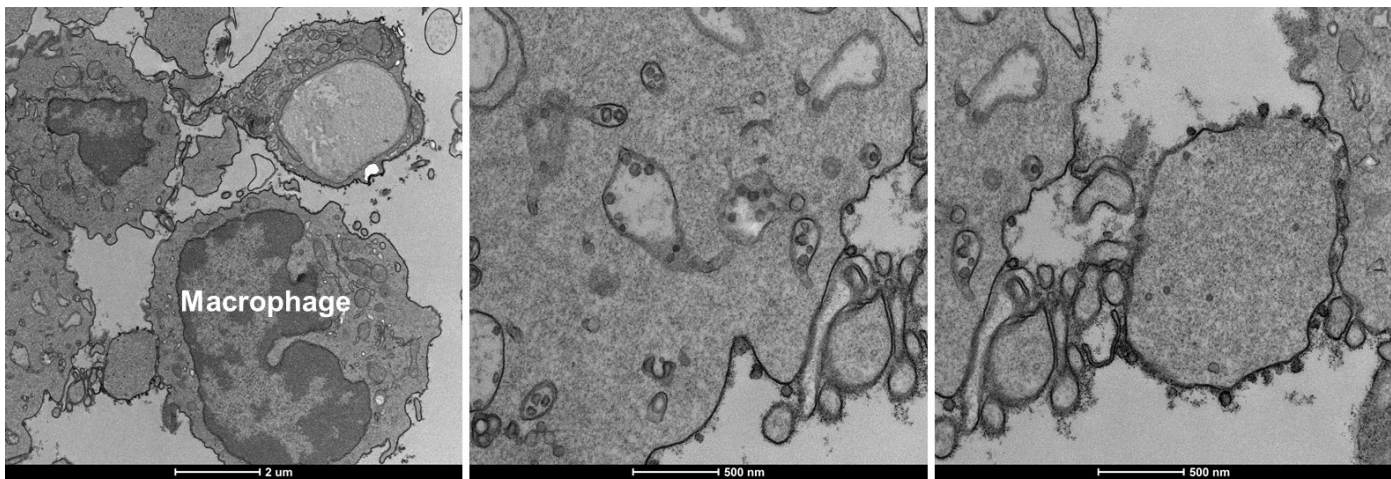

C

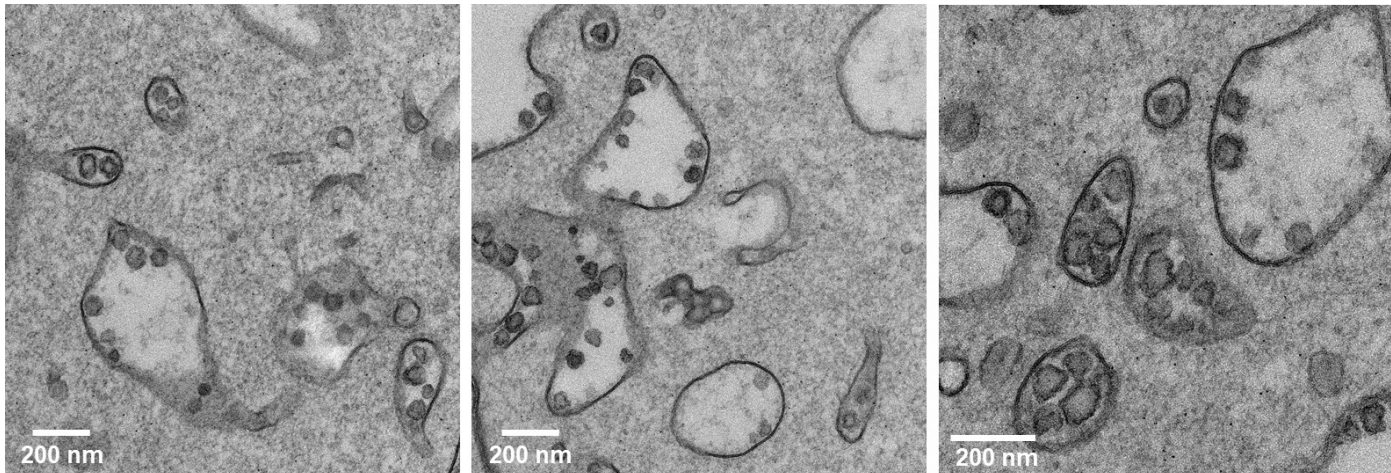

**fig. S2. SARS-CoV-2 spike-presenting I3-01v9 SApNP interaction with macrophages in a lymph node.** (A) S2G $\Delta$ HR2-presenting I3-01v9 SApNPs are sequestered by macrophages in the medullary sinus zone of a lymph node after a single-dose injection (50  $\mu$ g). S2G $\Delta$ HR2-presenting I3-01v9 SApNPs (B) aligned on macrophage surface or (C) sequestered inside the endolysosomes of a macrophage. S2G $\Delta$ HR2-presenting I3-01v9 SApNPs are pointed by yellow arrows.



A

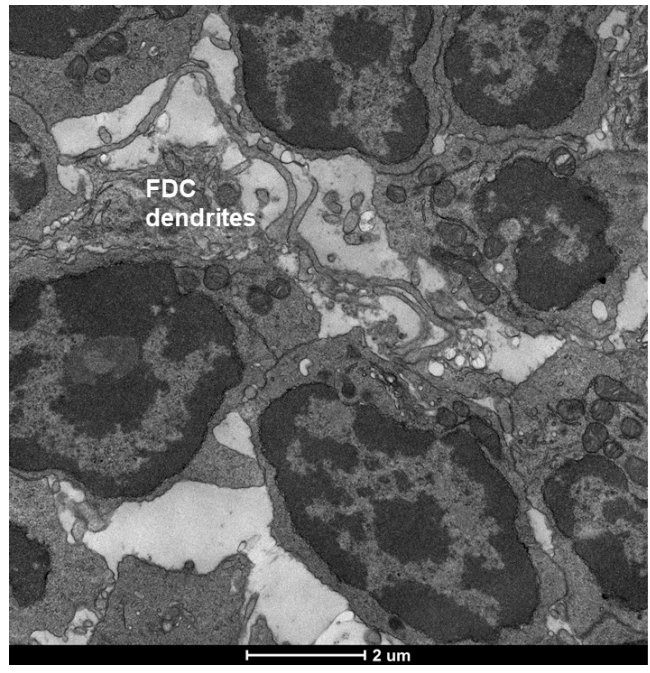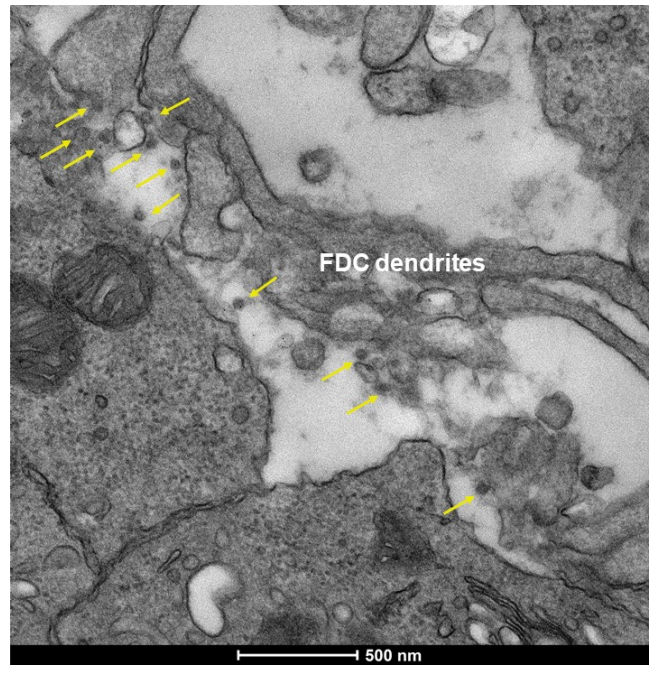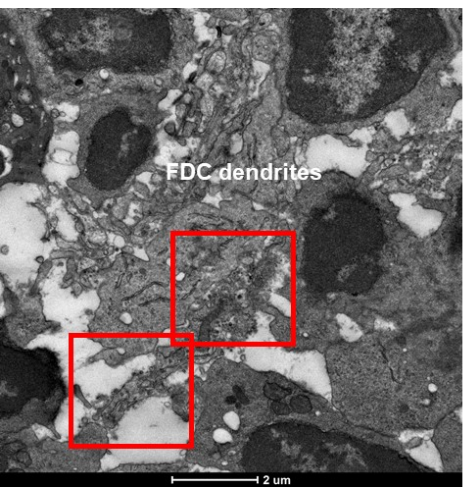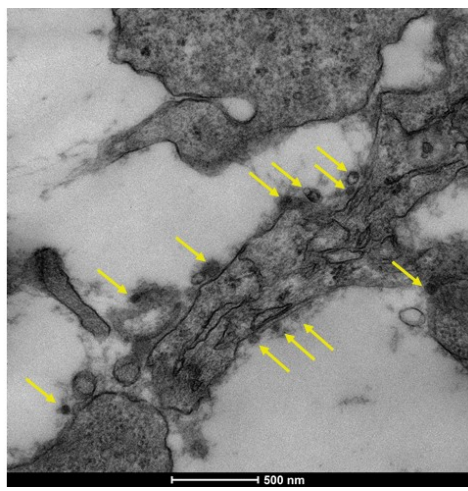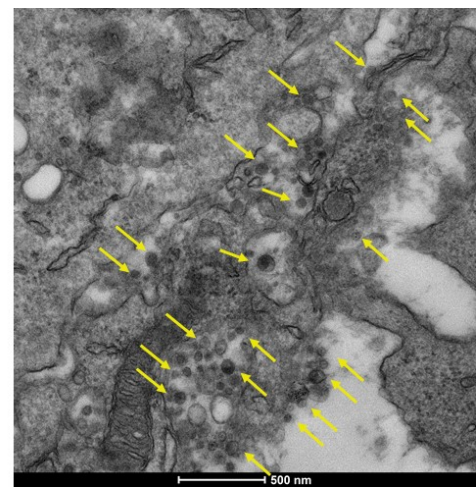

B

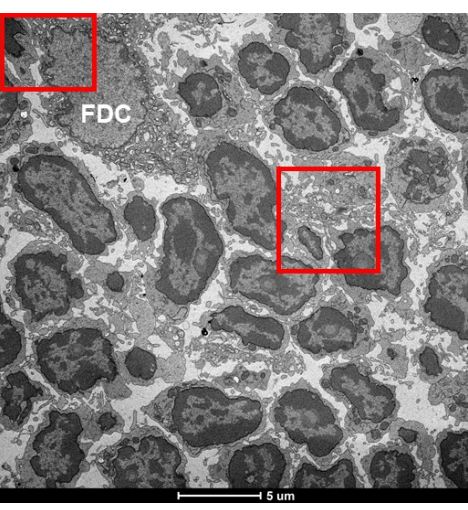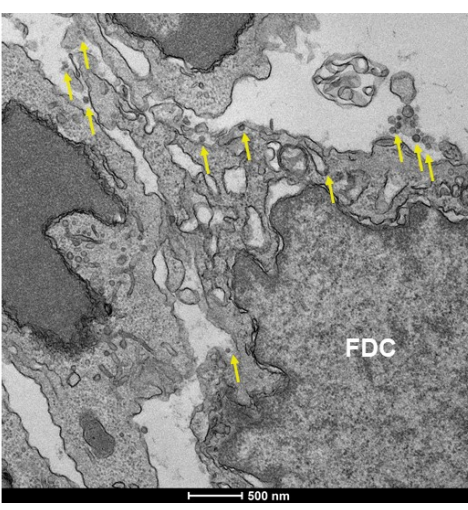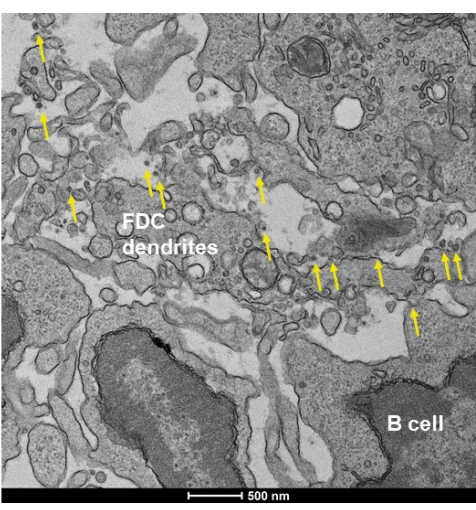



C

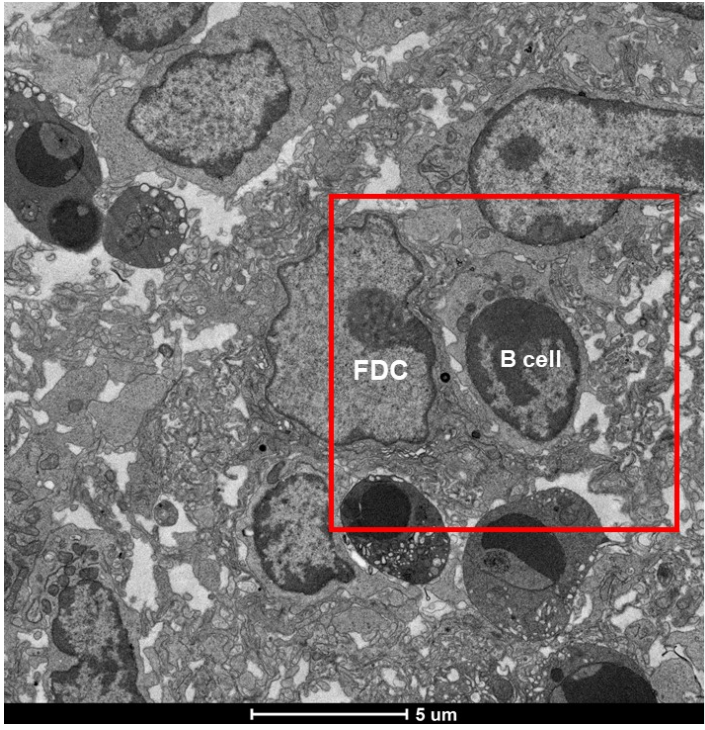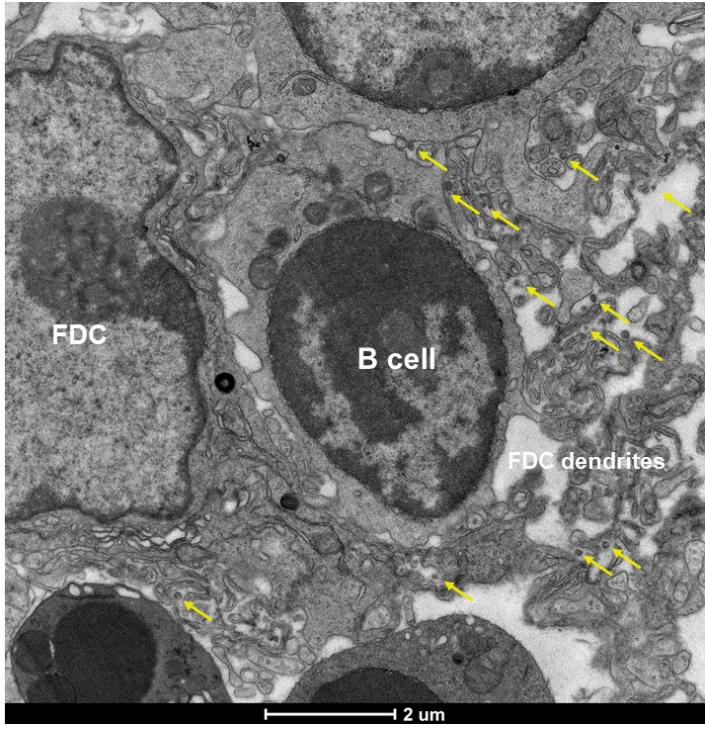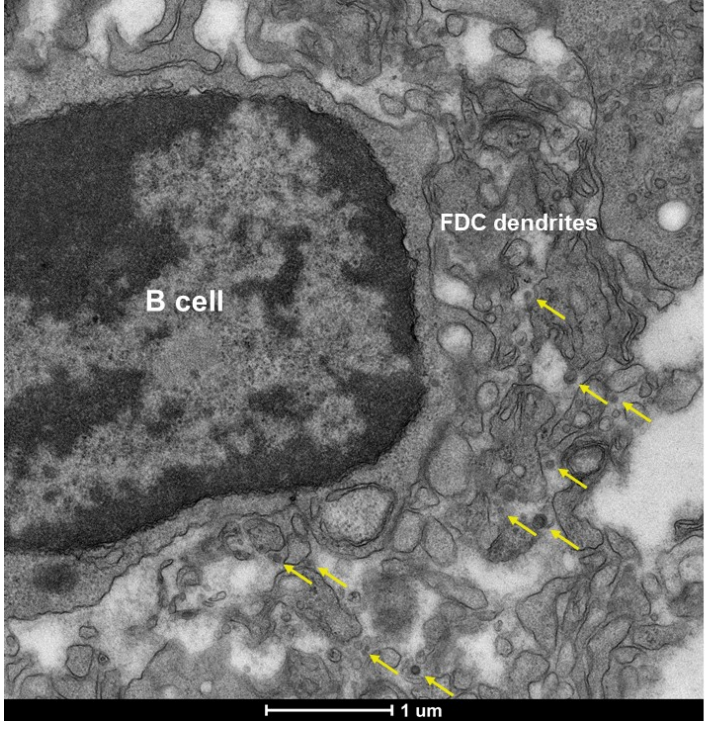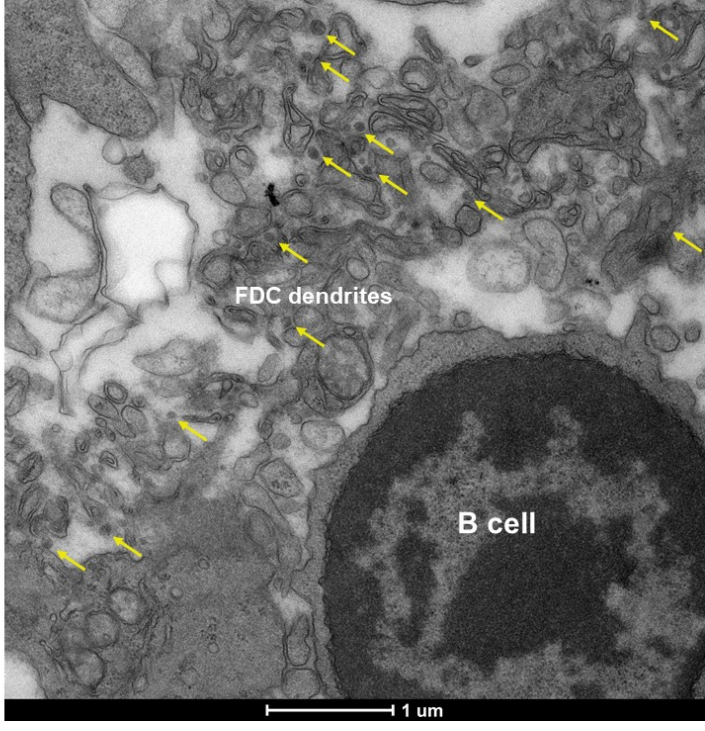



D

I3-01 nanoparticles injected at 2h

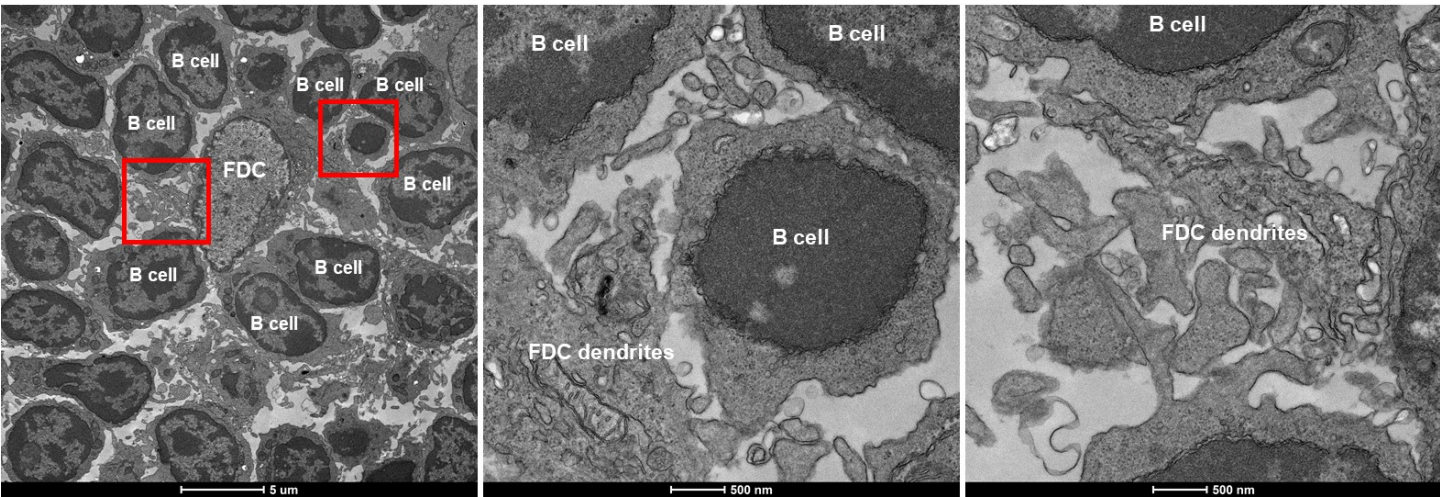

E

Lymph node from naïve mouse

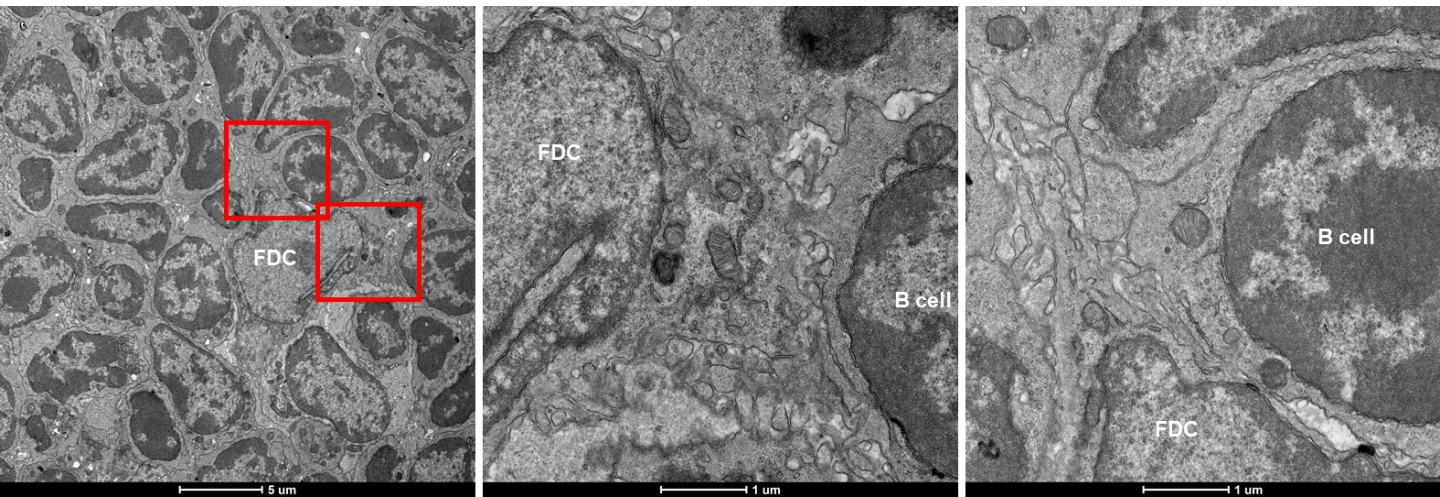

**fig. S3. TEM images of SARS-CoV-2 spike-presenting I3-01v9 SApNP interaction with FDCs in a lymph node.** S2G $\Delta$ HR2-presenting I3-01v9 SApNPs are aligned on FDC dendrites (A) at 12 h after a single-dose injection (50  $\mu$ g), (B) at 48 h after a single-dose injection (50  $\mu$ g), and (C) at 12 h after the boost injection (50  $\mu$ g). S2G $\Delta$ HR2-presenting I3-01v9 SApNPs are pointed by yellow arrows. (D) S2G $\Delta$ HR2-presenting I3-01v9 SApNPs were barely observed at 2 h after a single-dose injection (50  $\mu$ g). (E) Lymph node from a naïve, unimmunized mouse.

A

Single-dose – 2 w

S2G $\Delta$ HR2  
spike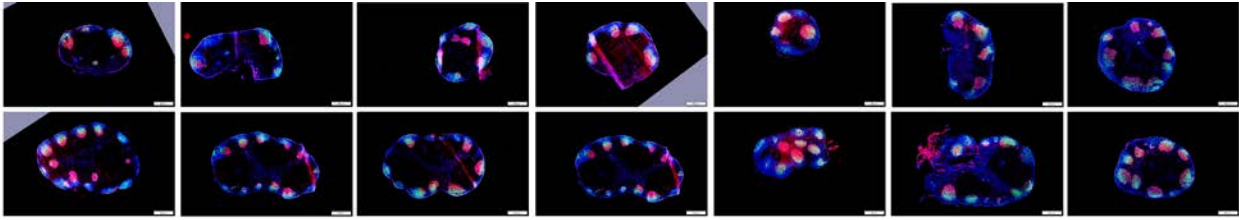E2p  
SApNP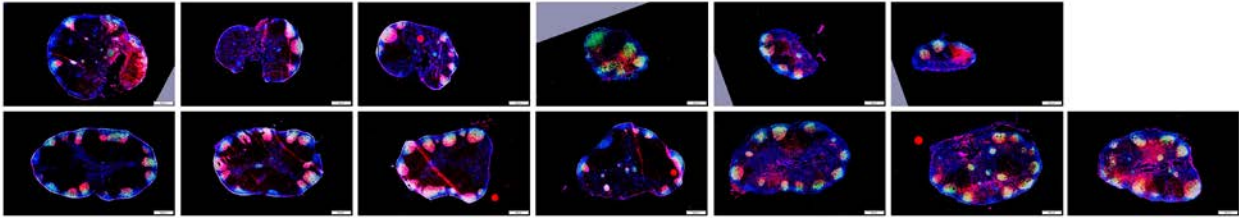I3-01v9  
SApNP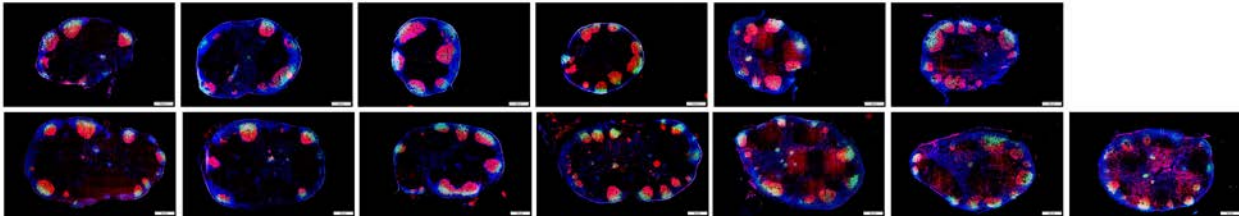

B

Single-dose – 5 w

S2G $\Delta$ HR2  
spike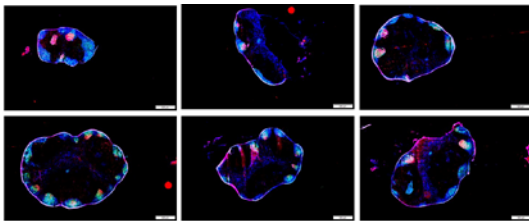E2p  
SApNP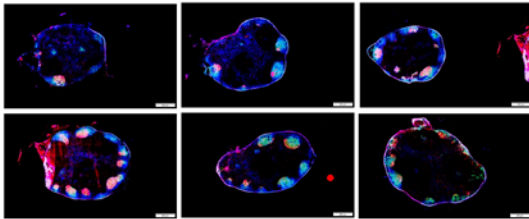I3-01v9  
SApNP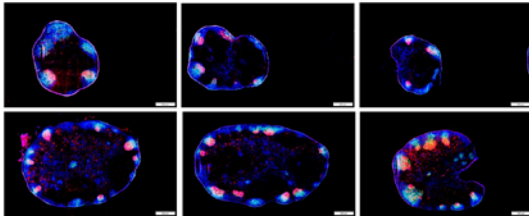

C

Single-dose – 8 w

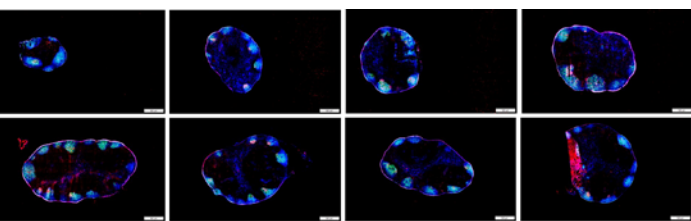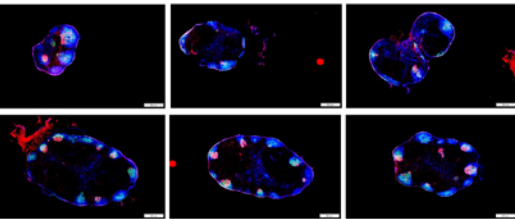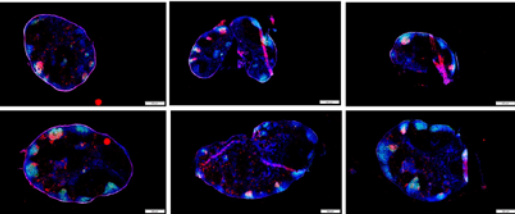



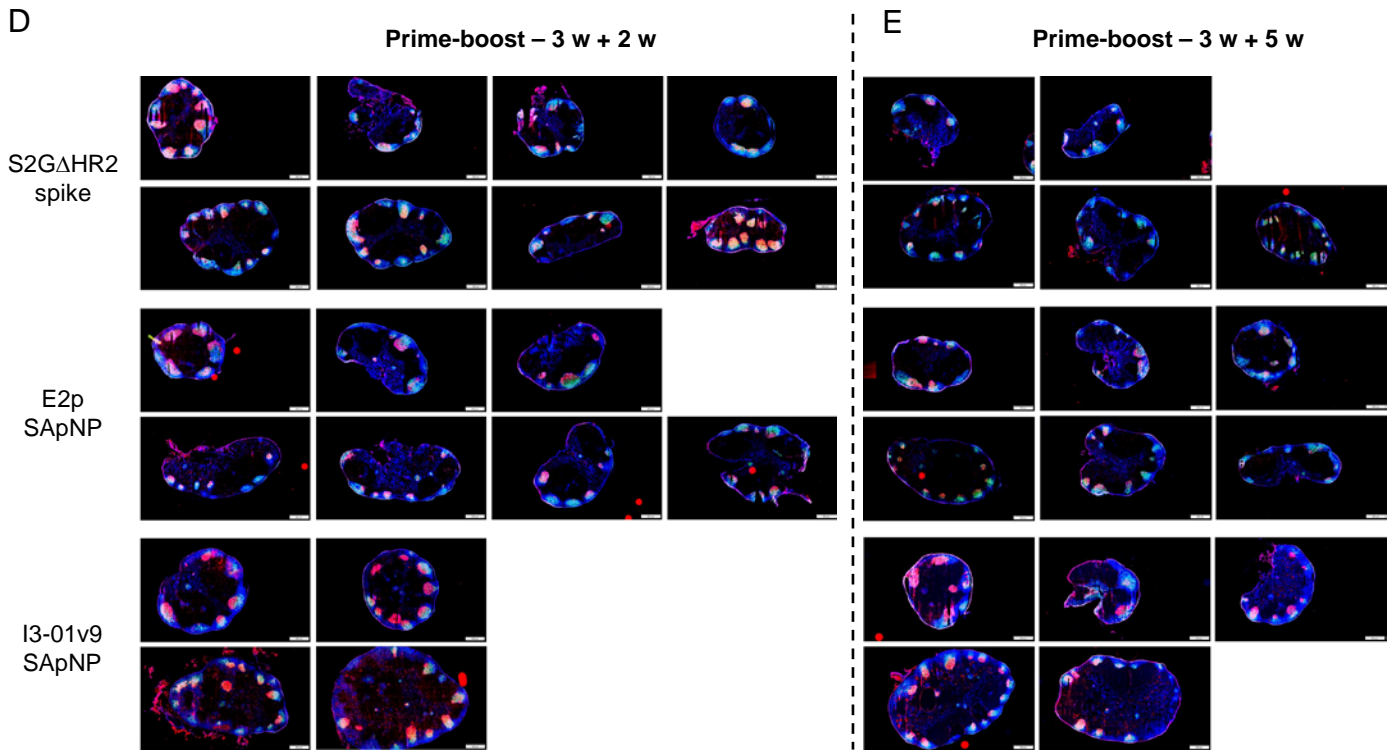

**fig. S4. Immunohistological analysis of SARS-CoV-2 spike/spike-presenting SApNP vaccine-induced GCs.** Images of germinal centers at (A) week 2, (B) week 5, and (C) week 8 after a single-dose injection of S2G $\Delta$ HR2 spike and S2G $\Delta$ HR2-presenting E2p and I3-01v9 SApNP vaccines (10  $\mu$ g per injection, 40  $\mu$ g for a mouse). Images of germinal centers at (D) week 2 and (E) week 5 after prime-boost injections.

A

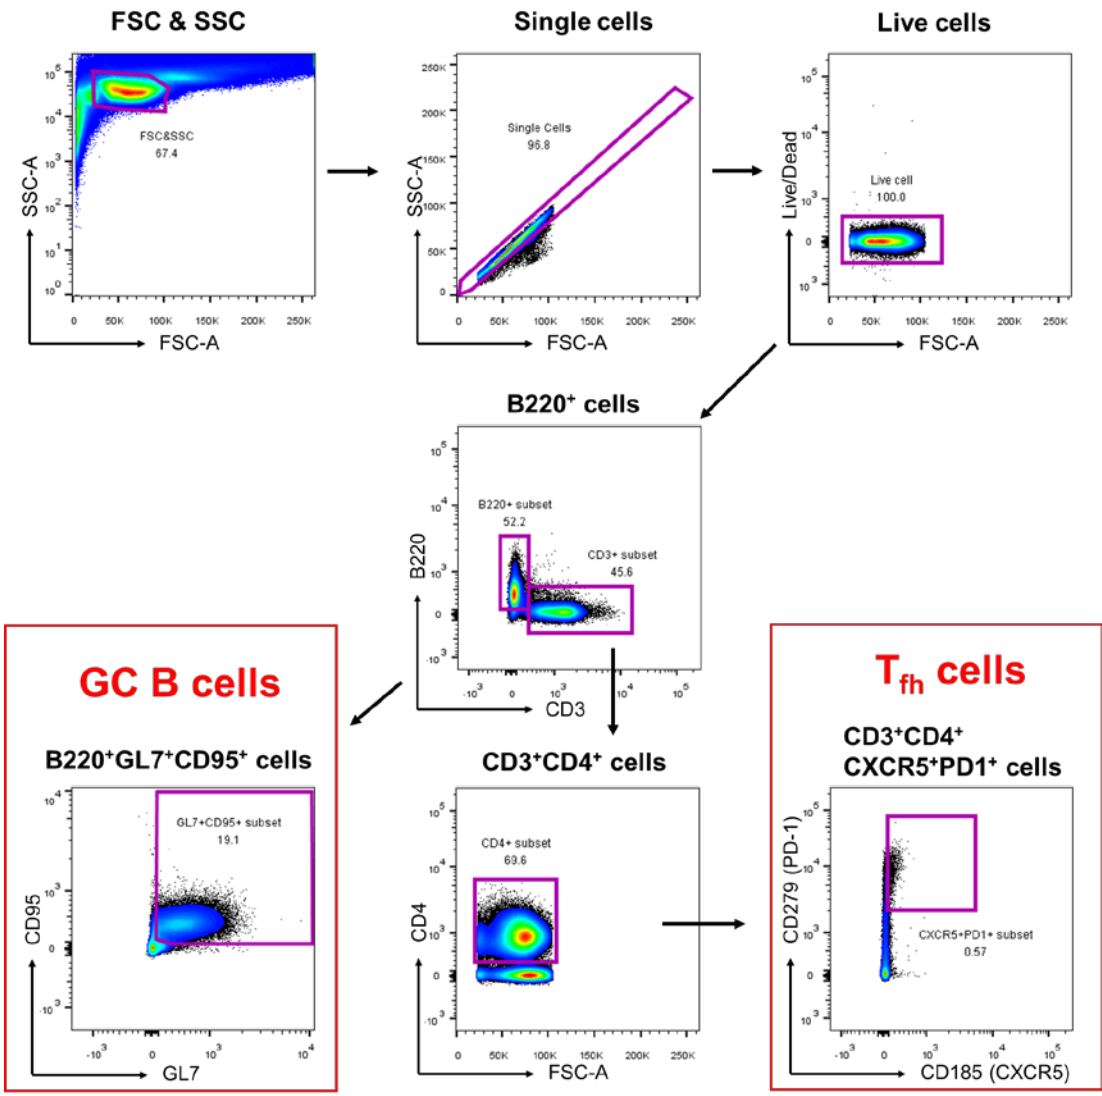



B

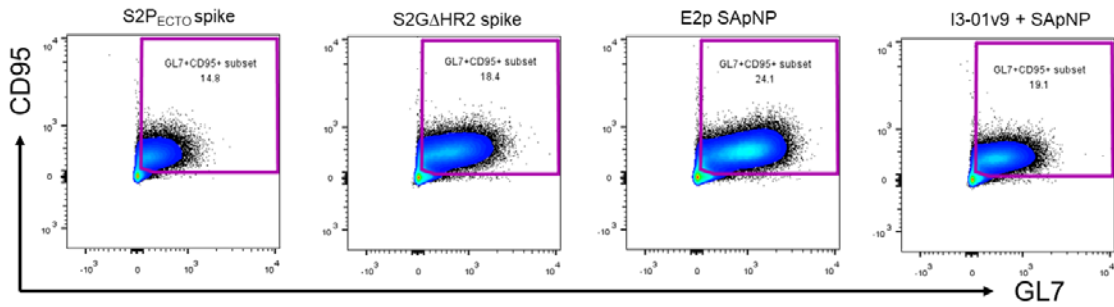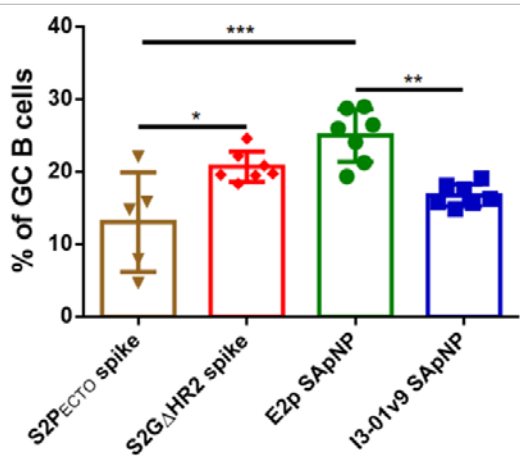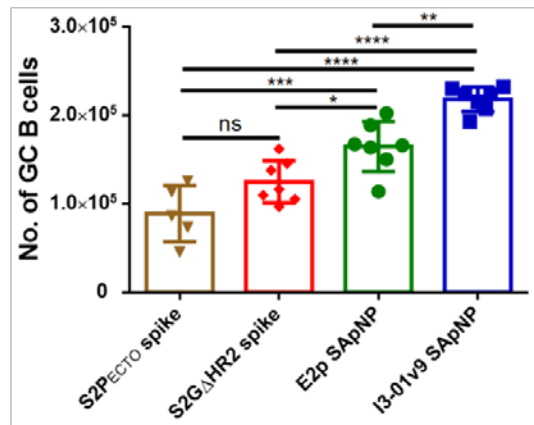

C

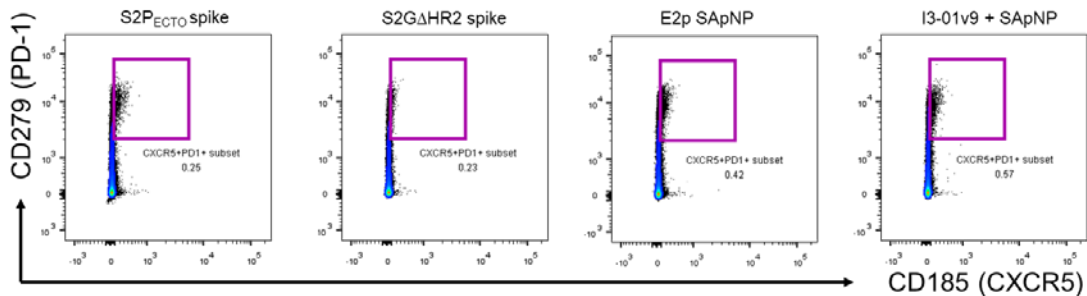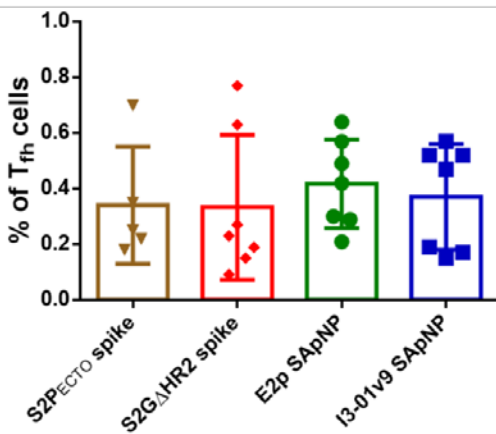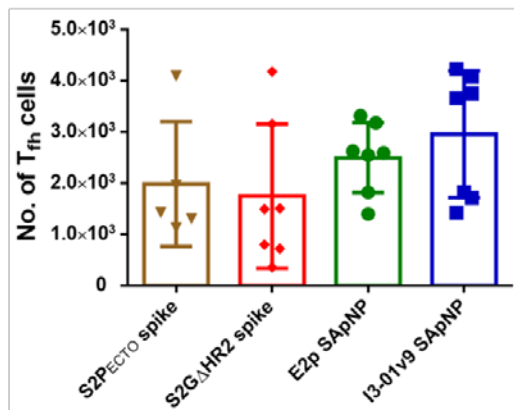

**fig. S5. Flow cytometry analysis of SARS-CoV-2 spike/spike-presenting SApNP vaccine-induced GCs.** (A) Gating strategy for analyzing germinal center reactions using flow cytometry. Quantification of germinal center reactions, including (B) GC B cells and (C) T follicular helper cells at week 2 after a single-dose injection of S2P<sub>ECTO</sub>, S2G $\Delta$ HR2, and S2G $\Delta$ HR2-presenting E2p and I3-01v9 SApNP vaccines (10  $\mu$ g per injection, 40  $\mu$ g for a mouse). Data points are presented as mean  $\pm$  SD. The  $P$  values were determined by one-way ANOVA followed by Tukey's multiple comparisons *post hoc* test for each timepoint. \* $p < 0.05$ , \*\* $p < 0.01$ , \*\*\* $p < 0.001$ , \*\*\*\* $p < 0.0001$ .

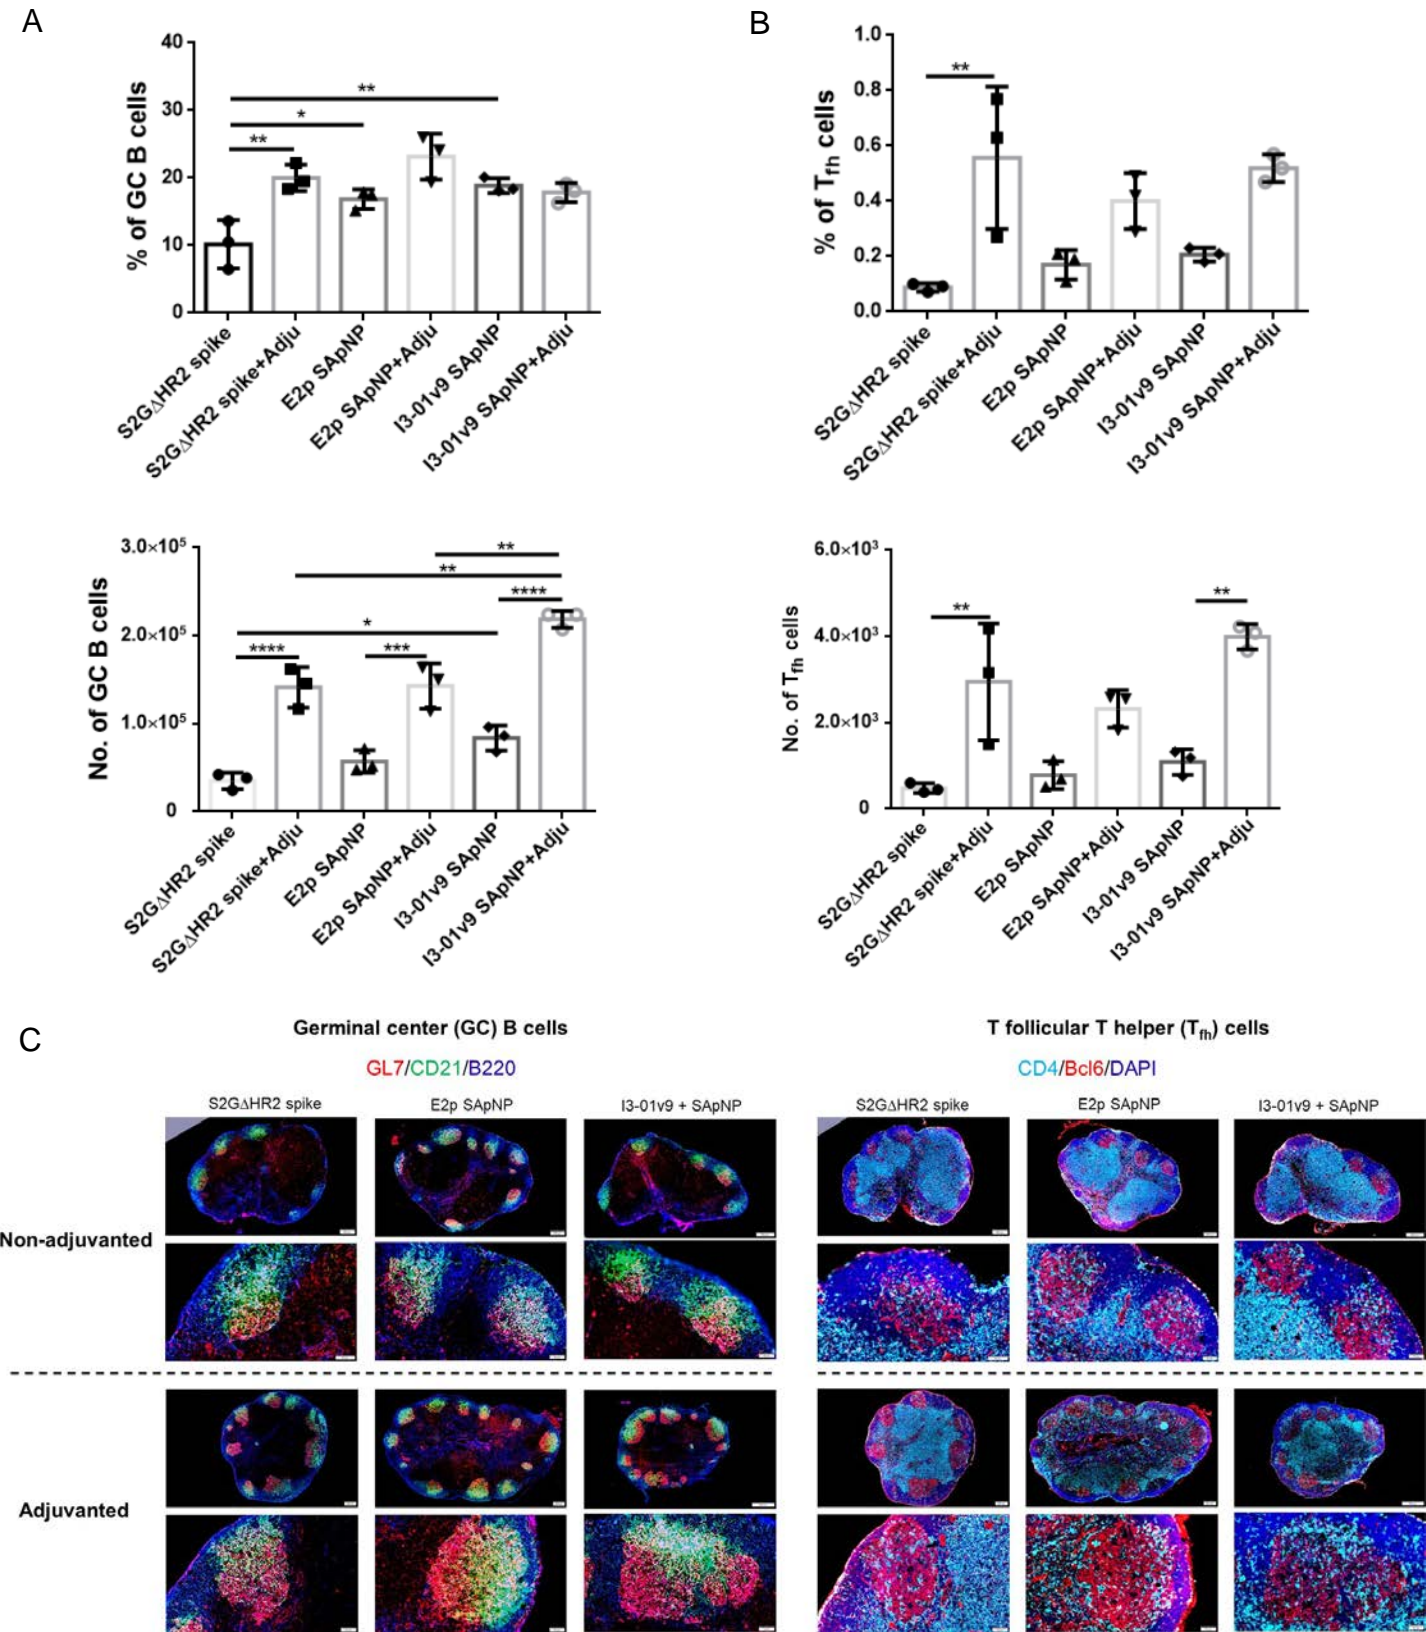

**fig. S6. Adjuvant effect on SARS-CoV-2 spike/spike-presenting SApNP vaccine-induced germinal centers.** Quantification of germinal center reactions, including (A) GC B cells and (B) T follicular helper cells at week 2 after a single-dose injection of S2P<sub>ECTO</sub>, S2G $\Delta$ HR2, and S2G $\Delta$ HR2-presenting E2p and I3-01v9 SApNP vaccines with/without adjuvants using flow cytometry (10  $\mu$ g per injection, 40  $\mu$ g for a mouse). (C) Immunohistology of germinal centers at week 2 after a single-dose injection with/without adjuvants. Data points are presented as mean  $\pm$  SD. The *P* values were determined by one-way ANOVA followed by Tukey's multiple comparisons *post hoc* test for each timepoint. \**p* < 0.05, \*\**p* < 0.01, \*\*\**p* < 0.001, \*\*\*\**p* < 0.0001.
